# Supplementary material for: Metabolite Profiling of Sorghum Seeds of Different Colors from Different Sweet Sorghum Cultivars Using a Widely Targeted Metabolomics Approach
Source: Int J Genomics. 2020 Mar 4;2020:6247429. doi: 10.1155/2020/6247429 (PMC7073482; doi:10.1155/2020/6247429)
Supplement: Supplementary 3 — Table S1: the metabolite and its corresponding content between Z6 vs. HC4. [file 6247429.f3.xlsx]

## Sheet: Sheet1
Table 1s. The metabolite and its corresponding content between Z6 VS HC4
Index	Compounds	Class	Z6-1	Z6-2	Z6-3	HC4-1	HC4-2	HC4-3	VIP	Fold_Change	Log2FC	Type
pma0110	O-Sinapoyl quinic acid	Quinate and its derivatives	26700	33100	45900	193000	232000	117000	1.21804	5.12772	2.35832	up
pma0149	Sinapoyl malate	Organic acids	2210000	2090000	2170000	7060000	7530000	4200000	1.20327	2.90417	1.53813	up
pma0253	O-methylChrysoeriol 5-O-hexoside	Flavone	137000	543000	367000	5850000	5950000	2970000	1.21136	14.107	3.81834	up
pma0724	Naringenin C-hexoside	Flavone C-glycosides	61800	53600	100000	9	9	9	1.27762	0.000125348	-12.9618	down
pma0791	Naringenin O-malonylhexoside	Flavanone	362000	327000	310000	1140000	1240000	721000	1.21947	3.1041	1.63418	up
pma0795	Tricetin O-malonylhexoside	Flavone	79200	160000	147000	381000	539000	244000	1.10737	3.01398	1.59167	up
pma0825	Chrysin O-malonylhexoside	Flavone	3500	7150	6730	55800	48500	55300	1.2529	9.18297	3.19896	up
pma1116	Kaempferide	Flavonol	394000	580000	479000	3540000	2990000	2220000	1.25501	6.02202	2.59025	up
pma6218	O-methylnaringenin C-pentoside	Flavone C-glycosides	37200	9	9	650000	596000	839000	1.06706	56.0213	5.8079	up
pma6389	Ayanin	Flavonol	8820	11700	11000	23700	32900	24100	1.22865	2.56028	1.3563	up
pma6460	5-O-p-Coumaroylquinic acid	Quinate and its derivatives	21200	26200	22500	84800	76100	98300	1.26517	3.70815	1.8907	up
pma6638	O-methylChrysoeriol 7-O-hexoside	Flavone	124000	488000	398000	6110000	6010000	3050000	1.21021	15.0198	3.90879	up
pma6647	C-hexosyl-chrysoeriol O-hexoside	Flavone C-glycosides	362000	467000	530000	121000	133000	129000	1.25704	0.281825	-1.82713	down
pmb0069	Benzamide	Others	437000	491000	527000	296000	54600	65700	1.05345	0.286117	-1.80532	down
pmb0130	N-Acetyl tryptamine	Phenolamides	842000	536000	617000	448000	177000	257000	1.05529	0.442105	-1.17754	down
pmb0163	DGMG (18:2) isomer3	Lipids_Glycerolipids	2620000	3040000	3150000	570000	708000	775000	1.26447	0.233031	-2.10141	down
pmb0164	MAG (18:2) isomer1	Lipids_Glycerolipids	265000	286000	275000	49500	69500	93200	1.23519	0.256901	-1.96072	down
pmb0197	N2-methylguanosine	Nucleotide and its derivates	937000	986000	916000	439000	313000	470000	1.22581	0.430433	-1.21614	down
pmb0423	Hydroxy-methoxycinnamate	Hydroxycinnamoyl derivatives	348000	413000	363000	5080000	3680000	3860000	1.27298	11.2278	3.489	up
pmb0449	2-Aminoadipic acid (L-Homoglutamic acid)	Amino acids	1570000	2340000	2010000	9150000	3220000	3950000	1.02702	2.75676	1.46297	up
pmb0468	N-formylmethionine	Amino acid derivatives	71400	82700	108000	9	9	9	1.27811	0.000103014	-13.2449	down
pmb0541	Cyanidin 3-O-glucosyl-malonylglucoside	Anthocyanins	9	9	9	342000	248000	129000	1.27637	26629.6	14.7007	up
pmb0557	Cyanidin O-malonyl-malonylhexoside	Anthocyanins	9	9	9	29100000	20900000	9850000	1.2772	2.21667e+06	21.08	up
pmb0578	Luteolin O-sinapoylhexoside	Flavone	15000	21700	69800	192000	158000	80700	1.05409	4.04413	2.01583	up
pmb0579	Chrysoeriol O-sinapoylhexoside	Flavone	16600	31200	31600	142000	125000	114000	1.23304	4.79849	2.26258	up
pmb0608	Chrysoeriol O-malonylhexoside	Flavone	680000	1070000	1920000	3650000	4750000	3180000	1.13101	3.15531	1.65778	up
pmb0618	8-C-hexosyl-hesperetin O-hexoside	Flavone C-glycosides	489000	430000	468000	2010000	1460000	601000	1.01927	2.93511	1.55342	up
pmb0622	C-hexosyl-luteolin O-hexoside	Flavone C-glycosides	9	9	9	57100	47800	22900	1.27561	4733.33	12.2086	up
pmb0624	6-C-hexosyl-luteolin O-hexoside	Flavone C-glycosides	83100	80400	137000	2580000	2310000	518000	1.18507	17.9967	4.16966	up
pmb0626	6-C-hexosyl-apigenin O-hexosyl-O-hexoside	Flavone C-glycosides	9	9	9	266000	252000	131000	1.27717	24037	14.553	up
pmb0628	Eriodictiol C-hexosyl-O-hexoside	Flavone C-glycosides	9	9	9	1100000	1130000	298000	1.27463	93629.6	16.5147	up
pmb0631	C-hexosyl-luteolin C-pentoside	Flavone C-glycosides	93300	150000	263000	1100000	1050000	413000	1.12462	5.06222	2.33977	up
pmb0652	C-hexosyl-apigenin O-pentoside	Flavone C-glycosides	15500	53000	62300	355000	313000	200000	1.15945	6.63609	2.73033	up
pmb0661	Chrysoeriol C-hexosyl-O-rhamnoside	Flavone C-glycosides	71300	106000	105000	189000	227000	167000	1.17566	2.06518	1.04627	up
pmb0681	Apigenin 8-C-pentoside	Flavone C-glycosides	9	11600	9	175000	175000	112000	1.07562	39.7659	5.31346	up
pmb0684	C-hexosyl-luteolin O-sinapic acid	Flavone C-glycosides	16600	21200	76100	225000	167000	118000	1.09614	4.47761	2.16273	up
pmb0701	Chrysoeriol 8-C-hexoside	Flavone C-glycosides	1100000	1550000	1440000	151000	207000	131000	1.26163	0.11956	-3.06419	down
pmb0706	Quercetin 5-O-malonylhexosyl-hexoside	Flavonol	9	9	9	330000	278000	114000	1.27574	26740.7	14.7068	up
pmb0713	Tricin 7-O-hexosyl-O-hexoside	Flavone	25300	57100	141000	783000	667000	309000	1.136	7.87377	2.97705	up
pmb0720	Tricin O-malonylhexoside	Flavone	76900	165000	650000	2740000	2340000	1230000	1.10178	7.07478	2.82269	up
pmb0725	Tricin 7-O-feruloylhexoside	Flavone	9	9	33200	259000	211000	118000	1.01339	17.7012	4.14578	up
pmb0738	Tricin O-sinapoylhexoside	Flavone	9	9	28900	241000	184000	91400	1.0133	17.8574	4.15845	up
pmb0774	N-hydroxy tryptamine	Tryptamine derivatives	1460000	2050000	2100000	9	9	9	1.2782	4.81283e-06	-17.6647	down
pmb0789	Pyridoxine O-glucoside	Vitamins	1740000	1860000	1730000	953000	1040000	671000	1.19333	0.499812	-1.00054	down
pmb0790	Pyridoxine di-O-hexoside	Vitamins	345000	379000	386000	94900	108000	75100	1.26206	0.25045	-1.9974	down
pmb0801	4-Pyridoxic acid O-hexoside	Vitamins	6500000	6650000	6220000	14100000	16200000	8680000	1.11087	2.01239	1.00891	up
pmb0818	Methoxyindoleacetic acid	Indole derivatives	3210000	3120000	3030000	6890000	6660000	7710000	1.27002	2.27137	1.18356	up
pmb0819	3-Indoleacetonitrile	Indole derivatives	445000	447000	432000	1000000	1100000	1070000	1.2758	2.39426	1.25958	up
pmb0835	Gallocatechin-gallocatechin	Catechin derivatives	712000	810000	772000	11000000	11600000	3770000	1.21922	11.4952	3.52296	up
pmb0848	LysoPC 16:1 (2n isomer)	Lipids_Glycerophospholipids	4880000	4170000	3730000	69800000	43800000	46000000	1.26688	12.4883	3.6425	up
pmb0856	LysoPE 18:1 (2n isomer)	Lipids_Glycerophospholipids	3360000	2190000	2040000	9540000	4960000	6820000	1.15118	2.80896	1.49004	up
pmb0859	LysoPC 18:1 (2n isomer)	Lipids_Glycerophospholipids	2620000	2100000	1990000	9220000	5520000	6630000	1.22296	3.1848	1.6712	up
pmb0863	LysoPC 16:2 (2n isomer)	Lipids_Glycerophospholipids	2630000	2080000	1950000	8330000	5790000	6900000	1.2416	3.15616	1.65817	up
pmb0865	LysoPC 18:3 (2n isomer)	Lipids_Glycerophospholipids	3410000	2980000	2900000	11300000	6900000	9400000	1.22855	2.97094	1.57092	up
pmb0873	LysoPC 18:2 (2n isomer)	Lipids_Glycerophospholipids	8380000	6660000	5930000	34800000	19900000	27900000	1.22929	3.93896	1.97781	up
pmb0877	LysoPE 18:1	Lipids_Glycerophospholipids	4480000	3020000	2710000	12200000	6590000	8920000	1.154	2.71401	1.44042	up
pmb0880	LysoPE 18:0 (2n isomer)	Lipids_Glycerophospholipids	214000	215000	263000	45500	46400	54800	1.27032	0.211994	-2.2379	down
pmb0885	4-oxo-9Z,11Z,13E,15E-octadecatetraenoic acid	Lipids_Fatty acids	3100	3580	3180	7890	6120	7590	1.24557	2.19067	1.13137	up
pmb0889	Punicic acid	Lipids_Fatty acids	54400000	64000000	59700000	28800000	26500000	31400000	1.25573	0.486805	-1.03858	down
pmb0890	MAG (18:2)	Lipids_Glycerolipids	7330000	11100000	11400000	35000000	25600000	23700000	1.20437	2.82601	1.49877	up
pmb0896	N'-Feruloyl putrescine	Phenolamides	2290000	1750000	2290000	5210000	4310000	3380000	1.16885	2.03791	1.02709	up
pmb0952	Thiamine	Vitamins	59900	36800	50800	102000	1240000	1690000	1.04109	20.5559	4.36148	up
pmb1096	Indole	Indole derivatives	4000000	3650000	3450000	7960000	8110000	6490000	1.24424	2.03243	1.02321	up
pmb1178	O-Feruloyl 2-hydroxylcoumarin	Coumarins	9	9	9	2540000	1890000	1250000	1.27772	210370	17.6826	up
pmb1562	MAG (18:4) isomer3	Lipids_Glycerolipids	72700	114000	107000	189000	141000	265000	1.0651	2.02588	1.01855	up
pmb1605	MAG (18:3) isomer3	Lipids_Glycerolipids	1070000	944000	1090000	155000	189000	199000	1.27216	0.174936	-2.5151	down
pmb1626	MGMG (18:2) isomer1	Lipids_Glycerolipids	1220000	1450000	1410000	552000	568000	551000	1.26842	0.409559	-1.28786	down
pmb1656	MAG (18:3) isomer4	Lipids_Glycerolipids	65100	82000	82700	244000	172000	206000	1.23781	2.7067	1.43654	up
pmb1754	O-Phosphocholine	Cholines	1560000	1800000	1710000	4090000	3900000	3010000	1.23441	2.16963	1.11745	up
pmb2165	LysoPC 10:0	Lipids_Glycerophospholipids	19700	16300	19100	30900	38300	45200	1.20776	2.07623	1.05396	up
pmb2388	LysoPC 18:0 (2n isomer)	Lipids_Glycerophospholipids	5710000	4680000	4210000	21000000	12800000	15300000	1.22902	3.36301	1.74975	up
pmb2444	MAG (18:3) isomer1	Lipids_Glycerolipids	5430000	6100000	6130000	13200000	10400000	12300000	1.24575	2.03284	1.0235	up
pmb2507	2-Deoxyribose 1-phosphate	Carbohydrates	126000	178000	203000	1480000	1160000	1470000	1.26337	8.10651	3.01908	up
pmb2554	5-O-Feruloyl quinic acid glucoside	Quinate and its derivatives	22800	28200	18800	45500	52700	46400	1.21307	2.07163	1.05077	up
pmb2591	Acetyl tryptophan	Amino acid derivatives	14700	41700	22000	336000	252000	196000	1.23022	10	3.32193	up
pmb2601	7-hydroxycoumarin-beta-rhamnoside	Coumarins	13100	15200	17000	9	9	9	1.27824	0.000596026	-10.7123	down
pmb2620	3,4-Dimethoxycinnamic acid	Hydroxycinnamoyl derivatives	232000	188000	231000	573000	422000	522000	1.23203	2.33026	1.22049	up
pmb2653	D(+)-Melezitose O-rhamnoside	Carbohydrates	126000	122000	88700	56100	46400	65200	1.17407	0.498069	-1.00558	down
pmb2778	9,10-EODE	Lipids_Fatty acids	23600000	25900000	30300000	11100000	11200000	12200000	1.2565	0.432331	-1.20979	down
pmb2795	4-Methoxycinnamic acid	Hydroxycinnamoyl derivatives	163000	201000	230000	2780000	1540000	2520000	1.25952	11.5152	3.52546	up
pmb2833	3-O-Feruloyl quinic acid glucoside	Quinate and its derivatives	17000	18000	17200	36100	46400	33900	1.2425	2.22989	1.15697	up
pmb2835	Syringaldehyde	Hydroxycinnamoyl derivatives	12700	14900	21900	33800	35000	32400	1.16916	2.04444	1.03171	up
pmb2857	L-Glutamic acid O-glucoside	Amino acid derivatives	200000	290000	283000	685000	616000	880000	1.22269	2.82147	1.49645	up
pmb2867	Kynurenic acid O-hexside	Organic acids	7030	9	9	47800	35100	31600	1.03188	16.2457	4.02199	up
pmb2871	2,5-dihydroxy benzoic acid O-hexside	Benzoic acid derivatives	613000	733000	978000	2010000	2060000	1990000	1.23094	2.60757	1.38271	up
pmb2922	Uridine 5'-diphospho-D-glucose	Nucleotide and its derivates	78200	120000	120000	693000	312000	411000	1.19607	4.45003	2.15382	up
pmb2938	4-O-Caffeoyl quinic acid (criptochlorogenic acid)	Quinate and its derivatives	17900	18100	19700	83100	73500	45400	1.22502	3.62657	1.85861	up
pmb2940	1-O-beta-D-Glucopyranosyl sinapate	Hydroxycinnamoyl derivatives	13500	21800	39600	1410000	1270000	967000	1.26085	48.6916	5.6056	up
pmb2957	Cyanidin O-syringic acid	Anthocyanins	51400	49200	75300	3490000	2500000	2560000	1.27294	48.6072	5.6031	up
pmb2959	Cyanidin O-acetylhexoside	Anthocyanins	9	9	9	1850000	1210000	1300000	1.27812	161481	17.301	up
pmb2965	Cyanidin O-diacetyl-hexoside-O-glyceric acid	Anthocyanins	9	9	9	82300	58200	58900	1.278	7385.19	12.8504	up
pmb2968	Chrysoeriol C-hexosyl-O-hexoside	Flavone C-glycosides	12400	14700	17800	4700	7530	5110	1.19763	0.386192	-1.37261	down
pmb2986	Chrysoeriol O-hexosyl-O-malonylhexoside	Flavone	21100	30500	22700	9	9	9	1.27775	0.000363392	-11.4262	down
pmb2999	Chrysoeriol 5-O-hexoside	Flavone	317000	463000	761000	2040000	1810000	2190000	1.20091	3.91953	1.97068	up
pmb3012	Chrysoeriol 7-O-hexoside	Flavone	276000	354000	463000	962000	1090000	1120000	1.22846	2.9021	1.5371	up
pmb3023	Eriodictyol C-hexoside	Flavone C-glycosides	21400	42800	32000	642000	541000	644000	1.26684	18.9917	4.2473	up
pmb3044	Tricin di-O-hexoside	Flavone	9	5590	9	25800	15300	21800	1.01817	11.2161	3.4875	up
pmb3046	Tricin 7-O-hexoside	Flavone	9	9	26700	227000	210000	158000	1.03066	22.2696	4.47701	up
pmb3056	Homovanilloyl quinic acid	Quinate and its derivatives	9	9	9	9620	13400	16900	1.27731	1478.52	10.5299	up
pmb3062	Eudesmoyl quinic acid	Quinate and its derivatives	7370	11100	11200	22200	15900	33700	1.09541	2.41995	1.27498	up
pmb3068	1-O-p-Coumaroyl quinic acid	Quinate and its derivatives	36300	43300	37700	338000	326000	339000	1.27719	8.55072	3.09605	up
pmb3081	Glucarate O-Phosphoric acid	Carbohydrates	986000	1450000	1290000	503000	556000	463000	1.22817	0.408481	-1.29166	down
pmb3093	6,7-dihydroxycoumarin 7-O-quinic acid	Coumarins	10000	12900	14600	53500	44400	50100	1.25826	3.94667	1.98063	up
pmb3107	Syringic acid O-glucoside	Benzoic acid derivatives	4300	5610	6110	13300	15200	12700	1.2412	2.57179	1.36277	up
pmb3894	Di-O-methylquercetin	Flavonol	6550000	7220000	7390000	2470000	2300000	3540000	1.22753	0.392722	-1.34842	down
pmb4486	Hordatine B	Phenolamides	63700	59400	57700	20300	23100	21200	1.27279	0.357301	-1.48479	down
pmb4777	4-Hydroxy-7-methoxycoumarin-beta-rhamnoside	Coumarins	51500	139000	143000	467000	377000	490000	1.15942	4	2	up
pmc0960	LysoPC 20:4	Lipids_Glycerophospholipids	325000	263000	272000	847000	517000	693000	1.19793	2.39186	1.25813	up
pmd0130	LysoPC 14:0 (2n isomer)	Lipids_Glycerophospholipids	1440000	1490000	1430000	3970000	3140000	3520000	1.26302	2.43807	1.28574	up
pmd0132	LysoPC 16:0 (2n isomer)	Lipids_Glycerophospholipids	6150000	7290000	7440000	15000000	12700000	16700000	1.23558	2.12644	1.08844	up
pmd0136	LysoPC 18:0	Lipids_Glycerophospholipids	36700000	38000000	40600000	87300000	77800000	106000000	1.24716	2.35126	1.23343	up
pmd0144	LysoPC 20:1 (2n isomer)	Lipids_Glycerophospholipids	527000	414000	423000	2760000	1470000	2270000	1.23531	4.7654	2.2526	up
pmd0145	LysoPC 20:1	Lipids_Glycerophospholipids	547000	449000	430000	2980000	1510000	2240000	1.23094	4.7195	2.23863	up
pme0009	L-Serine	Amino acids	525000	674000	554000	350000	229000	287000	1.18515	0.49401	-1.01739	down
pme0016	L-(-)-Cystine	Amino acids	26900	53200	41200	110000	71900	106000	1.12433	2.37345	1.24699	up
pme0026	L-(+)-Lysine	Amino acids	6650000	6170000	6320000	15500000	14600000	12900000	1.26483	2.2466	1.16775	up
pme0031	Thymine	Nucleotide and its derivates	95700	132000	104000	391000	285000	284000	1.23501	2.89418	1.53316	up
pme0056	2,3-dimethylsuccinic acid	Amino acid derivatives	214000	173000	239000	408000	391000	464000	1.22081	2.01757	1.01262	up
pme0094	Cyanidin 3-O-glucoside (Kuromanin)	Anthocyanins	9	9	9	546000	391000	405000	1.27819	49703.7	15.6011	up
pme0118	Pyrrole-2-carboxylic acid	Amino acid derivatives	23000	27600	25800	87900	82800	116000	1.25921	3.75262	1.9079	up
pme0122	N6-Acetyl-L-lysine	Amino acid derivatives	214000	310000	302000	2130000	862000	1760000	1.20462	5.75303	2.52432	up
pme0137	Nα-Acetyl-L-glutamine	Amino acid derivatives	100000	121000	138000	481000	399000	428000	1.26083	3.64345	1.86531	up
pme0163	β-Nicotinamide mononucleotide	Nucleotide and its derivates	2450000	2400000	2410000	945000	1120000	722000	1.23621	0.383884	-1.38126	down
pme0170	Nα-Acetyl-L-arginine	Amino acid derivatives	158000	131000	101000	422000	438000	686000	1.22604	3.9641	1.98699	up
pme0181	1-Methylhistidine	Amino acid derivatives	167000	165000	168000	404000	302000	382000	1.24454	2.176	1.12168	up
pme0183	2-Hydroxy-6-aminopurine	Nucleotide and its derivates	5090000	5600000	6410000	2340000	1730000	1960000	1.25178	0.352632	-1.50377	down
pme0233	Kynurenic acid	Organic acids	112000	160000	268000	629000	456000	578000	1.16084	3.07963	1.62276	up
pme0243	Glutaric acid	Organic acids	438000	528000	615000	1080000	1070000	1160000	1.23387	2.09361	1.06599	up
pme0264	Thymidine	Nucleotide and its derivates	1620000	1860000	1990000	1010000	788000	629000	1.2029	0.443693	-1.17237	down
pme0267	2-Methylsuccinic acid	Organic acids	450000	500000	617000	1040000	1130000	1160000	1.23752	2.12508	1.08752	up
pme0278	2,6-Diaminooimelic acid	Amino acid derivatives	1960000	2370000	2310000	7960000	6260000	8880000	1.25555	3.47892	1.79864	up
pme0285	4-Guanidinobutyric acid	Organic acids	2750000	3080000	3000000	14700000	10900000	10100000	1.25964	4.04304	2.01544	up
pme0295	4-Acetamidobutyric acid	Organic acids	313000	373000	402000	818000	962000	1360000	1.21787	2.88603	1.52909	up
pme0299	Cinnamic acid	Hydroxycinnamoyl derivatives	8530	12600	11100	20400	30400	33200	1.19015	2.60627	1.38199	up
pme0307	Resveratrol	Hydroxycinnamoyl derivatives	3440	8020	8330	55300	56200	33800	1.21619	7.34209	2.87619	up
pme0330	Naringenin 7-O-neohesperidoside (Naringin)	Flavanone	246000	330000	446000	654000	759000	735000	1.16103	2.10176	1.0716	up
pme0359	Apigenin 5-O-glucoside	Flavone	456000	463000	298000	5600000	4190000	2740000	1.24923	10.2958	3.36399	up
pme0369	Kaempferol 3-O-rutinoside (Nicotiflorin)	Flavonol	323000	406000	445000	775000	577000	1120000	1.09697	2.10562	1.07425	up
pme0371	Naringenin 7-O-glucoside (Prunin)	Flavanone	190000	186000	184000	647000	561000	649000	1.27398	3.31607	1.72948	up
pme0376	Naringenin	Flavanone	781000	2320000	1860000	3900000	3770000	5060000	1.06526	2.56601	1.35953	up
pme0413	Vanillin	Benzoic acid derivatives	2430000	2410000	3100000	873000	811000	919000	1.26278	0.327834	-1.60896	down
pme0428	3,4,5-Trimethoxycinnamic acid	Hydroxycinnamoyl derivatives	4310	8150	6190	13300	8800	15300	1.04611	2.00536	1.00386	up
pme0430	Procyanidin A1	Proanthocyanidins	9	9	9	346000	212000	110000	1.27558	24740.7	14.5946	up
pme0432	Procyanidin A2	Proanthocyanidins	9	9	9	72500	45700	28400	1.27581	5429.63	12.4066	up
pme0500	D(+)-Melezitose	Carbohydrates	351000	282000	256000	89600	123000	118000	1.23211	0.371879	-1.4271	down
pme0513	Xylitol	Alcohols and polyols	49700	80100	58700	640000	348000	385000	1.24401	7.28382	2.8647	up
pme0534	Gluconic acid	Carbohydrates	3050000	3690000	3400000	19200000	17900000	34000000	1.24876	7.01183	2.80979	up
pme0543	Indole-5-carboxylic acid	Indole derivatives	391000	360000	311000	1940000	1970000	2340000	1.27215	5.88512	2.55707	up
pme1021	D-(+)-Glucono-1,5-lactone	Carbohydrates	19000	23100	10600	71200	76000	115000	1.21198	4.97533	2.31479	up
pme1086	Glutathione reduced form	Amino acid derivatives	2380000	2290000	1980000	133000	298000	217000	1.25211	0.0974436	-3.35929	down
pme1097	Adenine	Nucleotide and its derivates	1850000	2110000	2120000	979000	686000	925000	1.23299	0.425987	-1.23112	down
pme1109	Guanine	Nucleotide and its derivates	66900000	71200000	80800000	18500000	11300000	13200000	1.25698	0.196437	-2.34786	down
pme1137	6-hydroxynicotinic acid	Vitamins	111000	114000	101000	346000	208000	208000	1.17665	2.33742	1.22492	up
pme1162	Gallic acid	Benzoic acid derivatives	9	9	9	66900	54800	106000	1.27726	8433.33	13.0419	up
pme1201	Phloretin	Flavanone	123000	327000	374000	1500000	1800000	757000	1.12817	4.92354	2.2997	up
pme1310	N'-Formylkynurenine	Amino acid derivatives	9570	11500	9470	32300	25900	28900	1.26073	2.852	1.51197	up
pme1368	L-Pipecolic acid	Amino acid derivatives	71000	97100	76900	199000	139000	248000	1.1656	2.39184	1.25812	up
pme1417	L-Tryptamine	Tryptamine derivatives	8000000	7810000	6300000	400000	233000	246000	1.27022	0.0397558	-4.65269	down
pme1436	p-Coumaric acid	Hydroxycinnamoyl derivatives	17200000	20100000	20800000	8610000	9210000	9290000	1.2606	0.466609	-1.09971	down
pme1450	Melatonin	Tryptamine derivatives	15800	14600	16900	4500	8070	6130	1.20061	0.395349	-1.3388	down
pme1473	5'-Deoxy-5'-(methylthio)adenosine	Nucleotide and its derivates	57300	40300	47400	28000	17800	16500	1.1686	0.429655	-1.21875	down
pme1478	Myricetin	Flavonol	9	9	9	351000	367000	118000	1.27514	30963	14.9183	up
pme1488	Epigallate catechin gallate (EGCG)	Catechin derivatives	280000	235000	269000	132000	104000	155000	1.2043	0.498724	-1.00369	down
pme1496	Formononetin (4'-O-methyldaidzein)	Isoflavone	9	9	9	67400	63200	41800	1.27773	6385.19	12.6405	up
pme1502	Kumatakenin	Flavonol	915000	2690000	8100000	29600000	31600000	18800000	1.10788	6.83469	2.77288	up
pme1539	Isorhamnetin 3-O-neohesperidoside	Flavonol	22700	33100	29300	8800	7950	9350	1.25128	0.306698	-1.70511	down
pme1541	Acacetin	Flavone	43100	117000	182000	2930000	3430000	2810000	1.24074	26.805	4.74443	up
pme1587	Daidzein 7-O-glucoside (Daidzin)	Isoflavone	98400	158000	130000	9	9	9	1.27779	6.98758e-05	-13.8048	down
pme1600	7-O-Methyleriodictyol	Flavanone	104000	450000	1040000	10800000	7110000	3410000	1.13167	13.3752	3.74148	up
pme1662	sakuranetin	Flavone	47300	94300	72100	825000	263000	206000	1.10858	6.05522	2.59818	up
pme1691	Acetylcholine	Cholines	104000	131000	101000	280000	194000	200000	1.18093	2.00595	1.00429	up
pme1695	Sinapic acid	Hydroxycinnamoyl derivatives	29700	33500	35600	142000	97600	116000	1.25552	3.59919	1.84767	up
pme1777	Cyanidin 3,5-O-diglucoside (Cyanin)	Anthocyanins	98800	98400	114000	9	9	9	1.27848	8.67609e-05	-13.4926	down
pme1814	2,5-dihydroxybenzoic acid (Gentisic acid)	Benzoic acid derivatives	327000	326000	694000	1440000	1470000	2030000	1.18303	3.66741	1.87476	up
pme1816	Neochlorogenic acid (5-O-Caffeoylquinic acid)	Quinate and its derivatives	1120000	1270000	1360000	4890000	3380000	4080000	1.25209	3.29333	1.71955	up
pme1824	Protocatechuic acid	Catechin derivatives	1710000	1800000	3660000	7590000	7890000	10600000	1.18662	3.63738	1.8629	up
pme1841	1,5-Diaminopentane	Phenolamides	468000	706000	693000	4720000	2470000	4720000	1.23159	6.37922	2.67338	up
pme1894	D-Sorbitol	Alcohols and polyols	552000	675000	717000	1120000	1610000	1950000	1.17956	2.40741	1.26748	up
pme1980	Suberic acid	Organic acids	220000	260000	228000	107000	120000	123000	1.25477	0.49435	-1.01639	down
pme2024	serotonin	Tryptamine derivatives	2030000	2650000	2780000	9	9	9	1.27831	3.6193e-06	-18.0759	down
pme2033	L(-)-Malic acid	Organic acids	53300000	55200000	63600000	142000000	130000000	130000000	1.26469	2.33585	1.22395	up
pme2036	Quinic acid	Quinate and its derivatives	918000	1080000	1140000	470000	494000	425000	1.2548	0.442639	-1.1758	down
pme2046	3-N-Methyl-L-histidine	Amino acid derivatives	2620000	2570000	2400000	208000	309000	207000	1.26981	0.0953887	-3.39004	down
pme2108	L-Carnitine	Others	403000	430000	393000	250000	144000	122000	1.15415	0.420881	-1.24852	down
pme2122	Histamine	Amino acid derivatives	775000	905000	784000	1970000	1900000	1400000	1.21949	2.1388	1.0968	up
pme2169	Fumaric acid	Organic acids	157000	195000	249000	609000	700000	596000	1.24217	3.16972	1.66435	up
pme2213	Caffeic acid	Hydroxycinnamoyl derivatives	11600000	12000000	11000000	6280000	6150000	4860000	1.24115	0.499711	-1.00083	down
pme2237	Dulcitol	Alcohols and polyols	363000	549000	512000	1010000	597000	1340000	1.008	2.06952	1.0493	up
pme2253	L-Gulonic-γ-lactone	Carbohydrates	22600	19800	24600	62800	66400	100000	1.2356	3.4209	1.77437	up
pme2256	D-Arabitol	Alcohols and polyols	114000	149000	107000	1180000	574000	722000	1.23964	6.69189	2.74241	up
pme2319	Hesperetin	Flavanone	10400	25500	27800	98400	119000	137000	1.20169	5.56358	2.47601	up
pme2362	Mandelic acid	Organic acids	140000	135000	165000	302000	308000	286000	1.25655	2.03636	1.026	up
pme2366	Phenethylamine	Others	2360000	2440000	2560000	1480000	265000	459000	1.05364	0.299457	-1.73958	down
pme2478	Protocatechuic aldehyde	Catechin derivatives	664000	664000	750000	289000	313000	391000	1.23574	0.477863	-1.06533	down
pme2491	Kaempferol 3,7-dirhamnoside (Kaempferitrin)	Flavonol	9	9	9	13000	15600	13100	1.27838	1544.44	10.5929	up
pme2527	L(+)-Ornithine	Amino acids	195000	265000	203000	738000	819000	535000	1.23246	3.15535	1.6578	up
pme2529	1,5-Anhydro-D-glucitol	Alcohols and polyols	24800	35600	15800	188000	128000	219000	1.23007	7.021	2.81168	up
pme2559	N-Acetylaspartate	Amino acid derivatives	39000	51500	48600	299000	286000	202000	1.25997	5.6578	2.50024	up
pme2566	(5-L-Glutamyl)-L-amino acid	Amino acid derivatives	83800	81500	95300	243000	211000	243000	1.26583	2.6746	1.41932	up
pme2596	4-Pyridoxic acid	Pyridine derivatives	2390000	2490000	2520000	12000000	9980000	11300000	1.27466	4.4973	2.16906	up
pme2607	5-Hydroxyindole-3-acetic acid	Indole derivatives	446000	448000	453000	953000	1510000	1450000	1.23158	2.90497	1.53853	up
pme2651	NADP	Others	10800	9740	11500	55900	62800	60500	1.27518	5.59301	2.48362	up
pme2670	4-Hydroxybenzaldehyde	Benzoic acid derivatives	30500000	35600000	47500000	743000	557000	1550000	1.25943	0.025088	-5.31686	down
pme2706	2,3-Dihydroxybenzoic acid	Organic acids	1810000	2070000	3900000	8350000	8190000	11400000	1.18914	3.59126	1.84449	up
pme2723	Indole-3-carboxaldehyde	Indole derivatives	541000	587000	530000	1850000	1880000	2060000	1.27554	3.49216	1.80412	up
pme2773	L-Cystathionine	Amino acid derivatives	20800	27800	17300	158000	105000	195000	1.24474	6.94992	2.797	up
pme2884	Guanidinoethyl sulfonate	Organic acids	49400	77000	57200	135000	129000	149000	1.21542	2.24946	1.16958	up
pme2901	1-O-Caffeoyl quinic acid	Quinate and its derivatives	1200000	1350000	1600000	5280000	3740000	4550000	1.24776	3.26988	1.70924	up
pme2954	Quercetin	Flavonol	14600	27400	103000	9	9	9	1.26654	0.000186207	-12.3908	down
pme2982	Pinocembrin (Dihydrochrysin)	Flavanone	5650	9340	9960	21800	27700	32300	1.2068	3.27856	1.71306	up
pme2988	3,4-Dihydrocoumarin	Coumarins	392000	491000	335000	143000	141000	241000	1.14915	0.431034	-1.21412	down
pme3011	γ-aminobutyric acid	Organic acids	1330000	3250000	2390000	7280000	3720000	5060000	1.02098	2.30416	1.20424	up
pme3104	1-Methyladenine	Nucleotide and its derivates	744000	801000	761000	214000	151000	87100	1.22145	0.196054	-2.35068	down
pme3151	Deoxyribose 5-phosphate	Nucleotide and its derivates	38000	44800	47100	195000	200000	221000	1.27278	4.74211	2.24553	up
pme3160	D-Glucose 6-phosphate	Carbohydrates	70000	79700	99100	270000	399000	423000	1.24461	4.38907	2.13391	up
pme3208	Glycitin	Isoflavone	35600	35200	40300	100000	63200	114000	1.17924	2.49505	1.31907	up
pme3210	Genistein 7-O-Glucoside (Genistin)	Isoflavone	9	123000	9	4770000	4150000	2600000	1.07563	93.6448	6.54913	up
pme3250	Biochanin A	Isoflavone	9	9	9	410000	446000	362000	1.27843	45111.1	15.4612	up
pme3282	Afzelechin (3,5,7,4'-Tetrahydroxyflavan)	Flavanone	28500	22300	30400	193000	64200	78800	1.12385	4.13793	2.04891	up
pme3292	Prunetin	Isoflavone	49000	114000	168000	3160000	3600000	2950000	1.2513	29.3353	4.87457	up
pme3297	Kaempferol 3-O-rhamnoside (Kaempferin)	Flavonol	12800	30200	47300	121000	135000	98200	1.13052	3.92248	1.97177	up
pme3300	Tricetin	Flavone	3610	12900	23200	114000	209000	268000	1.18043	14.8829	3.89558	up
pme3309	2-Methylglutaric acid	Organic acids	189000	170000	243000	409000	360000	508000	1.19003	2.12126	1.08492	up
pme3313	D-Fructose 6-phosphate	Carbohydrates	55200	103000	62500	303000	308000	353000	1.23919	4.36792	2.12695	up
pme3351	Allysine(6-Oxo DL-Norleucine)	Amino acid derivatives	31800	28200	33900	101000	71300	96600	1.24344	2.86368	1.51787	up
pme3369	Rhamnetin (7-O-methxyl quercetin)	Flavonol	2050	4990	14100	45500	42600	31400	1.11276	5.65279	2.49896	up
pme3382	N-Acetylthreonine	Amino acid derivatives	148000	166000	143000	797000	700000	790000	1.27508	5.00438	2.32319	up
pme3388	H-HomoArg-OH	Amino acid derivatives	975000	1010000	986000	2010000	1880000	2200000	1.26779	2.04981	1.03549	up
pme3392	Pelargonidin 3-O-beta-D-glucoside（Callistephin chloride)	Anthocyanins	1430000	3310000	1830000	22000000	14100000	14900000	1.23471	7.76256	2.95653	up
pme3419	Esculetin (6,7-dihydroxycoumarin)	Coumarins	1430000	2060000	1810000	90600	82300	77200	1.27442	0.0471887	-4.40542	down
pme3422	6-Methoxy-7,8-DihydroxyCoumarin	Coumarins	12700	15600	49700	93400	94500	64500	1.06763	3.2359	1.69417	up
pme3443	Sinapinaldehyde	Hydroxycinnamoyl derivatives	19700	44700	98100	626000	626000	425000	1.19428	10.32	3.36737	up
pme3461	Homoeriodictyol	Flavanone	10000	17400	17600	44100	43800	57800	1.20904	3.23778	1.695	up
pme3473	Butin	Flavone	944000	2890000	2370000	5320000	5010000	6200000	1.07499	2.66441	1.41382	up
pme3478	Pantetheine	Vitamins	852000	773000	950000	58800	112000	65600	1.25996	0.0918058	-3.44527	down
pme3553	Psoralen	Coumarins	19400	26900	24300	9	9	9	1.27797	0.000382436	-11.3525	down
pme3564	Daphnetin	Coumarins	1420000	1790000	1480000	138000	71600	142000	1.2587	0.074968	-3.73758	down
pme3576	Anthranilic acid	Benzoic acid derivatives	69200	68800	63500	153000	132000	156000	1.26379	2.18859	1.13	up
pme3719	D-Xylonic acid	Organic acids	2960000	3390000	3770000	8600000	8140000	9060000	1.26176	2.54941	1.35016	up
pme3970	β-Pseudouridine	Nucleotide and its derivates	495000	501000	544000	271000	215000	283000	1.23899	0.499351	-1.00187	down
