# Supplementary material for: Metabolite Profiling of Sorghum Seeds of Different Colors from Different Sweet Sorghum Cultivars Using a Widely Targeted Metabolomics Approach
Source: Int J Genomics. 2020 Mar 4;2020:6247429. doi: 10.1155/2020/6247429 (PMC7073482; doi:10.1155/2020/6247429)
Supplement: Supplementary 4 — Table S2: the metabolite and its corresponding content between Z6 vs. Z27. [file 6247429.f4.xlsx]

## Sheet: Sheet1
Table 2s. The metabolite and its corresponding content between Z6 VS Z27
Index	Compounds	Class	Z6-1	Z6-2	Z6-3	Z27-1	Z27-2	Z27-3	VIP	Fold_Change	Log2FC	Type
pma0104	N-sinapoyl hydroxycoumarin	Coumarins	9	9	9	270000	236000	195000	1.32443	25963	14.6642	up
pma0170	N', N''-Diferuloylspermidine	Phenolamides	15900000	15900000	11600000	25600000	29000000	33200000	1.24869	2.02304	1.01653	up
pma0680	N', N''-Feruloyl,caffeoylspermidine	Phenolamides	18200000	16100000	14600000	30100000	40900000	35500000	1.27705	2.17791	1.12295	up
pma0724	Naringenin C-hexoside	Flavone C-glycosides	61800	53600	100000	1590000	1230000	1330000	1.3116	19.2665	4.26802	up
pma0825	Chrysin O-malonylhexoside	Flavone	3500	7150	6730	11100	14200	14100	1.15441	2.26697	1.18077	up
pma0948	Hydroxyphenethylamine	Others	283000	267000	269000	86200	134000	120000	1.2673	0.415385	-1.26748	down
pma1116	Kaempferide	Flavonol	394000	580000	479000	6270000	5380000	8740000	1.31324	14.033	3.81076	up
pma1590	Peonidin O-hexoside	Anthocyanins	9	162000	9	603000	429000	584000	1.01401	9.9742	3.3182	up
pma3724	1-O-Feruloyl quinic acid	Quinate and its derivatives	1060000	1520000	1300000	3930000	3400000	3960000	1.29552	2.90979	1.54092	up
pma6218	O-methylnaringenin C-pentoside	Flavone C-glycosides	37200	9	9	445000	487000	509000	1.0945	38.7178	5.27493	up
pma6270	sn-Glycero-3-phosphocholine	Cholines	5750000	6140000	5460000	14400000	14300000	13200000	1.31821	2.41499	1.27201	up
pma6389	Ayanin	Flavonol	8820	11700	11000	53600	57800	51400	1.31635	5.16497	2.36876	up
pma6460	5-O-p-Coumaroylquinic acid	Quinate and its derivatives	21200	26200	22500	128000	91800	128000	1.30851	4.97568	2.31489	up
pma6561	Caffeic acid O-glucoside	Hydroxycinnamoyl derivatives	2890000	2910000	3210000	1270000	1280000	1080000	1.31307	0.402886	-1.31156	down
pma6647	C-hexosyl-chrysoeriol O-hexoside	Flavone C-glycosides	362000	467000	530000	167000	144000	109000	1.27675	0.309051	-1.69408	down
pmb0069	Benzamide	Others	437000	491000	527000	70900	108000	55200	1.29542	0.160893	-2.63582	down
pmb0159	DGMG (18:2) isomer2	Lipids_Glycerolipids	155000	238000	258000	494000	1090000	614000	1.19426	3.37634	1.75546	up
pmb0160	MAG (18:3) isomer5	Lipids_Glycerolipids	1960000	2570000	2730000	5020000	13100000	7650000	1.18957	3.54959	1.82765	up
pmb0161	DGMG (18:2) isomer1	Lipids_Glycerolipids	2570000	3340000	3500000	5880000	12500000	6530000	1.16003	2.64718	1.40446	up
pmb0163	DGMG (18:2) isomer3	Lipids_Glycerolipids	2620000	3040000	3150000	1250000	724000	876000	1.27276	0.323496	-1.62818	down
pmb0164	MAG (18:2) isomer1	Lipids_Glycerolipids	265000	286000	275000	96800	65000	93200	1.29495	0.308717	-1.69564	down
pmb0292	Cholesterol	Others	1650000	1290000	2300000	603000	684000	1280000	1.04603	0.489885	-1.02948	down
pmb0322	3’,4’,5’-Tricetin O-rutinoside	Flavone	687000	805000	1450000	437000	465000	528000	1.08851	0.486064	-1.04078	down
pmb0382	O-Feruloyl 4-hydroxylcoumarin	Coumarins	1050000	808000	1040000	2970000	2350000	2940000	1.29349	2.85024	1.51108	up
pmb0423	Hydroxy-methoxycinnamate	Hydroxycinnamoyl derivatives	348000	413000	363000	3580000	3890000	3090000	1.32081	9.39502	3.2319	up
pmb0464	Aspartic acid di-O-glucoside	Amino acid derivatives	5500000	6280000	6150000	2540000	3420000	2500000	1.27301	0.471835	-1.08365	down
pmb0496	N-Feruloyl agmatine	Phenolamides	300000	224000	246000	98000	49600	88400	1.24043	0.306494	-1.70607	down
pmb0569	Syringetin 5-O-hexoside	Flavone	9	9	71700	790000	783000	900000	1.07631	34.4823	5.10778	up
pmb0602	Syringetin 7-O-hexoside	Flavone	9	9	9	1540000	1810000	1740000	1.32486	188519	17.5243	up
pmb0618	8-C-hexosyl-hesperetin O-hexoside	Flavone C-glycosides	489000	430000	468000	996000	1210000	938000	1.29579	2.26676	1.18063	up
pmb0626	6-C-hexosyl-apigenin O-hexosyl-O-hexoside	Flavone C-glycosides	9	9	9	64300	51600	41600	1.324	5833.33	12.5101	up
pmb0628	Eriodictiol C-hexosyl-O-hexoside	Flavone C-glycosides	9	9	9	326000	349000	317000	1.32481	36740.7	15.1651	up
pmb0631	C-hexosyl-luteolin C-pentoside	Flavone C-glycosides	93300	150000	263000	515000	349000	485000	1.12706	2.66443	1.41383	up
pmb0681	Apigenin 8-C-pentoside	Flavone C-glycosides	9	11600	9	38300	31800	24900	1.02207	8.17697	3.03157	up
pmb0696	8-C-hexosyl chrysoeriol O-hexoside	Flavone C-glycosides	162000	183000	219000	71000	62800	70300	1.30252	0.361879	-1.46642	down
pmb0701	Chrysoeriol 8-C-hexoside	Flavone C-glycosides	1100000	1550000	1440000	339000	369000	343000	1.30842	0.256968	-1.96034	down
pmb0711	Quercetin 7-O-rutinoside	Flavonol	136000	470000	141000	4700000	5510000	6020000	1.28534	21.7269	4.44141	up
pmb0713	Tricin 7-O-hexosyl-O-hexoside	Flavone	25300	57100	141000	243000	274000	173000	1.04774	3.08863	1.62697	up
pmb0720	Tricin O-malonylhexoside	Flavone	76900	165000	650000	1340000	1700000	1300000	1.11143	4.86602	2.28274	up
pmb0776	N-Feruloyl tryptamine	Tryptamine derivatives	65800	50400	27000	170000	230000	209000	1.24501	4.25279	2.08841	up
pmb0808	6,7-dihydroxycoumarin 6-O-quinic acid	Coumarins	9	9	9	115000	137000	118000	1.32477	13703.7	13.7423	up
pmb0837	Procyanidin A3	Proanthocyanidins	9	9	9	6670000	8090000	7400000	1.32484	820741	19.6466	up
pmb0848	LysoPC 16:1 (2n isomer)	Lipids_Glycerophospholipids	4880000	4170000	3730000	12300000	37800000	18500000	1.21978	5.36776	2.42432	up
pmb0859	LysoPC 18:1 (2n isomer)	Lipids_Glycerophospholipids	2620000	2100000	1990000	4510000	8890000	6000000	1.22533	2.89121	1.53167	up
pmb0863	LysoPC 16:2 (2n isomer)	Lipids_Glycerophospholipids	2630000	2080000	1950000	7790000	19100000	11200000	1.26044	5.71922	2.51582	up
pmb0865	LysoPC 18:3 (2n isomer)	Lipids_Glycerophospholipids	3410000	2980000	2900000	9740000	25600000	15000000	1.25135	5.41873	2.43795	up
pmb0873	LysoPC 18:2 (2n isomer)	Lipids_Glycerophospholipids	8380000	6660000	5930000	20500000	48900000	31300000	1.24971	4.8021	2.26366	up
pmb0880	LysoPE 18:0 (2n isomer)	Lipids_Glycerophospholipids	214000	215000	263000	52400	39800	51200	1.31246	0.207225	-2.27073	down
pmb0890	MAG (18:2)	Lipids_Glycerolipids	7330000	11100000	11400000	15800000	21500000	23100000	1.17805	2.02481	1.01778	up
pmb1605	MAG (18:3) isomer3	Lipids_Glycerolipids	1070000	944000	1090000	367000	536000	511000	1.26038	0.455541	-1.13435	down
pmb1656	MAG (18:3) isomer4	Lipids_Glycerolipids	65100	82000	82700	119000	224000	193000	1.18548	2.33246	1.22185	up
pmb1754	O-Phosphocholine	Cholines	1560000	1800000	1710000	4580000	3480000	3640000	1.29012	2.30769	1.20645	up
pmb2251	DGMG (18:1)	Lipids_Glycerolipids	1140000	1700000	1790000	3100000	7460000	4260000	1.173	3.20086	1.67846	up
pmb2383	MGMG (18:2) isomer2	Lipids_Glycerolipids	100000	138000	128000	203000	407000	224000	1.1323	2.27869	1.1882	up
pmb2388	LysoPC 18:0 (2n isomer)	Lipids_Glycerophospholipids	5710000	4680000	4210000	9260000	21100000	12800000	1.1897	2.95616	1.56373	up
pmb2507	2-Deoxyribose 1-phosphate	Carbohydrates	126000	178000	203000	851000	896000	1220000	1.29853	5.85207	2.54895	up
pmb2554	5-O-Feruloyl quinic acid glucoside	Quinate and its derivatives	22800	28200	18800	81100	71300	97900	1.2924	3.58596	1.84236	up
pmb2657	Argininosuccinate	Organic acids	6950	5500	7960	14000	23800	18000	1.23967	2.73395	1.45099	up
pmb2795	4-Methoxycinnamic acid	Hydroxycinnamoyl derivatives	163000	201000	230000	352000	459000	446000	1.25196	2.11616	1.08145	up
pmb2831	Protocatechuic acid O-glucoside	Catechin derivatives	138000	165000	184000	793000	656000	835000	1.31105	4.68994	2.22957	up
pmb2833	3-O-Feruloyl quinic acid glucoside	Quinate and its derivatives	17000	18000	17200	71000	51800	77000	1.30346	3.82759	1.93643	up
pmb2858	Maltotetraose	Carbohydrates	47600	23500	25800	92700	119000	200000	1.21667	4.24871	2.08702	up
pmb2871	2,5-dihydroxy benzoic acid O-hexside	Benzoic acid derivatives	613000	733000	978000	6220000	5110000	5960000	1.30992	7.43976	2.89526	up
pmb2922	Uridine 5'-diphospho-D-glucose	Nucleotide and its derivates	78200	120000	120000	386000	332000	433000	1.28544	3.61722	1.85488	up
pmb2928	Gallic acid O-Hexoside	Benzoic acid derivatives	26200	31000	30500	72500	88200	74000	1.30666	2.67617	1.42017	up
pmb2940	1-O-beta-D-Glucopyranosyl sinapate	Hydroxycinnamoyl derivatives	13500	21800	39600	883000	865000	789000	1.30435	33.8718	5.08201	up
pmb2954	Luteolin O-hexosyl-O-hexosyl-O-hexoside	Flavone	9	9	41600	237000	208000	217000	1.04499	15.9066	3.99155	up
pmb2957	Cyanidin O-syringic acid	Anthocyanins	51400	49200	75300	296000	377000	301000	1.30269	5.53724	2.46917	up
pmb2991	Apigenin O-hexosyl-O-rutinoside	Flavone	75300	100000	120000	14600	13700	5690	1.27212	0.115103	-3.119	down
pmb2999	Chrysoeriol 5-O-hexoside	Flavone	317000	463000	761000	3820000	2320000	4210000	1.25939	6.71642	2.74769	up
pmb3013	Isorhamnetin O-acetyl-hexoside	Flavonol	9	9	9	16800	17300	13500	1.32438	1762.96	10.7838	up
pmb3014	Luteolin O-eudesmic acid-O-hexoside	Flavone	9	9	9	69100	87900	88400	1.32479	9088.89	13.1499	up
pmb3023	Eriodictyol C-hexoside	Flavone C-glycosides	21400	42800	32000	2200000	2010000	2130000	1.31881	65.9044	6.0423	up
pmb3024	Luteolin C-hexoside	Flavone C-glycosides	463000	663000	1130000	344000	372000	301000	1.07535	0.450798	-1.14945	down
pmb3044	Tricin di-O-hexoside	Flavone	9	5590	9	71900	66400	56500	1.11956	34.7361	5.11836	up
pmb3056	Homovanilloyl quinic acid	Quinate and its derivatives	9	9	9	3980	4680	8360	1.32223	630.37	9.30006	up
pmb3062	Eudesmoyl quinic acid	Quinate and its derivatives	7370	11100	11200	34900	30700	46700	1.27706	3.78497	1.92028	up
pmb3074	3-O-p-Coumaroyl quinic acid	Quinate and its derivatives	415000	557000	685000	2000000	1440000	2330000	1.25951	3.4822	1.8	up
pmb3075	3-O-p-Coumaroyl shikimic acid	Quinate and its derivatives	20800	33400	33500	9	9	9	1.32391	0.000307868	-11.6654	down
pmb3093	6,7-dihydroxycoumarin 7-O-quinic acid	Coumarins	10000	12900	14600	121000	133000	115000	1.31723	9.84	3.29866	up
pmb3107	Syringic acid O-glucoside	Benzoic acid derivatives	4300	5610	6110	28200	34800	28600	1.31098	5.71785	2.51547	up
pmb3114	Epicatechin-epiafzelechin	Catechin derivatives	9	9	9	24300	27400	27300	1.32486	2925.93	11.5147	up
pmc0281	Adenosine O-ribose	Nucleotide and its derivates	3700000	5460000	5690000	1950000	2160000	1900000	1.26242	0.404714	-1.30503	down
pmc0682	4-Aminoindole	Indole derivatives	61400	66900	72500	146000	153000	171000	1.30917	2.34064	1.2269	up
pmc0960	LysoPC 20:4	Lipids_Glycerophospholipids	325000	263000	272000	462000	810000	648000	1.21045	2.23256	1.1587	up
pmd0130	LysoPC 14:0 (2n isomer)	Lipids_Glycerophospholipids	1440000	1490000	1430000	2500000	4390000	3290000	1.23328	2.33486	1.22334	up
pmd0144	LysoPC 20:1 (2n isomer)	Lipids_Glycerophospholipids	527000	414000	423000	1070000	3160000	1700000	1.20125	4.34751	2.12019	up
pmd0145	LysoPC 20:1	Lipids_Glycerophospholipids	547000	449000	430000	1160000	3920000	1810000	1.1865	4.8317	2.27253	up
pme0001	Hesperetin 7-O-neohesperidoside (Neohesperidin)	Flavanone	462000	452000	618000	221000	180000	222000	1.27926	0.406658	-1.29811	down
pme0005	Purine	Nucleotide and its derivates	48800	50100	40300	15100	20800	22500	1.25888	0.41954	-1.25312	down
pme0122	N6-Acetyl-L-lysine	Amino acid derivatives	214000	310000	302000	516000	642000	865000	1.21885	2.44915	1.29228	up
pme0137	Nα-Acetyl-L-glutamine	Amino acid derivatives	100000	121000	138000	393000	409000	407000	1.30882	3.36769	1.75176	up
pme0166	1-Methylxanthine	Nucleotide and its derivates	75100	75700	70800	171000	134000	142000	1.29293	2.01715	1.01232	up
pme0170	Nα-Acetyl-L-arginine	Amino acid derivatives	158000	131000	101000	9	9	9	1.32421	6.92308e-05	-13.8182	down
pme0183	2-Hydroxy-6-aminopurine	Nucleotide and its derivates	5090000	5600000	6410000	1830000	2350000	2030000	1.30059	0.363158	-1.46133	down
pme0197	Quercetin 3-O-rutinoside (Rutin)	Flavonol	26700	78100	34100	968000	893000	881000	1.29679	19.7408	4.30311	up
pme0205	Catechin	Catechin derivatives	9	9	9	3400000	3580000	3220000	1.3248	377778	18.5272	up
pme0246	L-Cysteine	Amino acids	32100	31900	29800	12700	21500	9400	1.14322	0.464819	-1.10526	down
pme0252	N-Acetyl-l-leucine	Amino acid derivatives	70200	72600	75600	32400	34500	36500	1.31654	0.473443	-1.07874	down
pme0295	4-Acetamidobutyric acid	Organic acids	313000	373000	402000	895000	996000	1490000	1.26791	3.10754	1.63577	up
pme0307	Resveratrol	Hydroxycinnamoyl derivatives	3440	8020	8330	51300	81200	61200	1.27812	9.78777	3.29098	up
pme0330	Naringenin 7-O-neohesperidoside (Naringin)	Flavanone	246000	330000	446000	110000	128000	96200	1.25345	0.327006	-1.61261	down
pme0359	Apigenin 5-O-glucoside	Flavone	456000	463000	298000	1210000	1220000	1490000	1.28172	3.22104	1.68752	up
pme0371	Naringenin 7-O-glucoside (Prunin)	Flavanone	190000	186000	184000	757000	899000	930000	1.32096	4.61786	2.20722	up
pme0376	Naringenin	Flavanone	781000	2320000	1860000	7130000	7750000	4800000	1.18326	3.96694	1.98803	up
pme0398	Chlorogenic acid (3-O-Caffeoylquinic acid)	Quinate and its derivatives	4810000	5180000	6770000	61800000	59300000	51400000	1.31718	10.2924	3.3635	up
pme0413	Vanillin	Benzoic acid derivatives	2430000	2410000	3100000	1250000	1070000	964000	1.28693	0.413602	-1.27368	down
pme0418	3-(4-Hydroxyphenyl)propionic acid	Hydroxycinnamoyl derivatives	111000	117000	123000	44900	48300	44500	1.32055	0.392308	-1.34994	down
pme0432	Procyanidin A2	Proanthocyanidins	9	9	9	219000	284000	276000	1.3248	28851.9	14.8164	up
pme0434	Procyanidin B2	Proanthocyanidins	11500	4660	1810	11000000	12800000	11400000	1.31336	1958.82	10.9358	up
pme0436	Procyanidin B3	Proanthocyanidins	9	9	9	12100000	12900000	14600000	1.32488	1.46667e+06	20.4841	up
pme0442	Delphinidin	Anthocyanins	9	9	9	344000	335000	380000	1.32486	39222.2	15.2594	up
pme0450	L-Epicatechin	Catechin derivatives	9	64400	107000	104000000	107000000	100000000	1.13528	1814.37	10.8253	up
pme0513	Xylitol	Alcohols and polyols	49700	80100	58700	169000	183000	235000	1.27128	3.11406	1.6388	up
pme0534	Gluconic acid	Carbohydrates	3050000	3690000	3400000	20400000	18000000	28100000	1.31044	6.55819	2.7133	up
pme1021	D-(+)-Glucono-1,5-lactone	Carbohydrates	19000	23100	10600	79400	78000	94700	1.27131	4.78368	2.25812	up
pme1055	L-Kynurenine	Amino acid derivatives	32800	28900	57200	18100	17100	16600	1.17045	0.43566	-1.19872	down
pme1097	Adenine	Nucleotide and its derivates	1850000	2110000	2120000	612000	638000	640000	1.32055	0.310855	-1.68569	down
pme1109	Guanine	Nucleotide and its derivates	66900000	71200000	80800000	14700000	19100000	17000000	1.31395	0.232069	-2.10737	down
pme1162	Gallic acid	Benzoic acid derivatives	9	9	9	99700	103000	133000	1.32477	12433.3	13.6019	up
pme1175	Guanosine	Nucleotide and its derivates	14100000	14000000	15900000	6930000	7430000	6150000	1.30541	0.466136	-1.10118	down
pme1181	Deoxyguanosine	Nucleotide and its derivates	284000	439000	490000	169000	163000	180000	1.22927	0.422094	-1.24436	down
pme1292	Homogentisic acid	Organic acids	601000	597000	679000	3120000	2760000	2630000	1.31884	4.53383	2.18073	up
pme1294	Xanthosine	Nucleotide and its derivates	10800000	10100000	10700000	4640000	3930000	4740000	1.31117	0.421203	-1.24741	down
pme1398	Delphinidin 3-O-glucoside (Mirtillin)	Anthocyanins	2540000	3870000	8500000	1230000	1890000	1080000	1.10329	0.28169	-1.82782	down
pme1417	L-Tryptamine	Tryptamine derivatives	8000000	7810000	6300000	2210000	2420000	2230000	1.3113	0.310267	-1.68842	down
pme1424	Coniferylaldehyde	Hydroxycinnamoyl derivatives	25600	51700	44600	19900	19000	15100	1.14242	0.442986	-1.17467	down
pme1436	p-Coumaric acid	Hydroxycinnamoyl derivatives	17200000	20100000	20800000	6970000	6890000	6640000	1.31664	0.35284	-1.50291	down
pme1478	Myricetin	Flavonol	9	9	9	64900	97200	65600	1.32427	8433.33	13.0419	up
pme1496	Formononetin (4'-O-methyldaidzein)	Isoflavone	9	9	9	7740	24900	3810	1.30791	1350	10.3987	up
pme1521	Dihydroquercetin (Taxifolin)	Flavonol	37100	31000	30100	19400000	22500000	24400000	1.32456	675.153	9.39907	up
pme1537	(+)-Gallocatechin (GC)	Catechin derivatives	9	9	9	158000	191000	188000	1.32484	19888.9	14.2797	up
pme1539	Isorhamnetin 3-O-neohesperidoside	Flavonol	22700	33100	29300	172000	147000	182000	1.3115	5.88719	2.55758	up
pme1580	Eriodictyol	Flavanone	626000	1590000	2110000	8690000	17100000	5590000	1.18639	7.25381	2.85874	up
pme1587	Daidzein 7-O-glucoside (Daidzin)	Isoflavone	98400	158000	130000	9	9	9	1.32428	6.98758e-05	-13.8048	down
pme1588	Isorhamnetin	Flavonol	9	9	9	10500	10900	12700	1.32482	1262.96	10.3026	up
pme1598	Hesperetin 5-O-glucoside	Flavanone	340000	402000	376000	5990000	5680000	6520000	1.32368	16.2701	4.02415	up
pme1611	Isohemiphloin	Flavone	93700	86200	93400	624000	432000	682000	1.30931	6.35931	2.66887	up
pme1695	Sinapic acid	Hydroxycinnamoyl derivatives	29700	33500	35600	104000	105000	81800	1.30193	2.94332	1.55744	up
pme1712	L-Saccharopine	Amino acid derivatives	503000	553000	556000	1430000	1290000	1230000	1.31379	2.45037	1.293	up
pme1777	Cyanidin 3,5-O-diglucoside (Cyanin)	Anthocyanins	98800	98400	114000	121000	408000	538000	1.00489	3.42866	1.77765	up
pme1814	2,5-dihydroxybenzoic acid (Gentisic acid)	Benzoic acid derivatives	327000	326000	694000	7800000	6830000	7130000	1.3029	16.1544	4.01386	up
pme1816	Neochlorogenic acid (5-O-Caffeoylquinic acid)	Quinate and its derivatives	1120000	1270000	1360000	11400000	12100000	11900000	1.32288	9.44	3.23879	up
pme1824	Protocatechuic acid	Catechin derivatives	1710000	1800000	3660000	42900000	37900000	40200000	1.30452	16.8759	4.07689	up
pme1841	1,5-Diaminopentane	Phenolamides	468000	706000	693000	1850000	2270000	2460000	1.28615	3.52437	1.81737	up
pme2046	3-N-Methyl-L-histidine	Amino acid derivatives	2620000	2570000	2400000	709000	647000	523000	1.31412	0.247563	-2.01413	down
pme2169	Fumaric acid	Organic acids	157000	195000	249000	549000	566000	646000	1.28152	2.93012	1.55096	up
pme2213	Caffeic acid	Hydroxycinnamoyl derivatives	11600000	12000000	11000000	6250000	5850000	5050000	1.30219	0.495665	-1.01256	down
pme2253	L-Gulonic-γ-lactone	Carbohydrates	22600	19800	24600	55700	81700	91000	1.28145	3.40896	1.76933	up
pme2256	D-Arabitol	Alcohols and polyols	114000	149000	107000	321000	331000	437000	1.28431	2.94324	1.55741	up
pme2319	Hesperetin	Flavanone	10400	25500	27800	64100	42500	69400	1.11207	2.76295	1.46621	up
pme2362	Mandelic acid	Organic acids	140000	135000	165000	64100	74700	76500	1.2902	0.489318	-1.03116	down
pme2366	Phenethylamine	Others	2360000	2440000	2560000	379000	572000	371000	1.30753	0.17962	-2.47698	down
pme2435	L-Fucose	Carbohydrates	8570	12300	11400	12500	34500	31000	1.0153	2.41711	1.27328	up
pme2491	Kaempferol 3,7-dirhamnoside (Kaempferitrin)	Flavonol	9	9	9	28900	25000	36300	1.32453	3340.74	11.706	up
pme2563	γ-Glu-Cys	Amino acid derivatives	30700	34400	36300	79800	58600	73000	1.27264	2.08481	1.05992	up
pme2598	3,4-Dihydroxybenzeneacetic acid	Organic acids	659000	642000	726000	3210000	2970000	2870000	1.32115	4.46473	2.15857	up
pme2603	3-Hydroxyanthranilic acid	Organic acids	9	9	18200	106000	93900	95700	1.05569	16.2257	4.02021	up
pme2607	5-Hydroxyindole-3-acetic acid	Indole derivatives	446000	448000	453000	179000	221000	185000	1.30878	0.434298	-1.20324	down
pme2651	NADP	Others	10800	9740	11500	55300	44700	34100	1.29445	4.18539	2.06536	up
pme2670	4-Hydroxybenzaldehyde	Benzoic acid derivatives	30500000	35600000	47500000	4530000	3700000	4360000	1.31427	0.110827	-3.17361	down
pme2706	2,3-Dihydroxybenzoic acid	Organic acids	1810000	2070000	3900000	44500000	38800000	41200000	1.30502	16.0026	4.00023	up
pme2773	L-Cystathionine	Amino acid derivatives	20800	27800	17300	42100	63500	51900	1.22642	2.38998	1.257	up
pme2786	N-Acetyl-5-hydroxytryptamine	Tryptamine derivatives	9	44700	9	441000	519000	636000	1.08926	35.6903	5.15746	up
pme2895	Dihydromyricetin	Flavonol	9	9	9	177000	243000	213000	1.32473	23444.4	14.517	up
pme2901	1-O-Caffeoyl quinic acid	Quinate and its derivatives	1200000	1350000	1600000	13900000	14600000	12700000	1.31992	9.92771	3.31146	up
pme2903	4-Hydroxybenzoic acid	Organic acids	3750000	3880000	5400000	1720000	1550000	1950000	1.2712	0.400614	-1.31972	down
pme2949	Hesperetin 7-rutinoside (Hesperidin)	Flavanone	422000	431000	590000	224000	161000	244000	1.231	0.435897	-1.19794	down
pme2963	Aromadedrin (Dihydrokaempferol)	Flavonol	51200	70500	69900	683000	597000	720000	1.31806	10.4384	3.38383	up
pme3005	N,N-Dimethylformamide	Organic acids	1560000	1890000	1520000	5740000	3810000	3240000	1.22796	2.57344	1.3637	up
pme3083	2-(Formylamino)benzoic acid	Organic acids	1900000	2200000	2330000	843000	1140000	743000	1.26198	0.42395	-1.23803	down
pme3129	Quercetin 4'-O-glucoside (Spiraeoside)	Flavonol	241000	322000	539000	4620000	4260000	5210000	1.30166	12.7858	3.67648	up
pme3151	Deoxyribose 5-phosphate	Nucleotide and its derivates	38000	44800	47100	72800	115000	143000	1.205	2.54657	1.34856	up
pme3160	D-Glucose 6-phosphate	Carbohydrates	70000	79700	99100	191000	179000	280000	1.24639	2.61254	1.38545	up
pme3210	Genistein 7-O-Glucoside (Genistin)	Isoflavone	9	123000	9	1240000	1210000	1330000	1.07166	30.7272	4.94144	up
pme3211	Quercetin 3-O-glucoside (Isotrifoliin)	Flavonol	285000	362000	474000	5390000	4890000	5310000	1.31586	13.9072	3.79776	up
pme3313	D-Fructose 6-phosphate	Carbohydrates	55200	103000	62500	156000	143000	230000	1.16932	2.39692	1.26118	up
pme3392	Pelargonidin 3-O-beta-D-glucoside（Callistephin chloride)	Anthocyanins	1430000	3310000	1830000	10300000	10800000	9810000	1.26572	4.70472	2.23411	up
pme3419	Esculetin (6,7-dihydroxycoumarin)	Coumarins	1430000	2060000	1810000	237000	186000	269000	1.30992	0.130566	-2.93715	down
pme3428	Esculin (6,7-Dihydroxycoumarin-6-glucoside)	Coumarins	933000	891000	944000	367000	238000	321000	1.29114	0.334538	-1.57976	down
pme3461	Homoeriodictyol	Flavanone	10000	17400	17600	41300	31200	36800	1.20858	2.42889	1.2803	up
pme3473	Butin	Flavone	944000	2890000	2370000	8910000	9910000	5990000	1.17648	3.99903	1.99965	up
pme3478	Pantetheine	Vitamins	852000	773000	950000	274000	225000	225000	1.31356	0.281165	-1.83051	down
pme3514	Morin	Flavonol	56400	57100	90700	250000	411000	315000	1.2784	4.77963	2.2569	up
pme3564	Daphnetin	Coumarins	1420000	1790000	1480000	172000	193000	218000	1.31806	0.124307	-3.00802	down
pme3705	D-glucoronic acid	Carbohydrates	301000	382000	453000	2170000	3120000	2140000	1.30269	6.54049	2.7094	up
pme3882	2'-Deoxyuridine	Nucleotide and its derivates	5980	16900	14300	9	9	9	1.31959	0.000726197	-10.4274	down
pme3960	Deoxyadenosine	Nucleotide and its derivates	19300	31500	30400	11900	11300	13000	1.22393	0.445813	-1.16549	down
pme3965	2-(dimethylamino)guanosine	Nucleotide and its derivates	373000	425000	499000	206000	187000	203000	1.29184	0.459522	-1.12179	down
