# Supplementary material for: Metabolite Profiling of Sorghum Seeds of Different Colors from Different Sweet Sorghum Cultivars Using a Widely Targeted Metabolomics Approach
Source: Int J Genomics. 2020 Mar 4;2020:6247429. doi: 10.1155/2020/6247429 (PMC7073482; doi:10.1155/2020/6247429)
Supplement: Supplementary 5 — Table S3: the metabolite and its corresponding content between Z27 vs. HC4. [file 6247429.f5.xlsx]

## Sheet: Sheet1
Table 4s. The metabolite and its corresponding content between Z27 VS HC4
Index	Compounds	Class	Z27-1	Z27-2	Z27-3	HC4-1	HC4-2	HC4-3	VIP	Fold_Change	Log2FC	Type
pma0104	N-sinapoyl hydroxycoumarin	Coumarins	270000	236000	195000	9	9	9	1.30605	3.85164e-05	-14.6642	down
pma0110	O-Sinapoyl quinic acid	Quinate and its derivatives	66000	61500	58100	193000	232000	117000	1.21059	2.92026	1.5461	up
pma0149	Sinapoyl malate	Organic acids	1350000	1390000	1400000	7060000	7530000	4200000	1.2663	4.53865	2.18226	up
pma0170	N', N''-Diferuloylspermidine	Phenolamides	25600000	29000000	33200000	14500000	12000000	7460000	1.20143	0.386788	-1.37038	down
pma0253	O-methylChrysoeriol 5-O-hexoside	Flavone	602000	833000	669000	5850000	5950000	2970000	1.26392	7.01996	2.81146	up
pma0680	N', N''-Feruloyl,caffeoylspermidine	Phenolamides	30100000	40900000	35500000	13500000	14400000	8360000	1.23276	0.340469	-1.5544	down
pma0724	Naringenin C-hexoside	Flavone C-glycosides	1590000	1230000	1330000	9	9	9	1.30625	6.50602e-06	-17.2298	down
pma0795	Tricetin O-malonylhexoside	Flavone	171000	170000	223000	381000	539000	244000	1.05624	2.06383	1.04532	up
pma0825	Chrysin O-malonylhexoside	Flavone	11100	14200	14100	55800	48500	55300	1.29538	4.05076	2.01819	up
pma1116	Kaempferide	Flavonol	6270000	5380000	8740000	3540000	2990000	2220000	1.18552	0.429132	-1.22051	down
pma6389	Ayanin	Flavonol	53600	57800	51400	23700	32900	24100	1.24581	0.4957	-1.01246	down
pma6558	Velutin	Flavone	192000	295000	156000	3490000	3950000	2180000	1.28309	14.9611	3.90315	up
pma6586	Tricin O-glycerylhexoside	Flavone	100000	71300	91600	9	9	9	1.30612	0.000102701	-13.2493	down
pma6638	O-methylChrysoeriol 7-O-hexoside	Flavone	581000	734000	593000	6110000	6010000	3050000	1.27055	7.95073	2.99109	up
pmb0159	DGMG (18:2) isomer2	Lipids_Glycerolipids	494000	1090000	614000	289000	138000	173000	1.16765	0.272975	-1.87316	down
pmb0160	MAG (18:3) isomer5	Lipids_Glycerolipids	5020000	13100000	7650000	3320000	1610000	2130000	1.14219	0.273962	-1.86795	down
pmb0161	DGMG (18:2) isomer1	Lipids_Glycerolipids	5880000	12500000	6530000	3030000	1460000	1710000	1.18198	0.248896	-2.00638	down
pmb0277	Tricin	Flavone	3490000	4750000	2890000	419000	947000	1100000	1.19981	0.221563	-2.17421	down
pmb0322	3’,4’,5’-Tricetin O-rutinoside	Flavone	437000	465000	528000	1800000	1440000	1400000	1.28815	3.24476	1.69811	up
pmb0325	N-Feruloyl spermidine	Phenolamides	73200	78000	63100	9	9	9	1.30611	0.000125992	-12.9544	down
pmb0382	O-Feruloyl 4-hydroxylcoumarin	Coumarins	2970000	2350000	2940000	860000	853000	548000	1.26735	0.273729	-1.86918	down
pmb0449	2-Aminoadipic acid (L-Homoglutamic acid)	Amino acids	1650000	1660000	2260000	9150000	3220000	3950000	1.07459	2.92998	1.55089	up
pmb0468	N-formylmethionine	Amino acid derivatives	129000	199000	95800	9	9	9	1.30477	6.37093e-05	-13.9381	down
pmb0541	Cyanidin 3-O-glucosyl-malonylglucoside	Anthocyanins	9	9	9	342000	248000	129000	1.30396	26629.6	14.7007	up
pmb0557	Cyanidin O-malonyl-malonylhexoside	Anthocyanins	9	9	9	29100000	20900000	9850000	1.30484	2.21667e+06	21.08	up
pmb0563	Peonidin	Anthocyanins	5930000	4140000	7940000	2730000	2560000	1860000	1.17481	0.397002	-1.33278	down
pmb0579	Chrysoeriol O-sinapoylhexoside	Flavone	17600	29700	13000	142000	125000	114000	1.2646	6.31841	2.65956	up
pmb0588	Luteolin 3',7-di-O-glucoside	Flavone	368000	362000	291000	697000	1140000	766000	1.22656	2.54946	1.35019	up
pmb0601	Chrysoeriol O-hexosyl-O-pentoside	Flavone	81600	71800	74500	33800	41500	27300	1.24809	0.450197	-1.15137	down
pmb0603	Chrysoeriol O-hexosyl-O-hexoside	Flavone	31400	27400	34300	58800	91800	104000	1.22289	2.73469	1.45138	up
pmb0608	Chrysoeriol O-malonylhexoside	Flavone	971000	1040000	1020000	3650000	4750000	3180000	1.2853	3.82052	1.93377	up
pmb0624	6-C-hexosyl-luteolin O-hexoside	Flavone C-glycosides	162000	203000	141000	2580000	2310000	518000	1.17272	10.6877	3.41789	up
pmb0626	6-C-hexosyl-apigenin O-hexosyl-O-hexoside	Flavone C-glycosides	64300	51600	41600	266000	252000	131000	1.22165	4.12063	2.04287	up
pmb0652	C-hexosyl-apigenin O-pentoside	Flavone C-glycosides	77100	74900	104000	355000	313000	200000	1.23569	3.39062	1.76155	up
pmb0661	Chrysoeriol C-hexosyl-O-rhamnoside	Flavone C-glycosides	104000	77500	92100	189000	227000	167000	1.24	2.13085	1.09143	up
pmb0681	Apigenin 8-C-pentoside	Flavone C-glycosides	38300	31800	24900	175000	175000	112000	1.26781	4.86316	2.28189	up
pmb0684	C-hexosyl-luteolin O-sinapic acid	Flavone C-glycosides	16600	66100	25200	225000	167000	118000	1.15512	4.7266	2.2408	up
pmb0701	Chrysoeriol 8-C-hexoside	Flavone C-glycosides	339000	369000	343000	151000	207000	131000	1.23265	0.465271	-1.10386	down
pmb0711	Quercetin 7-O-rutinoside	Flavonol	4700000	5510000	6020000	284000	321000	139000	1.28795	0.045841	-4.44722	down
pmb0713	Tricin 7-O-hexosyl-O-hexoside	Flavone	243000	274000	173000	783000	667000	309000	1.05728	2.54928	1.35009	up
pmb0725	Tricin 7-O-feruloylhexoside	Flavone	27700	47000	21700	259000	211000	118000	1.22859	6.09959	2.60871	up
pmb0733	Tricin 5-O-rutinoside	Flavone	415000	462000	450000	9	9	9	1.30626	2.03466e-05	-15.5848	down
pmb0738	Tricin O-sinapoylhexoside	Flavone	20500	52000	23700	241000	184000	91400	1.17676	5.36798	2.42438	up
pmb0774	N-hydroxy tryptamine	Tryptamine derivatives	3290000	4340000	2050000	9	9	9	1.30535	2.78926e-06	-18.4517	down
pmb0776	N-Feruloyl tryptamine	Tryptamine derivatives	170000	230000	209000	92100	25800	34100	1.16183	0.249589	-2.00237	down
pmb0790	Pyridoxine di-O-hexoside	Vitamins	317000	319000	352000	94900	108000	75100	1.28761	0.281377	-1.82943	down
pmb0800	Niacinamide	Vitamins	2730000	3010000	2810000	1790000	1240000	1110000	1.21595	0.484211	-1.04629	down
pmb0808	6,7-dihydroxycoumarin 6-O-quinic acid	Coumarins	115000	137000	118000	26300	9	9	1.03422	0.0711297	-3.8134	down
pmb0835	Gallocatechin-gallocatechin	Catechin derivatives	1240000	1210000	1110000	11000000	11600000	3770000	1.21585	7.4073	2.88895	up
pmb0837	Procyanidin A3	Proanthocyanidins	6670000	8090000	7400000	9	9	9	1.30622	1.21841e-06	-19.6466	down
pmb0848	LysoPC 16:1 (2n isomer)	Lipids_Glycerophospholipids	12300000	37800000	18500000	69800000	43800000	46000000	1.03597	2.32653	1.21818	up
pmb0877	LysoPE 18:1	Lipids_Glycerophospholipids	3250000	5820000	4780000	12200000	6590000	8920000	1.0638	2.00072	1.00052	up
pmb0885	4-oxo-9Z,11Z,13E,15E-octadecatetraenoic acid	Lipids_Fatty acids	9	9	3030	7890	6120	7590	1.00808	7.08661	2.8251	up
pmb0952	Thiamine	Vitamins	36100	23700	19200	102000	1240000	1690000	1.1341	38.3797	5.26227	up
pmb1178	O-Feruloyl 2-hydroxylcoumarin	Coumarins	9	9	9	2540000	1890000	1250000	1.30542	210370	17.6826	up
pmb1318	8-Methyl-2-oxo-4-phenyl-2H-chromen-7-yl 4-(hexyloxy)benzoate	Benzoic acid derivatives	1070000	1050000	1040000	110000	91600	94400	1.30491	0.0936709	-3.41626	down
pmb1605	MAG (18:3) isomer3	Lipids_Glycerolipids	367000	536000	511000	155000	189000	199000	1.25064	0.384017	-1.38076	down
pmb1626	MGMG (18:2) isomer1	Lipids_Glycerolipids	1240000	1560000	1140000	552000	568000	551000	1.27394	0.424112	-1.23748	down
pmb2251	DGMG (18:1)	Lipids_Glycerolipids	3100000	7460000	4260000	1900000	1020000	1150000	1.16418	0.274629	-1.86444	down
pmb2383	MGMG (18:2) isomer2	Lipids_Glycerolipids	203000	407000	224000	103000	53700	48400	1.18852	0.245923	-2.02372	down
pmb2556	Syringaldehyde O-glucoside	Others	7390	6750	4760	18200	14100	12800	1.21738	2.38624	1.25474	up
pmb2601	7-hydroxycoumarin-beta-rhamnoside	Coumarins	22700	24500	26000	9	9	9	1.30625	0.000368852	-11.4047	down
pmb2620	3,4-Dimethoxycinnamic acid	Hydroxycinnamoyl derivatives	194000	213000	225000	573000	422000	522000	1.27281	2.40032	1.26322	up
pmb2657	Argininosuccinate	Organic acids	14000	23800	18000	4880	13300	8130	1.01369	0.471505	-1.08465	down
pmb2795	4-Methoxycinnamic acid	Hydroxycinnamoyl derivatives	352000	459000	446000	2780000	1540000	2520000	1.27034	5.44153	2.44401	up
pmb2826	Citramalate	Organic acids	251000	210000	216000	123000	97100	92300	1.26295	0.461448	-1.11576	down
pmb2831	Protocatechuic acid O-glucoside	Catechin derivatives	793000	656000	835000	291000	222000	334000	1.25789	0.370841	-1.43113	down
pmb2835	Syringaldehyde	Hydroxycinnamoyl derivatives	10900	13300	9950	33800	35000	32400	1.29032	2.9634	1.56725	up
pmb2857	L-Glutamic acid O-glucoside	Amino acid derivatives	200000	191000	229000	685000	616000	880000	1.28347	3.51774	1.81465	up
pmb2858	Maltotetraose	Carbohydrates	92700	119000	200000	37400	69800	60000	1.08653	0.406121	-1.30002	down
pmb2871	2,5-dihydroxy benzoic acid O-hexside	Benzoic acid derivatives	6220000	5110000	5960000	2010000	2060000	1990000	1.29833	0.350492	-1.51255	down
pmb2928	Gallic acid O-Hexoside	Benzoic acid derivatives	72500	88200	74000	49900	28800	24900	1.16329	0.441415	-1.17979	down
pmb2933	Caftaric acid	Hydroxycinnamoyl derivatives	114000	94800	104000	37600	41300	48300	1.28072	0.40665	-1.29814	down
pmb2938	4-O-Caffeoyl quinic acid (criptochlorogenic acid)	Quinate and its derivatives	19300	17100	13100	83100	73500	45400	1.24585	4.08081	2.02885	up
pmb2954	Luteolin O-hexosyl-O-hexosyl-O-hexoside	Flavone	237000	208000	217000	9	9	9	1.3063	4.07855e-05	-14.5816	down
pmb2957	Cyanidin O-syringic acid	Anthocyanins	296000	377000	301000	3490000	2500000	2560000	1.29675	8.77823	3.13393	up
pmb2959	Cyanidin O-acetylhexoside	Anthocyanins	9	9	9	1850000	1210000	1300000	1.30594	161481	17.301	up
pmb2965	Cyanidin O-diacetyl-hexoside-O-glyceric acid	Anthocyanins	9	9	9	82300	58200	58900	1.3058	7385.19	12.8504	up
pmb2968	Chrysoeriol C-hexosyl-O-hexoside	Flavone C-glycosides	11600	12700	10600	4700	7530	5110	1.1997	0.496848	-1.00912	down
pmb2978	Apigenin O-hexosyl-O-pentoside	Flavone	91700	78500	81800	40300	29600	52300	1.18737	0.484921	-1.04418	down
pmb2991	Apigenin O-hexosyl-O-rutinoside	Flavone	14600	13700	5690	58000	77600	71000	1.23941	6.07826	2.60366	up
pmb3012	Chrysoeriol 7-O-hexoside	Flavone	468000	401000	495000	962000	1090000	1120000	1.28387	2.32551	1.21755	up
pmb3013	Isorhamnetin O-acetyl-hexoside	Flavonol	16800	17300	13500	9	9	9	1.30593	0.000567227	-10.7838	down
pmb3019	Chrysoeriol O-homovanillic acid	Flavone	3500	3550	2480	3990	9680	9380	1.04152	2.41868	1.27422	up
pmb3023	Eriodictyol C-hexoside	Flavone C-glycosides	2200000	2010000	2130000	642000	541000	644000	1.29973	0.28817	-1.79501	down
pmb3031	Tricin O-glycerol	Flavone	2150	3530	2560	8340	8580	4090	1.10728	2.54976	1.35036	up
pmb3044	Tricin di-O-hexoside	Flavone	71900	66400	56500	25800	15300	21800	1.25268	0.322895	-1.63086	down
pmb3046	Tricin 7-O-hexoside	Flavone	29700	27900	33200	227000	210000	158000	1.29465	6.55286	2.71213	up
pmb3055	p-Coumaroyl quinic acid O-glucuronic acid	Quinate and its derivatives	12300	9770	12000	6460	4830	4780	1.24439	0.471676	-1.08413	down
pmb3056	Homovanilloyl quinic acid	Quinate and its derivatives	3980	4680	8360	9620	13400	16900	1.10387	2.34548	1.22988	up
pmb3061	5-O-p-coumaroyl quinic acid O-hexoside	Quinate and its derivatives	3080	4810	5160	33700	24900	34000	1.28283	7.09579	2.82696	up
pmb3068	1-O-p-Coumaroyl quinic acid	Quinate and its derivatives	21200	20000	20900	338000	326000	339000	1.30609	16.1514	4.01358	up
pmb3074	3-O-p-Coumaroyl quinic acid	Quinate and its derivatives	2000000	1440000	2330000	678000	664000	966000	1.20941	0.4	-1.32193	down
pmb3075	3-O-p-Coumaroyl shikimic acid	Quinate and its derivatives	9	9	9	19600	18000	22300	1.30619	2218.52	11.1154	up
pmb3081	Glucarate O-Phosphoric acid	Carbohydrates	1400000	962000	1530000	503000	556000	463000	1.24303	0.391059	-1.35454	down
pmb3093	6,7-dihydroxycoumarin 7-O-quinic acid	Coumarins	121000	133000	115000	53500	44400	50100	1.29107	0.401084	-1.31802	down
pmb3107	Syringic acid O-glucoside	Benzoic acid derivatives	28200	34800	28600	13300	15200	12700	1.27576	0.449782	-1.1527	down
pmb3114	Epicatechin-epiafzelechin	Catechin derivatives	24300	27400	27300	9	9	9	1.30622	0.000341772	-11.5147	down
pmc0281	Adenosine O-ribose	Nucleotide and its derivates	1950000	2160000	1900000	9970000	8690000	9350000	1.30316	4.66057	2.22051	up
pmd0136	LysoPC 18:0	Lipids_Glycerophospholipids	36300000	42200000	46600000	87300000	77800000	106000000	1.25174	2.16707	1.11574	up
pme0006	L-Proline	Amino acids	11400000	16800000	10800000	37100000	29500000	34600000	1.24602	2.59487	1.37566	up
pme0008	L-Citrulline	Amino acids	2760000	2350000	3330000	1380000	1440000	1150000	1.2441	0.470379	-1.0881	down
pme0009	L-Serine	Amino acids	556000	770000	821000	350000	229000	287000	1.22165	0.403354	-1.30988	down
pme0024	2-Aminoethanesulfonic acid	Organic acids	68300	59800	65000	125000	117000	150000	1.271	2.03004	1.02151	up
pme0031	Thymine	Nucleotide and its derivates	87200	112000	109000	391000	285000	284000	1.27172	3.11486	1.63917	up
pme0062	Cucurbitacin D	Terpenoids	6930	5080	8750	18300	17000	17400	1.23752	2.53854	1.344	up
pme0094	Cyanidin 3-O-glucoside (Kuromanin)	Anthocyanins	9	9	9	546000	391000	405000	1.306	49703.7	15.6011	up
pme0118	Pyrrole-2-carboxylic acid	Amino acid derivatives	15900	21900	15200	87900	82800	116000	1.28623	5.40943	2.43548	up
pme0122	N6-Acetyl-L-lysine	Amino acid derivatives	516000	642000	865000	2130000	862000	1760000	1.0317	2.34899	1.23204	up
pme0163	β-Nicotinamide mononucleotide	Nucleotide and its derivates	2840000	2970000	3270000	945000	1120000	722000	1.27535	0.306938	-1.70398	down
pme0170	Nα-Acetyl-L-arginine	Amino acid derivatives	9	9	9	422000	438000	686000	1.3059	57259.3	15.8052	up
pme0181	1-Methylhistidine	Amino acid derivatives	159000	186000	190000	404000	302000	382000	1.25196	2.03364	1.02407	up
pme0197	Quercetin 3-O-rutinoside (Rutin)	Flavonol	968000	893000	881000	68000	54600	74900	1.30258	0.0720277	-3.7953	down
pme0205	Catechin	Catechin derivatives	3400000	3580000	3220000	9	9	9	1.30626	2.64706e-06	-18.5272	down
pme0226	L-Asparagine	Amino acids	6870000	6050000	6120000	16600000	18400000	16400000	1.29815	2.69958	1.43273	up
pme0252	N-Acetyl-l-leucine	Amino acid derivatives	32400	34500	36500	62600	92600	164000	1.15294	3.08704	1.62622	up
pme0264	Thymidine	Nucleotide and its derivates	1650000	1690000	1610000	1010000	788000	629000	1.22402	0.490303	-1.02825	down
pme0278	2,6-Diaminooimelic acid	Amino acid derivatives	1870000	2490000	2440000	7960000	6260000	8880000	1.27473	3.39706	1.76429	up
pme0285	4-Guanidinobutyric acid	Organic acids	3220000	3130000	3050000	14700000	10900000	10100000	1.28613	3.79787	1.92519	up
pme0299	Cinnamic acid	Hydroxycinnamoyl derivatives	8760	7740	7680	20400	30400	33200	1.26679	3.47395	1.79658	up
pme0309	Methyl gallate	Benzoic acid derivatives	21300	11900	12400	39900	28400	32800	1.1601	2.21711	1.14868	up
pme0330	Naringenin 7-O-neohesperidoside (Naringin)	Flavanone	110000	128000	96200	654000	759000	735000	1.30034	6.42729	2.68421	up
pme0359	Apigenin 5-O-glucoside	Flavone	1210000	1220000	1490000	5600000	4190000	2740000	1.21579	3.19643	1.67646	up
pme0361	Quercetin 3-alpha-L-arabinofuranoside (Avicularin)	Flavonol	31600	42900	42800	9	9	9	1.30586	0.000230179	-12.085	down
pme0363	Chrysoeriol	Flavone	4690000	4650000	3730000	15600000	16800000	16800000	1.29774	3.76435	1.9124	up
pme0398	Chlorogenic acid (3-O-Caffeoylquinic acid)	Quinate and its derivatives	61800000	59300000	51400000	11700000	9160000	11100000	1.29825	0.185275	-2.43226	down
pme0428	3,4,5-Trimethoxycinnamic acid	Hydroxycinnamoyl derivatives	5960	8400	3770	13300	8800	15300	1.04308	2.06288	1.04466	up
pme0432	Procyanidin A2	Proanthocyanidins	219000	284000	276000	72500	45700	28400	1.24304	0.18819	-2.40974	down
pme0434	Procyanidin B2	Proanthocyanidins	11000000	12800000	11400000	9	12900	9	1.20664	0.000366989	-11.412	down
pme0436	Procyanidin B3	Proanthocyanidins	12100000	12900000	14600000	9	9	9	1.30628	6.81818e-07	-20.4841	down
pme0442	Delphinidin	Anthocyanins	344000	335000	380000	9	9	9	1.30631	2.54958e-05	-15.2594	down
pme0450	L-Epicatechin	Catechin derivatives	104000000	107000000	100000000	515000	337000	165000	1.29833	0.0032701	-8.25645	down
pme0496	Nicotinic acid	Nicotinic acid derivatives	772000	755000	722000	1770000	1410000	1810000	1.27939	2.21876	1.14976	up
pme0500	D(+)-Melezitose	Carbohydrates	287000	249000	273000	89600	123000	118000	1.27049	0.408653	-1.29105	down
pme0513	Xylitol	Alcohols and polyols	169000	183000	235000	640000	348000	385000	1.15827	2.33901	1.2259	up
pme0543	Indole-5-carboxylic acid	Indole derivatives	417000	380000	465000	1940000	1970000	2340000	1.29912	4.95246	2.30814	up
pme1055	L-Kynurenine	Amino acid derivatives	18100	17100	16600	75200	64500	67500	1.30247	4	2	up
pme1086	Glutathione reduced form	Amino acid derivatives	3000000	2180000	2180000	133000	298000	217000	1.27868	0.0880435	-3.50564	down
pme1283	S-(5'-Adenosy)-L-homocysteine	Amino acid derivatives	460000	372000	388000	1260000	1030000	807000	1.24477	2.53852	1.34399	up
pme1292	Homogentisic acid	Organic acids	3120000	2760000	2630000	755000	760000	768000	1.30239	0.268273	-1.89823	down
pme1310	N'-Formylkynurenine	Amino acid derivatives	11000	6860	8270	32300	25900	28900	1.26671	3.33333	1.73697	up
pme1368	L-Pipecolic acid	Amino acid derivatives	78800	84000	112000	199000	139000	248000	1.14955	2.13246	1.09252	up
pme1398	Delphinidin 3-O-glucoside (Mirtillin)	Anthocyanins	1230000	1890000	1080000	7630000	6400000	2650000	1.13898	3.97143	1.98966	up
pme1417	L-Tryptamine	Tryptamine derivatives	2210000	2420000	2230000	400000	233000	246000	1.28874	0.128134	-2.96427	down
pme1424	Coniferylaldehyde	Hydroxycinnamoyl derivatives	19900	19000	15100	52300	40800	37500	1.25145	2.41852	1.27412	up
pme1434	Syringin	Hydroxycinnamoyl derivatives	103000	108000	101000	465000	307000	364000	1.28297	3.64103	1.86434	up
pme1478	Myricetin	Flavonol	64900	97200	65600	351000	367000	118000	1.0911	3.6715	1.87637	up
pme1496	Formononetin (4'-O-methyldaidzein)	Isoflavone	7740	24900	3810	67400	63200	41800	1.11269	4.72977	2.24177	up
pme1502	Kumatakenin	Flavonol	1100000	2290000	1130000	29600000	31600000	18800000	1.28158	17.6991	4.14561	up
pme1521	Dihydroquercetin (Taxifolin)	Flavonol	19400000	22500000	24400000	52600	48700	35300	1.30516	0.00206033	-8.92291	down
pme1537	(+)-Gallocatechin (GC)	Catechin derivatives	158000	191000	188000	9	9	9	1.30617	5.02793e-05	-14.2797	down
pme1539	Isorhamnetin 3-O-neohesperidoside	Flavonol	172000	147000	182000	8800	7950	9350	1.3046	0.0520958	-4.26269	down
pme1541	Acacetin	Flavone	212000	274000	135000	2930000	3430000	2810000	1.29102	14.7665	3.88426	up
pme1580	Eriodictyol	Flavanone	8690000	17100000	5590000	2610000	3150000	2020000	1.14915	0.247929	-2.012	down
pme1598	Hesperetin 5-O-glucoside	Flavanone	5990000	5680000	6520000	273000	181000	210000	1.30279	0.0365036	-4.77582	down
pme1600	7-O-Methyleriodictyol	Flavanone	178000	472000	242000	10800000	7110000	3410000	1.25767	23.9013	4.57902	up
pme1611	Isohemiphloin	Flavone	624000	432000	682000	112000	103000	134000	1.28147	0.200806	-2.31613	down
pme1709	Nicotinic Acid Methyl Ester (Methyl Nicotinate)	Vitamins	525000	537000	501000	1460000	1400000	1250000	1.29895	2.62956	1.39482	up
pme1777	Cyanidin 3,5-O-diglucoside (Cyanin)	Anthocyanins	121000	408000	538000	9	9	9	1.30116	2.53046e-05	-15.2702	down
pme1806	Chlorogenic acid methyl ester	Quinate and its derivatives	163000	120000	123000	45200	33200	35100	1.27805	0.279557	-1.83879	down
pme1814	2,5-dihydroxybenzoic acid (Gentisic acid)	Benzoic acid derivatives	7800000	6830000	7130000	1440000	1470000	2030000	1.28991	0.227022	-2.1391	down
pme1816	Neochlorogenic acid (5-O-Caffeoylquinic acid)	Quinate and its derivatives	11400000	12100000	11900000	4890000	3380000	4080000	1.28025	0.34887	-1.51924	down
pme1824	Protocatechuic acid	Catechin derivatives	42900000	37900000	40200000	7590000	7890000	10600000	1.29256	0.215537	-2.21399	down
pme1949	Riboflavin	Vitamins	130000	131000	127000	314000	244000	264000	1.28028	2.11856	1.08308	up
pme2024	serotonin	Tryptamine derivatives	4680000	5790000	2970000	9	9	9	1.30556	2.00893e-06	-18.9251	down
pme2033	L(-)-Malic acid	Organic acids	45900000	46700000	46900000	142000000	130000000	130000000	1.30403	2.88172	1.52693	up
pme2036	Quinic acid	Quinate and its derivatives	1140000	919000	940000	470000	494000	425000	1.27872	0.463154	-1.11043	down
pme2046	3-N-Methyl-L-histidine	Amino acid derivatives	709000	647000	523000	208000	309000	207000	1.23936	0.385311	-1.3759	down
pme2050	Citric acid	Organic acids	22600000	19200000	21900000	11000000	9950000	10300000	1.29024	0.490581	-1.02744	down
pme2122	Histamine	Amino acid derivatives	852000	698000	801000	1970000	1900000	1400000	1.2463	2.2416	1.16453	up
pme2256	D-Arabitol	Alcohols and polyols	321000	331000	437000	1180000	574000	722000	1.12015	2.27365	1.18501	up
pme2319	Hesperetin	Flavanone	64100	42500	69400	98400	119000	137000	1.16508	2.01364	1.0098	up
pme2362	Mandelic acid	Organic acids	64100	74700	76500	302000	308000	286000	1.30177	4.16163	2.05715	up
pme2478	Protocatechuic aldehyde	Catechin derivatives	1520000	1210000	1240000	289000	313000	391000	1.28824	0.250126	-1.99927	down
pme2491	Kaempferol 3,7-dirhamnoside (Kaempferitrin)	Flavonol	28900	25000	36300	13000	15600	13100	1.24417	0.462306	-1.11308	down
pme2529	1,5-Anhydro-D-glucitol	Alcohols and polyols	45900	27100	42300	188000	128000	219000	1.25115	4.64007	2.21415	up
pme2559	N-Acetylaspartate	Amino acid derivatives	57600	36800	55400	299000	286000	202000	1.27202	5.25367	2.39333	up
pme2563	γ-Glu-Cys	Amino acid derivatives	79800	58600	73000	13700	24300	27000	1.22104	0.307474	-1.70146	down
pme2566	(5-L-Glutamyl)-L-amino acid	Amino acid derivatives	69700	69900	83700	243000	211000	243000	1.29434	3.12136	1.64218	up
pme2596	4-Pyridoxic acid	Pyridine derivatives	2390000	2560000	2410000	12000000	9980000	11300000	1.30254	4.52174	2.17688	up
pme2598	3,4-Dihydroxybenzeneacetic acid	Organic acids	3210000	2970000	2870000	784000	801000	882000	1.30238	0.272597	-1.87516	down
pme2603	3-Hydroxyanthranilic acid	Organic acids	106000	93900	95700	21100	14600	28800	1.26476	0.2182	-2.19628	down
pme2607	5-Hydroxyindole-3-acetic acid	Indole derivatives	179000	221000	185000	953000	1510000	1450000	1.28849	6.68889	2.74177	up
pme2670	4-Hydroxybenzaldehyde	Benzoic acid derivatives	4530000	3700000	4360000	743000	557000	1550000	1.21443	0.22637	-2.14324	down
pme2706	2,3-Dihydroxybenzoic acid	Organic acids	44500000	38800000	41200000	8350000	8190000	11400000	1.29114	0.224418	-2.15574	down
pme2773	L-Cystathionine	Amino acid derivatives	42100	63500	51900	158000	105000	195000	1.20899	2.90794	1.54	up
pme2786	N-Acetyl-5-hydroxytryptamine	Tryptamine derivatives	441000	519000	636000	47900	9	9	1.06943	0.0300238	-5.05775	down
pme2890	L-Homocystine	Amino acids	74100	116000	71300	47800	31100	41900	1.15273	0.462127	-1.11364	down
pme2895	Dihydromyricetin	Flavonol	177000	243000	213000	9	9	9	1.30601	4.2654e-05	-14.517	down
pme2901	1-O-Caffeoyl quinic acid	Quinate and its derivatives	13900000	14600000	12700000	5280000	3740000	4550000	1.28244	0.329369	-1.60222	down
pme2954	Quercetin	Flavonol	40900	101000	73600	9	9	9	1.30376	0.00012529	-12.9624	down
pme2963	Aromadedrin (Dihydrokaempferol)	Flavonol	683000	597000	720000	60900	72000	56000	1.30276	0.09445	-3.40431	down
pme2984	Isosakuranetin-7-neohesperidoside (Poncirin)	Flavanone	36300	58800	40200	180000	179000	79300	1.14561	3.23947	1.69576	up
pme2993	Scopoletin (7-Hydroxy-5-methoxycoumarin)	Coumarins	262000	273000	221000	112000	134000	94500	1.25189	0.450397	-1.15073	down
pme3005	N,N-Dimethylformamide	Organic acids	5740000	3810000	3240000	1940000	1450000	1150000	1.19587	0.354965	-1.49425	down
pme3011	γ-aminobutyric acid	Organic acids	2230000	2360000	2980000	7280000	3720000	5060000	1.12355	2.12153	1.08511	up
pme3104	1-Methyladenine	Nucleotide and its derivates	714000	787000	661000	214000	151000	87100	1.24244	0.209112	-2.25765	down
pme3129	Quercetin 4'-O-glucoside (Spiraeoside)	Flavonol	4620000	4260000	5210000	358000	240000	282000	1.30101	0.0624556	-4.00102	down
pme3163	D-Sedoheptuiose 7-phosphate	Carbohydrates	850000	752000	1140000	391000	434000	421000	1.24232	0.454413	-1.13792	down
pme3208	Glycitin	Isoflavone	27900	31100	21100	100000	63200	114000	1.23525	3.46067	1.79105	up
pme3210	Genistein 7-O-Glucoside (Genistin)	Isoflavone	1240000	1210000	1330000	4770000	4150000	2600000	1.23403	3.04762	1.60768	up
pme3211	Quercetin 3-O-glucoside (Isotrifoliin)	Flavonol	5390000	4890000	5310000	315000	265000	237000	1.30434	0.0524054	-4.25414	down
pme3292	Prunetin	Isoflavone	209000	309000	151000	3160000	3600000	2950000	1.29099	14.5142	3.85939	up
pme3349	8-Hydroxy-2-deoxyguanosine	Nucleotide and its derivates	35000	31100	36000	9190	13000	15300	1.24817	0.367189	-1.44541	down
pme3351	Allysine(6-Oxo DL-Norleucine)	Amino acid derivatives	35100	16500	30700	101000	71300	96600	1.2022	3.26731	1.70811	up
pme3369	Rhamnetin (7-O-methxyl quercetin)	Flavonol	3500	8200	3490	45500	42600	31400	1.25681	7.86702	2.97582	up
pme3382	N-Acetylthreonine	Amino acid derivatives	203000	182000	181000	797000	700000	790000	1.30205	4.04064	2.01458	up
pme3393	Fustin	Flavonol	27600	57300	16700	83600	85000	106000	1.09625	2.70276	1.43443	up
pme3400	Sissotrin	Isoflavone	9	74700	9	409000	438000	435000	1.03618	17.1578	4.1008	up
pme3419	Esculetin (6,7-dihydroxycoumarin)	Coumarins	237000	186000	269000	90600	82300	77200	1.27369	0.361416	-1.46827	down
pme3428	Esculin (6,7-Dihydroxycoumarin-6-glucoside)	Coumarins	367000	238000	321000	1000000	1070000	1190000	1.27598	3.52052	1.81579	up
pme3443	Sinapinaldehyde	Hydroxycinnamoyl derivatives	47200	39900	42500	626000	626000	425000	1.2981	12.9398	3.69375	up
pme3478	Pantetheine	Vitamins	274000	225000	225000	58800	112000	65600	1.22848	0.326519	-1.61476	down
pme3514	Morin	Flavonol	250000	411000	315000	39900	38200	32600	1.29244	0.113422	-3.14023	down
pme3705	D-glucoronic acid	Carbohydrates	2170000	3120000	2140000	364000	359000	377000	1.29435	0.148048	-2.75586	down
pme3719	D-Xylonic acid	Organic acids	3480000	3560000	3490000	8600000	8140000	9060000	1.30335	2.45014	1.29287	up
pme3882	2'-Deoxyuridine	Nucleotide and its derivates	9	9	9	15600	11900	9740	1.30521	1379.26	10.4297	up
