# Supplementary material for: Metabolite Profiling of Sorghum Seeds of Different Colors from Different Sweet Sorghum Cultivars Using a Widely Targeted Metabolomics Approach
Source: Int J Genomics. 2020 Mar 4;2020:6247429. doi: 10.1155/2020/6247429 (PMC7073482; doi:10.1155/2020/6247429)
Supplement: Supplementary 6 — Table S4: the metabolite and its corresponding content in Z6, HC4, and Z27. [file 6247429.f6.xlsx]

## Sheet: Sheet1
					Table 5s. The metabolite and its corresponding content in Z6,HC4 and Z27
Index	Q1 (Da)	Q3 (Da)	Rt (min)	Molecular Weight (Da)	Ionization model	KEGG ID	Compounds	Class	mix01	mix02	mix03	HC4-1	HC4-2	HC4-3	Z27-1	Z27-2	Z27-3	Z6-1	Z6-2	Z6-3
pma0104	369.1	207.5	3.72	368.1	[M+H]+	-	N-sinapoyl hydroxycoumarin	Coumarins	136000	120000	105000	9	9	9	270000	236000	195000	9	9	9
pma0110	399	207.5	3.04	398	[M+H]+	-	O-Sinapoyl quinic acid	Quinate and its derivatives	59800	77700	95100	193000	232000	117000	66000	61500	58100	26700	33100	45900
pma0134	121	77.1	1.14	120	[M+H]+	-	D(-)-Threose	Carbohydrates	176000	286000	237000	155000	166000	127000	236000	423000	3640000	187000	217000	190000
pma0149	341.1	179.4	2.47	340.1	[M+H]+	C02887	Sinapoyl malate	Organic acids	2130000	3530000	3660000	7060000	7530000	4200000	1350000	1390000	1400000	2210000	2090000	2170000
pma0170	498.3	323	3.53	497.3	[M+H]+	-	"N', N''-Diferuloylspermidine"	Phenolamides	7660000	19700000	18400000	14500000	12000000	7460000	25600000	29000000	33200000	15900000	15900000	11600000
pma0214	479	317.3	3.84	478	[M+H]+	-	methylQuercetin O-hexoside	Flavonol	2860000	7800000	8740000	17600000	14300000	3310000	2900000	5490000	3360000	433000	698000	5770000
pma0249	479.1	302.8	3.54	478.1	[M+H]+	-	Selgin 5-O-hexoside	Flavone	175000	426000	390000	280000	536000	323000	375000	430000	523000	118000	149000	9
pma0253	477.1	315.5	5.27	476.1	[M+H]+	-	O-methylChrysoeriol 5-O-hexoside	Flavone	1670000	2350000	2460000	5850000	5950000	2970000	602000	833000	669000	137000	543000	367000
pma0461	277.2	157.4	8.47	276.2	[M+H]+	-	"14,15-Dehydrocrepenynic acid"	Lipids_Fatty acids	6240000	7440000	7000000	5950000	4710000	5300000	5170000	5870000	6330000	5840000	7680000	7020000
pma0680	484.2	484.1	3.26	483.2	[M+H]+	-	"N', N''-Feruloyl,caffeoylspermidine"	Phenolamides	8760000	20100000	23000000	13500000	14400000	8360000	30100000	40900000	35500000	18200000	16100000	14600000
pma0692	438.2	147.5	3.37	437.2	[M+H]+	-	"N', N''-di-p-coumaroylspermidine"	Phenolamides	135000	186000	181000	120000	133000	107000	145000	332000	224000	129000	319000	130000
pma0724	435.1	339.7	3.74	434.1	[M+H]+	-	Naringenin C-hexoside	Flavone C-glycosides	528000	582000	548000	9	9	9	1590000	1230000	1330000	61800	53600	100000
pma0760	565	317.8	4.32	564	[M+H]+	-	Selgin O-malonylhexoside	Flavone	496000	891000	1000000	1890000	1640000	396000	195000	731000	268000	50400	76000	1020000
pma0791	521	317.6	4.46	520	[M+H]+	-	Naringenin O-malonylhexoside	Flavanone	374000	873000	909000	1140000	1240000	721000	544000	623000	618000	362000	327000	310000
pma0795	551	347.4	4.52	550	[M+H]+	-	Tricetin O-malonylhexoside	Flavone	152000	308000	314000	381000	539000	244000	171000	170000	223000	79200	160000	147000
pma0825	503	255.6	5.23	502	[M+H]+	-	Chrysin O-malonylhexoside	Flavone	18200	31900	37800	55800	48500	55300	11100	14200	14100	3500	7150	6730
pma0948	138.1	77.2	1.18	137.1	[M+H]+	-	Hydroxyphenethylamine	Others	155000	190000	188000	200000	161000	144000	86200	134000	120000	283000	267000	269000
pma1087	565.2	499.3	3.67	564.2	[M+H]+	-	C-pentosyl-C-hexosyl-apigenin	Flavone C-glycosides	154000	384000	345000	686000	601000	177000	119000	213000	136000	118000	137000	188000
pma1108	433.1	271.7	3.73	432.1	[M+H]+	-	Apigenin C-glucoside	Flavone C-glycosides	511000	920000	848000	1060000	1040000	720000	641000	614000	674000	369000	597000	788000
pma1116	301.1	259.1	3.98	300.1	[M+H]+	C10098	Kaempferide	Flavonol	2100000	3710000	3710000	3540000	2990000	2220000	6270000	5380000	8740000	394000	580000	479000
pma1590	463.1	301.4	3	463.123	Protonated	-	Peonidin O-hexoside	Anthocyanins	345000	464000	633000	881000	9	732000	603000	429000	584000	9	162000	9
pma1751	286	124.3	2.03	285	[M+H]+	-	Nicotinic acid-hexoside	Nicotinic acid derivatives	347000	805000	787000	1130000	1100000	553000	544000	663000	526000	585000	677000	520000
pma2987	142.1	82.9	0.58	141.1	[M+H]+	C00860	Histidinol	Others	59200000	71700000	92500000	58500000	65500000	76900000	69800000	76000000	87800000	66400000	88200000	73900000
pma3101	256.2	124	0.8	255.2	[M+H]+	C05841	Nicotinate ribonucleoside	Nicotinic acid derivatives	6760000	9920000	8540000	6620000	6860000	6450000	10200000	10700000	11000000	9260000	8020000	9600000
pma3606	295.2	179.5	9.18	294.2	[M+H]+	-	"9-Hydroxy-(10E,12Z,15Z)-octadecatrienoic acid"	Lipids_Fatty acids	14100000	15600000	15400000	9600000	7990000	9500000	13300000	14000000	13800000	15900000	19300000	18800000
pma3649	132.1	86.2	0.99	131.1	[M+H]+	C00430	5-Aminolevulinate	Organic acids	4660000	7480000	7300000	6920000	6080000	7660000	6110000	7020000	5750000	7360000	7590000	7110000
pma3724	369.1	207.5	3.43	368.1	[M+H]+	-	1-O-Feruloyl quinic acid	Quinate and its derivatives	1750000	2830000	2600000	3190000	2320000	1880000	3930000	3400000	3960000	1060000	1520000	1300000
pma6199	417.2	255.8	4.96	416.2	[M+H]+	-	Chrysin O-hexoside	Flavone	113000	132000	116000	267000	9	283000	45200	51600	35900	50600	86100	53200
pma6218	419.1	383.9	3.81	418.1	[M+H]+	-	O-methylnaringenin C-pentoside	Flavone C-glycosides	417000	521000	606000	650000	596000	839000	445000	487000	509000	37200	9	9
pma6262	349.2	147	2.46	348.2	[M+H]+	-	N'-p-coumaroylspermine	Phenolamides	8700	13200	13500	15300	9	14700	8240	16700	11400	10800	10200	14100
pma6270	258.2	125.2	0.8	258.2	Protonated	C00670	sn-Glycero-3-phosphocholine	Cholines	4360000	10700000	10600000	11400000	13100000	8660000	14400000	14300000	13200000	5750000	6140000	5460000
pma6281	145.1	74	0.73	146.1	[M-H]-	-	Methylglutaric acid	Organic acids	6770	5990	3840	7290	10100	7300	1910	2450	7180	5450	4750	5120
pma6298	96	80.2	1.07	95	[M+H]+	-	3-Hydroxypyridine	Others	26800	42700	39700	86200	58900	87000	48600	57100	37800	9	33500	25600
pma6389	345.2	177.5	6.15	344.2	[M+H]+	C04444	Ayanin	Flavonol	42100	38200	36700	23700	32900	24100	53600	57800	51400	8820	11700	11000
pma6460	337	275.8	3.24	338	[M-H]-	-	5-O-p-Coumaroylquinic acid	Quinate and its derivatives	71100	67800	79200	84800	76100	98300	128000	91800	128000	21200	26200	22500
pma6496	449.1	300	3.47	448.1	[M+H]+	-	Luteolin 6-C-glucoside	Flavone C-glycosides	784000	1510000	1500000	1200000	967000	595000	1410000	1690000	1480000	1100000	1650000	2410000
pma6518	771.2	177.5	4.26	770.2	[M+H]+	-	C-pentosyl-chrysoeriol 7-O-feruloylhexoside	Flavone C-glycosides	31500	46800	41200	103000	57600	50400	11600	9	12700	9	22800	9
pma6558	313.1	298.3	7.23	314.1	[M-H]-	-	Velutin	Flavone	2150000	2000000	1940000	3490000	3950000	2180000	192000	295000	156000	283000	827000	2740000
pma6561	341	179.2	3.01	342	[M-H]-	-	Caffeic acid O-glucoside	Hydroxycinnamoyl derivatives	1780000	1640000	1760000	1610000	1820000	2010000	1270000	1280000	1080000	2890000	2910000	3210000
pma6586	567.3	406	3.99	566.3	[M+H]+	-	Tricin O-glycerylhexoside	Flavone	31500	42400	50700	9	9	9	100000	71300	91600	15300	25500	9
pma6599	207.1	147.4	3.21	206.1	[M+H]+	-	6-Hydroxymethylherniarin	Hydroxycinnamoyl derivatives	155000	228000	246000	258000	218000	198000	228000	223000	218000	277000	259000	255000
pma6638	477.2	328	5.27	476.2	[M+H]+	-	O-methylChrysoeriol 7-O-hexoside	Flavone	1620000	2360000	2550000	6110000	6010000	3050000	581000	734000	593000	124000	488000	398000
pma6639	479.2	318	4.11	478.2	[M+H]+	-	Isorhamnetin O-hexoside	Flavonol	4930000	9400000	9550000	20500000	14300000	5640000	3680000	7250000	3290000	355000	818000	9780000
pma6647	625.2	463.6	3.49	624.2	[M+H]+	-	C-hexosyl-chrysoeriol O-hexoside	Flavone C-glycosides	143000	229000	269000	121000	133000	129000	167000	144000	109000	362000	467000	530000
pmb0064	374.1	198.6	2.18	373.1	[M+H]+	C04831	DIMBOA glucoside	Others	701000	1710000	1640000	1620000	1810000	941000	1290000	1440000	1550000	1450000	1620000	1440000
pmb0069	122	105.3	2.31	121	[M+H]+	C09815	Benzamide	Others	142000	241000	242000	296000	54600	65700	70900	108000	55200	437000	491000	527000
pmb0130	203	133.3	4.66	202	[M+H]+	-	N-Acetyl tryptamine	Phenolamides	448000	481000	502000	448000	177000	257000	397000	369000	587000	842000	536000	617000
pmb0142	165.1	95.5	5.99	164.1	[M+H]+	C10945	Caffeic aldehyde	Hydroxycinnamoyl derivatives	43800	27800	38800	36600	31400	54600	28100	28400	25500	35400	28700	29300
pmb0149	351	259.8	6.62	350	[M+H]+	-	MAG (18:4) isomer1	Lipids_Glycerolipids	18500	22600	19300	3810	9	5070	22200	50100	46300	9	8140	10100
pmb0159	696.4	696.2	7.53	695.4	[M+H]+	-	DGMG (18:2) isomer2	Lipids_Glycerolipids	477000	404000	328000	289000	138000	173000	494000	1090000	614000	155000	238000	258000
pmb0160	353.3	261.8	7.53	352.3	[M+H]+	-	MAG (18:3) isomer5	Lipids_Glycerolipids	5680000	4600000	4290000	3320000	1610000	2130000	5020000	13100000	7650000	1960000	2570000	2730000
pmb0161	696.4	337.8	8.05	695.4	[M+H]+	-	DGMG (18:2) isomer1	Lipids_Glycerolipids	5220000	4380000	3730000	3030000	1460000	1710000	5880000	12500000	6530000	2570000	3340000	3500000
pmb0163	696.4	696.3	8.24	695.4	[M+H]+	-	DGMG (18:2) isomer3	Lipids_Glycerolipids	1850000	1440000	1210000	570000	708000	775000	1250000	724000	876000	2620000	3040000	3150000
pmb0164	355.1	263.8	8.38	354.1	[M+H]+	-	MAG (18:2) isomer1	Lipids_Glycerolipids	185000	155000	152000	49500	69500	93200	96800	65000	93200	265000	286000	275000
pmb0197	298.1	166.5	1.14	297.1	[M+H]+	-	N2-methylguanosine	Nucleotide and its derivates	287000	574000	606000	439000	313000	470000	470000	523000	464000	937000	986000	916000
pmb0277	331.1	315.8	5.69	330.1	[M+H]+	-	Tricin	Flavone	2360000	2280000	2310000	419000	947000	1100000	3490000	4750000	2890000	502000	1930000	3040000
pmb0292	387.1	331.8	7.59	386.1	[M+H]+	C00187	Cholesterol	Others	1750000	1420000	1310000	1490000	972000	1490000	603000	684000	1280000	1650000	1290000	2300000
pmb0296	357.2	339.9	8.8	356.2	[M+H]+	-	MAG (18:1) isomer2	Lipids_Glycerolipids	5160000	3780000	3780000	2480000	1170000	1320000	1560000	3580000	1860000	1140000	1680000	1660000
pmb0322	653.3	345.9	4.7	652.3	[M+H]+	-	"3’,4’,5’-Tricetin O-rutinoside"	Flavone	1160000	1090000	1150000	1800000	1440000	1400000	437000	465000	528000	687000	805000	1450000
pmb0323	251.1	233.5	1.89	250.1	[M+H]+	C03002	N-Caffeoyl putrescine	Phenolamides	32100	67000	59900	42900	37000	41800	78000	9	71500	78600	93400	67300
pmb0325	321.1	177.5	2.82	320.1	[M+H]+	-	N-Feruloyl spermidine	Phenolamides	33900	75100	73600	9	9	9	73200	78000	63100	48600	9	61900
pmb0374	136.1	119.3	1.89	135.1	[M+H]+	-	Aminopurine	Others	19400000	25500000	26100000	22900000	23300000	20400000	21800000	23200000	23500000	28100000	29000000	28500000
pmb0382	339.1	177.5	3.84	338.1	[M+H]+	-	O-Feruloyl 4-hydroxylcoumarin	Coumarins	1090000	1580000	1720000	860000	853000	548000	2970000	2350000	2940000	1050000	808000	1040000
pmb0423	195.1	177.5	3.19	194.1	[M+H]+	-	Hydroxy-methoxycinnamate	Hydroxycinnamoyl derivatives	2340000	3010000	2930000	5080000	3680000	3860000	3580000	3890000	3090000	348000	413000	363000
pmb0449	162.1	98.3	0.8	161.1	[M+H]+	C00956	2-Aminoadipic acid (L-Homoglutamic acid)	Amino acids	2710000	3430000	3170000	9150000	3220000	3950000	1650000	1660000	2260000	1570000	2340000	2010000
pmb0464	458.1	116.4	0.79	457.1	[M+H]+	-	Aspartic acid di-O-glucoside	Amino acid derivatives	3040000	4670000	5730000	5440000	4690000	5380000	2540000	3420000	2500000	5500000	6280000	6150000
pmb0468	178	161.5	1.55	177	[M+H]+	C03145	N-formylmethionine	Amino acid derivatives	62700	58900	65900	9	9	9	129000	199000	95800	71400	82700	108000
pmb0484	104.1	60.2	0.74	103.1	[M+H]+	C00114	Choline	Cholines	4530000	9940000	9010000	9150000	11200000	8530000	10700000	9700000	9700000	9710000	9190000	9340000
pmb0496	307.2	177.5	2.71	306.2	[M+H]+	C18325	N-Feruloyl agmatine	Phenolamides	48100	116000	105000	57700	48600	9	98000	49600	88400	300000	224000	246000
pmb0501	131.1	72.1	0.64	130.1	[M+H]+	C00179	Agmatine	Phenolamides	80100	116000	108000	147000	123000	121000	151000	98000	111000	115000	101000	99900
pmb0541	697.1	696.9	2.24	697.1	Protonated	-	Cyanidin 3-O-glucosyl-malonylglucoside	Anthocyanins	54600	109000	117000	342000	248000	129000	9	9	9	9	9	9
pmb0557	621.1	287.4	3.25	621.1	Protonated	-	Cyanidin O-malonyl-malonylhexoside	Anthocyanins	4300000	9060000	8570000	29100000	20900000	9850000	9	9	9	9	9	9
pmb0563	301.1	273.6	3.98	301.1	Protonated	C08726	Peonidin	Anthocyanins	2170000	3710000	3840000	2730000	2560000	1860000	5930000	4140000	7940000	332000	459000	9
pmb0569	509.2	347.6	4.01	508.2	[M+H]+	-	Syringetin 5-O-hexoside	Flavone	131000	254000	299000	9	63400	19200	790000	783000	900000	9	9	71700
pmb0576	519	271.7	4.45	518	[M+H]+	-	Apigenin O-malonylhexoside	Flavone	1540000	3160000	3400000	2860000	2080000	2860000	1790000	6530000	2170000	1880000	1410000	958000
pmb0578	655	287.7	4.59	654	[M+H]+	-	Luteolin O-sinapoylhexoside	Flavone	118000	112000	110000	192000	158000	80700	18500	57000	9	15000	21700	69800
pmb0579	669	301.6	4.82	668	[M+H]+	-	Chrysoeriol O-sinapoylhexoside	Flavone	95700	72600	82800	142000	125000	114000	17600	29700	13000	16600	31200	31600
pmb0580	417.1	255.7	4.95	416.1	[M+H]+	-	Chrysin 5-O-glucoside (Toringin)	Flavone	96700	99100	95100	172000	9	222000	12100	37600	25500	36400	75000	39500
pmb0588	611.1	449.4	3.38	610.1	[M+H]+	-	"Luteolin 3',7-di-O-glucoside"	Flavone	434000	748000	882000	697000	1140000	766000	368000	362000	291000	382000	808000	1860000
pmb0595	479.2	317.8	4	478.2	[M+H]+	-	Isorhamnetin 5-O-hexoside	Flavonol	7870000	16100000	15800000	35400000	29000000	7730000	5480000	9280000	5380000	1130000	1700000	11100000
pmb0600	609.4	301.7	4.03	608.4	[M+H]+	-	Chrysoeriol 7-O-rutinoside	Flavone	4570000	4760000	4270000	5690000	5960000	4800000	4210000	3140000	5770000	1690000	3770000	4590000
pmb0601	595.1	301.8	4.05	594.1	[M+H]+	-	Chrysoeriol O-hexosyl-O-pentoside	Flavone	31500	52100	49900	33800	41500	27300	81600	71800	74500	36400	54300	47500
pmb0602	509.3	283.6	4.1	508.3	[M+H]+	-	Syringetin 7-O-hexoside	Flavone	311000	605000	647000	58300	53400	9	1540000	1810000	1740000	9	9	9
pmb0603	625.1	331.7	4.12	624.1	[M+H]+	-	Chrysoeriol O-hexosyl-O-hexoside	Flavone	71900	63000	67800	58800	91800	104000	31400	27400	34300	27500	64300	55900
pmb0608	549.1	301.7	4.52	548.1	[M+H]+	-	Chrysoeriol O-malonylhexoside	Flavone	1520000	2510000	2810000	3650000	4750000	3180000	971000	1040000	1020000	680000	1070000	1920000
pmb0618	627.1	430	2.76	626.1	[M+H]+	-	8-C-hexosyl-hesperetin O-hexoside	Flavone C-glycosides	526000	988000	1070000	2010000	1460000	601000	996000	1210000	938000	489000	430000	468000
pmb0622	611.2	412.3	2.89	610.2	[M+H]+	-	C-hexosyl-luteolin O-hexoside	Flavone C-glycosides	23100	40700	27200	57100	47800	22900	9	41500	54200	9	9	9
pmb0624	611.1	329	3.05	610.1	[M+H]+	-	6-C-hexosyl-luteolin O-hexoside	Flavone C-glycosides	295000	714000	736000	2580000	2310000	518000	162000	203000	141000	83100	80400	137000
pmb0626	757.1	757	2.94	756.1	[M+H]+	-	6-C-hexosyl-apigenin O-hexosyl-O-hexoside	Flavone C-glycosides	59400	120000	114000	266000	252000	131000	64300	51600	41600	9	9	9
pmb0628	613.1	300.3	3.04	612.1	[M+H]+	-	Eriodictiol C-hexosyl-O-hexoside	Flavone C-glycosides	167000	493000	465000	1100000	1130000	298000	326000	349000	317000	9	9	9
pmb0631	581.1	467.9	3.14	580.1	[M+H]+	-	C-hexosyl-luteolin C-pentoside	Flavone C-glycosides	219000	548000	590000	1100000	1050000	413000	515000	349000	485000	93300	150000	263000
pmb0645	627.1	447.3	3.37	626.1	[M+H]+	-	6-C-hexosyl-hesperetin O-hexoside	Flavone C-glycosides	137000	333000	269000	262000	389000	116000	146000	9	135000	433000	380000	677000
pmb0652	565.1	397.8	3.55	564.1	[M+H]+	-	C-hexosyl-apigenin O-pentoside	Flavone C-glycosides	78800	146000	168000	355000	313000	200000	77100	74900	104000	15500	53000	62300
pmb0661	609.1	463.4	3.78	608.1	[M+H]+	-	Chrysoeriol C-hexosyl-O-rhamnoside	Flavone C-glycosides	134000	105000	181000	189000	227000	167000	104000	77500	92100	71300	106000	105000
pmb0673	403.1	367.7	3.99	402.1	[M+H]+	-	Apigenin 6-C-pentoside	Flavone C-glycosides	34100	30500	38000	44800	28800	33600	9	10200	11400	9	2230	8060
pmb0676	801	801	4.14	800	[M+H]+	-	8-C-hexosyl-chrysoeriol O-feruloylhexoside	Flavone C-glycosides	7980	20000	19800	43600	44500	10200	9	5940	2210	9	9900	9
pmb0678	771.2	753	4.2	770.2	[M+H]+	-	8-C-hexosyl-apigenin O-feruloylhexoside	Flavone C-glycosides	27300	35600	44100	9	64300	9	9	9	14300	9	19100	9
pmb0681	403.1	367.6	4.25	402.1	[M+H]+	-	Apigenin 8-C-pentoside	Flavone C-glycosides	80000	65800	89200	175000	175000	112000	38300	31800	24900	9	11600	9
pmb0684	655.2	655	4.37	654.2	[M+H]+	-	C-hexosyl-luteolin O-sinapic acid	Flavone C-glycosides	112000	113000	116000	225000	167000	118000	16600	66100	25200	16600	21200	76100
pmb0689	463.1	301.8	4.69	462.1	[M+H]+	-	Chrysoeriol C-hexoside	Flavone C-glycosides	47400	65400	56000	129000	85300	73200	22300	37700	9	9	12400	52200
pmb0696	625	397.8	3.41	624	[M+H]+	-	8-C-hexosyl chrysoeriol O-hexoside	Flavone C-glycosides	39200	115000	103000	96500	187000	45200	71000	62800	70300	162000	183000	219000
pmb0701	463.1	367.8	3.85	462.1	[M+H]+	-	Chrysoeriol 8-C-hexoside	Flavone C-glycosides	270000	633000	841000	151000	207000	131000	339000	369000	343000	1100000	1550000	1440000
pmb0706	713.1	713.1	2.93	712.1	[M+H]+	-	Quercetin 5-O-malonylhexosyl-hexoside	Flavonol	54600	132000	123000	330000	278000	114000	79900	68300	9	9	9	9
pmb0711	611.2	303.7	3.64	610.2	[M+H]+	-	Quercetin 7-O-rutinoside	Flavonol	1150000	1970000	2150000	284000	321000	139000	4700000	5510000	6020000	136000	470000	141000
pmb0712	655.2	331.7	3.21	654.2	[M+H]+	-	Tricin 5-O-hexosyl-O-hexoside	Flavone	211000	217000	234000	346000	381000	212000	172000	241000	105000	27300	9	84600
pmb0713	655.2	331.7	3.45	654.2	[M+H]+	-	Tricin 7-O-hexosyl-O-hexoside	Flavone	211000	344000	375000	783000	667000	309000	243000	274000	173000	25300	57100	141000
pmb0720	579.1	331.7	4.5	578.1	[M+H]+	-	Tricin O-malonylhexoside	Flavone	1220000	1650000	1800000	2740000	2340000	1230000	1340000	1700000	1300000	76900	165000	650000
pmb0723	689.2	329.8	4.92	688.2	[M+H]+	-	Tricin 4'-O-(β-guaiacylglyceryl) ether O-hexoside	Flavonolignan	9480	12100	13700	21500	9	9	4630	10800	9	9	15600	19300
pmb0724	477.1	331.8	4.94	476.1	[M+H]+	-	Tricin O-rhamnoside	Flavone	46800	81900	87700	174000	128000	92500	9	38400	17600	9	10900	72500
pmb0725	669.1	669	5.04	668.1	[M+H]+	-	Tricin 7-O-feruloylhexoside	Flavone	114000	101000	126000	259000	211000	118000	27700	47000	21700	9	9	33200
pmb0733	639.1	331.8	4.02	638.1	[M+H]+	-	Tricin 5-O-rutinoside	Flavone	187000	186000	191000	9	9	9	415000	462000	450000	9	52400	117000
pmb0738	699.2	331.6	4.83	698.2	[M+H]+	-	Tricin O-sinapoylhexoside	Flavone	101000	104000	99200	241000	184000	91400	20500	52000	23700	9	9	28900
pmb0749	369.1	177.5	2.25	368.1	[M+H]+	-	O-Feruloyl quinic acid	Quinate and its derivatives	203000	220000	229000	191000	159000	174000	314000	275000	338000	175000	155000	142000
pmb0751	321.1	147.5	3.78	320.1	[M+H]+	-	5-O-p-Coumaroyl shikimic acid	Quinate and its derivatives	190000	256000	279000	371000	347000	158000	160000	161000	152000	173000	269000	164000
pmb0752	369.1	177.5	2.99	368.1	[M+H]+	C02572	3-O-Feruloyl quinic acid	Quinate and its derivatives	5550000	9530000	10200000	11000000	8400000	5990000	11500000	10400000	8080000	6200000	11800000	8790000
pmb0758	491.1	329.7	3.04	490.1	[M+H]+	-	Anisic acid O-feruloyl hexoside	Others	59000	124000	142000	222000	165000	76700	192000	138000	126000	138000	124000	122000
pmb0764	144.1	142.9	2.62	143.1	[M+H]+	C04294	4-Methyl-5-thiazoleethanol	Others	451000	572000	542000	418000	569000	491000	581000	597000	584000	390000	450000	328000
pmb0774	177.2	160.5	1.55	176.2	[M+H]+	C17203	N-hydroxy tryptamine	Tryptamine derivatives	1530000	1400000	1480000	9	9	9	3290000	4340000	2050000	1460000	2050000	2100000
pmb0776	337.1	177.5	2.73	336.1	[M+H]+	-	N-Feruloyl tryptamine	Tryptamine derivatives	53700	103000	123000	92100	25800	34100	170000	230000	209000	65800	50400	27000
pmb0782	86.1	56	1.16	85.1	[M+H]+	C01746	Piperidine	Alkaloids	1740000	2450000	2470000	2330000	2230000	2920000	1770000	2280000	2150000	2110000	2590000	2390000
pmb0785	130.1	128.4	4.64	129.1	[M+H]+	C06323	Isoquinoline	Alkaloids	294000	324000	311000	270000	275000	384000	221000	231000	266000	226000	211000	188000
pmb0786	180	84.2	0.61	179	[M+H]+	C00329	Glucosamine	Carbohydrates	2340000	2410000	2670000	4230000	3250000	9680000	1390000	9	9	9	1590000	1430000
pmb0789	332.1	314.7	1.14	331.1	[M+H]+	-	Pyridoxine O-glucoside	Vitamins	756000	1390000	1410000	953000	1040000	671000	1530000	1450000	1590000	1740000	1860000	1730000
pmb0790	494.1	332.8	1.46	493.1	[M+H]+	-	Pyridoxine di-O-hexoside	Vitamins	121000	272000	262000	94900	108000	75100	317000	319000	352000	345000	379000	386000
pmb0800	123.1	80.3	1.49	122.1	[M+H]+	C00153	Niacinamide	Vitamins	1390000	2210000	2180000	1790000	1240000	1110000	2730000	3010000	2810000	1930000	2070000	2220000
pmb0801	346	184.5	1.57	345	[M+H]+	-	4-Pyridoxic acid O-hexoside	Vitamins	5170000	10700000	10400000	14100000	16200000	8680000	8110000	7730000	8020000	6500000	6650000	6220000
pmb0802	220.2	202.7	2.28	219.2	[M+H]+	C00864	D-Pantothenic acid	Vitamins	8310000	10500000	10100000	9180000	10200000	9420000	10200000	9440000	9000000	12700000	12700000	12500000
pmb0808	353.1	272.8	2.81	352.1	[M+H]+	-	"6,7-dihydroxycoumarin 6-O-quinic acid"	Coumarins	40400	82700	77900	26300	9	9	115000	137000	118000	9	9	9
pmb0818	206.1	147.5	2.48	205.1	[M+H]+	C05660	Methoxyindoleacetic acid	Indole derivatives	4120000	5200000	4850000	6890000	6660000	7710000	4290000	4950000	4530000	3210000	3120000	3030000
pmb0819	157	130.4	2.45	156	[M+H]+	C02938	3-Indoleacetonitrile	Indole derivatives	626000	762000	721000	1000000	1100000	1070000	608000	698000	639000	445000	447000	432000
pmb0829	98.9	81.1	0.89	97.9	[M+H]+	C00009	Phosphoric acid	Organic acids	47900000	82900000	84100000	84400000	77400000	75200000	82300000	101000000	87800000	46500000	48100000	41000000
pmb0835	611.2	611.1	2.38	610.2	[M+H]+	-	Gallocatechin-gallocatechin	Catechin derivatives	2110000	4780000	4740000	11000000	11600000	3770000	1240000	1210000	1110000	712000	810000	772000
pmb0837	577.1	425.4	2.87	576.1	[M+H]+	-	Procyanidin A3	Proanthocyanidins	1420000	3400000	3730000	9	9	9	6670000	8090000	7400000	9	9	9
pmb0848	494.3	184.6	7.82	493.3	[M+H]+	-	LysoPC 16:1 (2n isomer)	Lipids_Glycerophospholipids	20100000	27700000	27000000	69800000	43800000	46000000	12300000	37800000	18500000	4880000	4170000	3730000
pmb0852	520.3	502.3	8.36	519.3	[M+H]+	-	LysoPC 18:2	Lipids_Glycerophospholipids	2500000	3440000	3090000	2750000	2590000	2690000	2540000	2840000	2570000	2400000	2350000	2420000
pmb0854	518.3	459.6	8.74	517.3	[M+H]+	-	LysoPC 18:3	Lipids_Glycerophospholipids	4000000	6150000	6970000	17300000	18400000	20800000	14200000	12600000	15300000	13200000	13400000	15500000
pmb0855	496.3	478.3	8.74	495.3	[M+H]+	-	LysoPC 16:0	Lipids_Glycerophospholipids	1650000	2350000	2190000	5560000	6920000	7140000	6170000	6760000	6830000	5050000	5630000	5350000
pmb0856	480.5	339.9	8.8	479.5	[M+H]+	-	LysoPE 18:1 (2n isomer)	Lipids_Glycerophospholipids	5290000	5910000	5530000	9540000	4960000	6820000	2600000	5040000	3620000	3360000	2190000	2040000
pmb0859	522.4	184.5	8.86	521.4	[M+H]+	-	LysoPC 18:1 (2n isomer)	Lipids_Glycerophospholipids	5110000	6610000	6550000	9220000	5520000	6630000	4510000	8890000	6000000	2620000	2100000	1990000
pmb0862	440.1	422.7	6.71	439.1	[M+H]+	-	LysoPC 12:1	Lipids_Glycerophospholipids	99400	120000	116000	113000	148000	144000	98500	104000	103000	79900	75800	71100
pmb0863	492.3	184.5	7.29	491.3	[M+H]+	-	LysoPC 16:2 (2n isomer)	Lipids_Glycerophospholipids	5160000	7440000	7330000	8330000	5790000	6900000	7790000	19100000	11200000	2630000	2080000	1950000
pmb0864	426.3	285.8	7.63	425.3	[M+H]+	-	LysoPE 14:0	Lipids_Glycerophospholipids	1340000	1240000	1230000	3240000	3520000	4630000	3950000	3880000	4170000	3610000	3160000	3420000
pmb0865	518.2	500.3	7.67	517.2	[M+H]+	-	LysoPC 18:3 (2n isomer)	Lipids_Glycerophospholipids	6930000	10900000	10400000	11300000	6900000	9400000	9740000	25600000	15000000	3410000	2980000	2900000
pmb0866	468.1	450.5	7.68	467.1	[M+H]+	-	LysoPC 14:0	Lipids_Glycerophospholipids	5180000	6800000	6520000	8150000	8830000	9630000	11200000	12700000	12700000	7360000	7380000	7920000
pmb0873	520	125	8.19	519	[M+H]+	-	LysoPC 18:2 (2n isomer)	Lipids_Glycerophospholipids	20600000	27100000	27300000	34800000	19900000	27900000	20500000	48900000	31300000	8380000	6660000	5930000
pmb0874	478.6	337.9	8.32	477.6	[M+H]+	-	LysoPE 18:2 (2n isomer)	Lipids_Glycerophospholipids	3010000	3160000	3260000	2610000	2410000	2750000	2880000	2680000	2650000	3310000	2570000	2630000
pmb0877	480.1	339.9	8.8	479.1	[M+H]+	-	LysoPE 18:1	Lipids_Glycerophospholipids	7090000	7650000	7710000	12200000	6590000	8920000	3250000	5820000	4780000	4480000	3020000	2710000
pmb0880	482.1	314	8.92	481.1	[M+H]+	-	LysoPE 18:0 (2n isomer)	Lipids_Glycerophospholipids	12800	21700	20600	45500	46400	54800	52400	39800	51200	214000	215000	263000
pmb0881	478.1	337.8	8.95	477.1	[M+H]+	-	LysoPE 18:2	Lipids_Glycerophospholipids	3480000	3440000	2610000	2340000	1500000	2120000	1750000	3300000	2620000	2490000	2170000	3080000
pmb0882	522.1	125.5	9.04	521.1	[M+H]+	-	LysoPC 18:1	Lipids_Glycerophospholipids	1140000	1570000	1480000	1420000	1270000	1240000	1150000	1230000	1090000	1020000	992000	974000
pmb0883	482.1	341.9	9.8	481.1	[M+H]+	-	LysoPE 18:0	Lipids_Glycerophospholipids	226000	266000	280000	1560000	901000	1350000	1400000	1560000	1880000	2070000	1720000	1360000
pmb0885	291	273.9	6.65	290	[M+H]+	-	"4-oxo-9Z,11Z,13E,15E-octadecatetraenoic acid"	Lipids_Fatty acids	6000	6900	7500	7890	6120	7590	9	9	3030	3100	3580	3180
pmb0889	279.3	201.5	8.91	278.3	[M+H]+	C08364	Punicic acid	Lipids_Fatty acids	54200000	60100000	59300000	28800000	26500000	31400000	39400000	33900000	40200000	54400000	64000000	59700000
pmb0890	355.1	337.9	10.45	354.1	[M+H]+	-	MAG (18:2)	Lipids_Glycerolipids	18300000	15500000	19600000	35000000	25600000	23700000	15800000	21500000	23100000	7330000	11100000	11400000
pmb0896	265.1	177.5	2.44	264.1	[M+H]+	-	N'-Feruloyl putrescine	Phenolamides	1540000	3070000	3140000	5210000	4310000	3380000	3590000	2380000	4450000	2290000	1750000	2290000
pmb0907	265.1	177.5	2.44	264.1	[M+H]+	C10497	N-Feruloyl putrescine	Phenolamides	4160000	9430000	9760000	13100000	11700000	9620000	9090000	5810000	11900000	5980000	5450000	6610000
pmb0952	265.1	140.4	0.74	264.1	[M+H]+	C00378	Thiamine	Vitamins	182000	308000	301000	102000	1240000	1690000	36100	23700	19200	59900	36800	50800
pmb0962	235.1	118.4	0.77	234.1	[M+H]+	-	Lysine butyrate	Amino acid derivatives	1320000	1930000	1860000	1990000	1340000	1600000	1420000	1220000	1410000	2300000	2040000	1120000
pmb0964	366.2	203.5	0.81	365.2	[M+H]+	-	iP7G	Nucleotide and its derivates	628000	957000	843000	725000	648000	354000	604000	702000	745000	638000	536000	547000
pmb1096	118	58.2	2.47	117	[M+H]+	C00463	Indole	Indole derivatives	3500000	6370000	6160000	7960000	8110000	6490000	5380000	5700000	5240000	4000000	3650000	3450000
pmb1178	339.1	177.5	3.21	338.1	[M+H]+	-	O-Feruloyl 2-hydroxylcoumarin	Coumarins	885000	959000	1150000	2540000	1890000	1250000	9	9	9	9	9	9
pmb1318	457.2	191.5	4.51	456.2	[M+H]+	-	8-Methyl-2-oxo-4-phenyl-2H-chromen-7-yl 4-(hexyloxy)benzoate	Benzoic acid derivatives	273000	448000	459000	110000	91600	94400	1070000	1050000	1040000	77300	9	74400
pmb1452	275.1	258.1	5.98	274.1	[M+H]+	-	N-Lauryldiethanolamine	Others	100000	174000	143000	164000	164000	150000	230000	202000	245000	130000	157000	133000
pmb1562	351	259.9	7.75	350	[M+H]+	-	MAG (18:4) isomer3	Lipids_Glycerolipids	254000	162000	170000	189000	141000	265000	107000	266000	157000	72700	114000	107000
pmb1605	353.3	335.8	8.55	352.3	[M+H]+	-	MAG (18:3) isomer3	Lipids_Glycerolipids	1040000	789000	816000	155000	189000	199000	367000	536000	511000	1070000	944000	1090000
pmb1626	534.4	262.9	9.15	533.4	[M+H]+	-	MGMG (18:2) isomer1	Lipids_Glycerolipids	1110000	1410000	1290000	552000	568000	551000	1240000	1560000	1140000	1220000	1450000	1410000
pmb1650	279.2	149.4	9.64	278.2	[M+H]+	-	"Octadeca-11E,13E,15Z-trienoic acid"	Lipids_Fatty acids	1370000	1780000	1680000	1480000	1180000	1380000	2000000	1510000	1570000	1360000	1380000	1620000
pmb1652	149	121.3	9.64	148	[M+H]+	-	Phthalic anhydride	Others	6860000	5240000	5480000	5930000	4610000	6460000	7220000	5210000	4840000	5550000	5710000	6220000
pmb1656	353.1	173.7	9.85	352.1	[M+H]+	-	MAG (18:3) isomer4	Lipids_Glycerolipids	203000	154000	177000	244000	172000	206000	119000	224000	193000	65100	82000	82700
pmb1754	184	83.2	0.78	183	[M+H]+	C00588	O-Phosphocholine	Cholines	2840000	3140000	2960000	4090000	3900000	3010000	4580000	3480000	3640000	1560000	1800000	1710000
pmb1912	474.2	327.8	2.42	473.2	[M+H]+	C00234	10-Formyl-THF	Others	12600000	21500000	23400000	24100000	23600000	21700000	22000000	22700000	22600000	18200000	18500000	18300000
pmb2165	412.3	184.7	5.64	411.3	[M+H]+	-	LysoPC 10:0	Lipids_Glycerophospholipids	33200	27500	25200	30900	38300	45200	26300	29300	28300	19700	16300	19100
pmb2211	343.1	240.9	6.53	342.1	[M+H]+	-	Cocamidopropyl betaine	Others	2840000	2290000	2390000	1330000	1400000	1670000	2170000	2470000	2740000	1490000	1600000	1280000
pmb2251	694.1	335.8	7.53	693.1	[M+H]+	-	DGMG (18:1)	Lipids_Glycerolipids	3380000	2710000	2230000	1900000	1020000	1150000	3100000	7460000	4260000	1140000	1700000	1790000
pmb2260	480.1	184.5	7.66	479.1	[M+H]+	-	LysoPC 15:1	Lipids_Glycerophospholipids	1040000	1550000	1490000	976000	1060000	1030000	1390000	1660000	1560000	1020000	1030000	1040000
pmb2319	482.3	184.5	8.2	481.3	[M+H]+	-	LysoPC 15:0	Lipids_Glycerophospholipids	3170000	3700000	3650000	11700000	14500000	15800000	15200000	11800000	14900000	7860000	8630000	8660000
pmb2325	353.1	261.8	8.33	352.1	[M+H]+	-	MAG (18:3) isomer2	Lipids_Glycerolipids	634000	454000	408000	416000	305000	376000	454000	527000	519000	393000	554000	611000
pmb2363	357.2	339.9	8.69	356.2	[M+H]+	-	MAG (18:1) isomer1	Lipids_Glycerolipids	5320000	3710000	3840000	2620000	1200000	1390000	1590000	3680000	1890000	1180000	1690000	1710000
pmb2369	772.1	478.4	8.73	771.1	[M+H]+	-	PC 19:2/16:0	Lipids_Glycerophospholipids	38300	42400	36200	150000	181000	202000	189000	144000	179000	234000	243000	228000
pmb2383	534.1	338	8.99	533.1	[M+H]+	-	MGMG (18:2) isomer2	Lipids_Glycerolipids	180000	215000	211000	103000	53700	48400	203000	407000	224000	100000	138000	128000
pmb2388	524.1	507.4	8.84	523.1	[M+H]+	-	LysoPC 18:0 (2n isomer)	Lipids_Glycerophospholipids	13700000	16500000	16700000	21000000	12800000	15300000	9260000	21100000	12800000	5710000	4680000	4210000
pmb2406	510.1	510.4	9.29	509.1	[M+H]+	-	LysoPC 17:0	Lipids_Glycerophospholipids	766000	1620000	1190000	6660000	7280000	9670000	8420000	8250000	9500000	7720000	7950000	8610000
pmb2444	353.2	261.8	10	352.2	[M+H]+	-	MAG (18:3) isomer1	Lipids_Glycerolipids	11400000	9650000	10600000	13200000	10400000	12300000	6370000	8150000	8060000	5430000	6100000	6130000
pmb2507	213.1	78.9	0.97	214.1	[M-H]-	C00672	2-Deoxyribose 1-phosphate	Carbohydrates	535000	789000	779000	1480000	1160000	1470000	851000	896000	1220000	126000	178000	203000
pmb2554	529.1	355.9	2.23	530.1	[M-H]-	-	5-O-Feruloyl quinic acid glucoside	Quinate and its derivatives	46400	60600	53800	45500	52700	46400	81100	71300	97900	22800	28200	18800
pmb2556	345.1	167.2	2.35	346.1	[M-H]-	-	Syringaldehyde O-glucoside	Others	10800	9980	9970	18200	14100	12800	7390	6750	4760	7760	1950	10100
pmb2561	190.1	84	2.43	191.1	[M-H]-	C02712	N-Acetylmethionine	Amino acid derivatives	7700	9420	11000	10100	9710	8400	9290	24500	8960	5680	7920	7260
pmb2586	593.1	549.4	3.49	594.1	[M-H]-	-	Gallocatechin-catechin	Catechin derivatives	45200	42700	40700	46200	36000	68600	38000	51600	55200	20300	25300	30800
pmb2591	245	203.2	3.83	246	[M-H]-	C03137	Acetyl tryptophan	Amino acid derivatives	176000	158000	161000	336000	252000	196000	79600	302000	42000	14700	41700	22000
pmb2601	307.1	161.2	4.33	308.1	[M-H]-	-	7-hydroxycoumarin-beta-rhamnoside	Coumarins	17400	16900	16900	9	9	9	22700	24500	26000	13100	15200	17000
pmb2620	207.1	192.1	5.49	208.1	[M-H]-	-	"3,4-Dimethoxycinnamic acid"	Hydroxycinnamoyl derivatives	353000	386000	375000	573000	422000	522000	194000	213000	225000	232000	188000	231000
pmb2640	199	181.3	9.62	200	[M-H]-	C02679	Lauric acid (C12:0)	Lipids_Fatty acids	33500	36800	36100	36300	35000	33700	29200	20000	24500	20300	20400	27600
pmb2643	225	207.2	10	226	[M-H]-	C08322	Myristoleic acid (C14:1)	Lipids_Fatty acids	36200	27600	39100	33900	37600	33400	44600	38700	44900	39400	42300	53700
pmb2653	649.1	503.3	0.74	650.1	[M-H]-	-	D(+)-Melezitose O-rhamnoside	Carbohydrates	71400	92000	82900	56100	46400	65200	49400	64500	69900	126000	122000	88700
pmb2654	460.1	118.2	0.74	461.1	[M-H]-	-	Anthranilate O-hexosyl-O-hexoside	Benzoic acid derivatives	214000	206000	213000	121000	177000	157000	214000	230000	272000	338000	242000	253000
pmb2657	289.1	191.2	0.69	290.1	[M-H]-	C03406	Argininosuccinate	Organic acids	7400	15000	14100	4880	13300	8130	14000	23800	18000	6950	5500	7960
pmb2684	328.1	134.2	1.84	329.1	[M-H]-	C00575	Cyclic AMP	Nucleotide and its derivates	452000	476000	437000	439000	441000	434000	511000	455000	436000	529000	543000	661000
pmb2778	295	183.3	8.92	296	[M-H]-	-	"9,10-EODE"	Lipids_Fatty acids	21300000	22300000	21600000	11100000	11200000	12200000	21300000	12400000	19700000	23600000	25900000	30300000
pmb2786	293	275.4	8.37	294	[M-H]-	-	9-HOTrE	Lipids_Fatty acids	239000	236000	236000	296000	266000	290000	198000	144000	182000	198000	239000	232000
pmb2787	293.2	249.9	9.12	294.2	[M-H]-	-	9-KODE	Lipids_Fatty acids	251000	248000	240000	189000	175000	209000	285000	225000	255000	212000	250000	275000
pmb2789	309	291.5	7.8	310	[M-H]-	-	13-HpOTrE(r)	Lipids_Fatty acids	41600	31800	33300	29800	27200	27900	43300	37600	34600	21100	32800	43200
pmb2791	309.1	291.4	7.5	310.1	[M-H]-	-	9-HpOTrE	Lipids_Fatty acids	77500	62400	68200	69600	90100	101000	448000	79300	189000	69300	49800	308000
pmb2792	293	193.2	7.77	294	[M-H]-	-	13-HOTrE(r)	Lipids_Fatty acids	118000	116000	116000	154000	93100	111000	228000	210000	144000	135000	92100	225000
pmb2795	177	145.2	5.43	178	[M-H]-	-	4-Methoxycinnamic acid	Hydroxycinnamoyl derivatives	1290000	1420000	1310000	2780000	1540000	2520000	352000	459000	446000	163000	201000	230000
pmb2799	295	277.5	9.7	296	[M-H]-	-	"12,13-EODE"	Lipids_Fatty acids	1050000	1130000	1120000	602000	504000	687000	1340000	1080000	1080000	824000	901000	1070000
pmb2804	311.1	293.4	7.82	312.1	[M-H]-	C04717	13-HPODE	Lipids_Fatty acids	627000	590000	577000	499000	395000	424000	733000	684000	644000	577000	692000	760000
pmb2819	665.1	323.4	2.23	666.1	[M-H]-	-	O-Caffeoyl maltotriose	Hydroxycinnamoyl derivatives	86500	92300	106000	64200	69000	76600	104000	80600	97300	123000	88900	133000
pmb2826	147	85	0.92	148	[M-H]-	C00815	Citramalate	Organic acids	161000	188000	136000	123000	97100	92300	251000	210000	216000	93600	203000	204000
pmb2831	315.1	153.2	2.53	316.1	[M-H]-	-	Protocatechuic acid O-glucoside	Catechin derivatives	477000	383000	431000	291000	222000	334000	793000	656000	835000	138000	165000	184000
pmb2833	529	329.3	2.23	530	[M-H]-	-	3-O-Feruloyl quinic acid glucoside	Quinate and its derivatives	37000	39500	41100	36100	46400	33900	71000	51800	77000	17000	18000	17200
pmb2835	181.1	151.1	4.02	182.1	[M-H]-	-	Syringaldehyde	Hydroxycinnamoyl derivatives	22100	20700	18600	33800	35000	32400	10900	13300	9950	12700	14900	21900
pmb2855	307	145.2	0.73	308	[M-H]-	-	L-Glutamine O-hexside	Amino acid derivatives	143000	161000	170000	80600	59000	524000	70400	149000	132000	86600	103000	115000
pmb2857	308.1	128.2	0.72	309.1	[M-H]-	-	L-Glutamic acid O-glucoside	Amino acid derivatives	391000	433000	392000	685000	616000	880000	200000	191000	229000	200000	290000	283000
pmb2858	665.1	485.3	0.77	666.1	[M-H]-	C02052	Maltotetraose	Carbohydrates	58500	74900	58300	37400	69800	60000	92700	119000	200000	47600	23500	25800
pmb2867	350.1	144.2	1.78	351.1	[M-H]-	-	Kynurenic acid O-hexside	Organic acids	17000	23600	21200	47800	35100	31600	11800	10600	9	7030	9	9
pmb2871	315.1	152.1	1.9	316.1	[M-H]-	-	"2,5-dihydroxy benzoic acid O-hexside"	Benzoic acid derivatives	2480000	2910000	2760000	2010000	2060000	1990000	6220000	5110000	5960000	613000	733000	978000
pmb2873	214.1	134.2	3.69	215.1	[M-H]-	-	3-(2-Naphthyl)-D-alanine	Amino acid derivatives	106000	138000	125000	91100	132000	254000	133000	92000	185000	151000	202000	363000
pmb2922	565.1	323.3	1.12	566.1	[M-H]-	C00029	Uridine 5'-diphospho-D-glucose	Nucleotide and its derivates	239000	350000	300000	693000	312000	411000	386000	332000	433000	78200	120000	120000
pmb2928	331	313.7	2.09	332	[M-H]-	-	Gallic acid O-Hexoside	Benzoic acid derivatives	35500	47900	44800	49900	28800	24900	72500	88200	74000	26200	31000	30500
pmb2933	311.1	149.2	2.19	312.1	[M-H]-	-	Caftaric acid	Hydroxycinnamoyl derivatives	61200	66400	72600	37600	41300	48300	114000	94800	104000	69000	66400	72600
pmb2938	353.1	191.2	2.91	354.1	[M-H]-	-	4-O-Caffeoyl quinic acid (criptochlorogenic acid)	Quinate and its derivatives	20600	32600	23500	83100	73500	45400	19300	17100	13100	17900	18100	19700
pmb2940	385.1	223.2	3.15	386.1	[M-H]-	-	1-O-beta-D-Glucopyranosyl sinapate	Hydroxycinnamoyl derivatives	820000	774000	771000	1410000	1270000	967000	883000	865000	789000	13500	21800	39600
pmb2948	346.1	211.1	0.83	347.1	[M-H]-	C01367	Adenosine 3'-monophosphate	Nucleotide and its derivates	28000	27600	27900	22000	20100	25900	56100	37000	25400	22600	27600	18100
pmb2954	771.1	609.5	2.53	772.1	[M-H]-	-	Luteolin O-hexosyl-O-hexosyl-O-hexoside	Flavone	116000	101000	103000	9	9	9	237000	208000	217000	9	9	41600
pmb2957	465.1	285.3	2.5	466.1	[M-H]-	-	Cyanidin O-syringic acid	Anthocyanins	957000	1190000	1140000	3490000	2500000	2560000	296000	377000	301000	51400	49200	75300
pmb2959	489.1	285.3	2.89	490.1	[M-H]-	-	Cyanidin O-acetylhexoside	Anthocyanins	474000	522000	532000	1850000	1210000	1300000	9	9	9	9	9	9
pmb2961	547.1	503.4	2.87	548.1	[M-H]-	-	Peonidin O-malonylhexoside	Anthocyanins	18600	21800	11100	9	9	11900	14400	8140	13700	7920	6580	8510
pmb2965	619.1	531.3	3.2	620.1	[M-H]-	-	Cyanidin O-diacetyl-hexoside-O-glyceric acid	Anthocyanins	24300	19300	17800	82300	58200	58900	9	9	9	9	9	9
pmb2968	623.1	311.3	2.21	624.1	[M-H]-	-	Chrysoeriol C-hexosyl-O-hexoside	Flavone C-glycosides	8000	10500	10600	4700	7530	5110	11600	12700	10600	12400	14700	17800
pmb2976	755.1	311.4	3.64	756.1	[M-H]-	-	Chrysoeriol C-pentosyl-O-hexosyl-O-hexoside	Flavone C-glycosides	12800	11400	9660	5710	5250	9	16800	10900	19800	7520	8030	17400
pmb2978	563.1	269.3	3.93	564.1	[M-H]-	-	Apigenin O-hexosyl-O-pentoside	Flavone	69200	70000	58300	40300	29600	52300	91700	78500	81800	187000	48200	54000
pmb2986	709.1	547.3	2.49	710.1	[M-H]-	-	Chrysoeriol O-hexosyl-O-malonylhexoside	Flavone	12200	10700	9790	9	9	9	11800	9	13800	21100	30500	22700
pmb2987	487.1	283.2	2.57	488.1	[M-H]-	-	Acacetin O-acetyl hexoside	Flavone	109000	132000	129000	114000	126000	174000	111000	87900	103000	93600	96000	135000
pmb2988	624.1	285.3	3.1	625.1	[M-H]-	-	Luteolin O-hexosyl-O-gluconic acid	Flavone	11400	10200	9080	4870	7700	9580	12500	7160	7150	18900	12000	12800
pmb2991	739.1	269.3	3.72	740.1	[M-H]-	-	Apigenin O-hexosyl-O-rutinoside	Flavone	48300	47000	48200	58000	77600	71000	14600	13700	5690	75300	100000	120000
pmb2999	461.1	285.2	3.8	462.1	[M-H]-	-	Chrysoeriol 5-O-hexoside	Flavone	2340000	2400000	2290000	2040000	1810000	2190000	3820000	2320000	4210000	317000	463000	761000
pmb3006	431.1	269.2	4.11	432.1	[M-H]-	C04608	Apigenin 7-O-glucoside (Cosmosiin)	Flavone	389000	424000	394000	389000	310000	613000	303000	532000	310000	382000	218000	212000
pmb3012	461.1	460.9	4.23	462.1	[M-H]-	-	Chrysoeriol 7-O-hexoside	Flavone	697000	788000	681000	962000	1090000	1120000	468000	401000	495000	276000	354000	463000
pmb3013	519.1	315.3	4.28	520.1	[M-H]-	-	Isorhamnetin O-acetyl-hexoside	Flavonol	9170	9020	10900	9	9	9	16800	17300	13500	9	9	9
pmb3014	641.1	285.2	4.5	642.1	[M-H]-	-	Luteolin O-eudesmic acid-O-hexoside	Flavone	35200	31200	27700	9	4390	5320	69100	87900	88400	9	9	9
pmb3019	463.1	299.2	5.71	464.1	[M-H]-	-	Chrysoeriol O-homovanillic acid	Flavone	7940	9510	9500	3990	9680	9380	3500	3550	2480	9	5020	7660
pmb3023	449.1	329.3	3.3	450.1	[M-H]-	-	Eriodictyol C-hexoside	Flavone C-glycosides	1200000	1120000	1110000	642000	541000	644000	2200000	2010000	2130000	21400	42800	32000
pmb3024	447.1	327.3	3.37	448.1	[M-H]-	-	Luteolin C-hexoside	Flavone C-glycosides	519000	465000	446000	570000	468000	401000	344000	372000	301000	463000	663000	1130000
pmb3026	505.1	301.2	3.91	506.1	[M-H]-	-	Quercetin O-acetylhexoside	Flavonol	37200	25700	27300	37300	40600	17800	32200	58500	29500	9	9	41100
pmb3031	403.1	328.2	5.16	404.1	[M-H]-	-	Tricin O-glycerol	Flavone	7380	6100	6490	8340	8580	4090	2150	3530	2560	9	3370	3450
pmb3044	653.1	593.4	4.08	654.1	[M-H]-	-	Tricin di-O-hexoside	Flavone	29000	24600	28800	25800	15300	21800	71900	66400	56500	9	5590	9
pmb3046	491.1	431.2	4.21	492.1	[M-H]-	-	Tricin 7-O-hexoside	Flavone	85500	85200	88500	227000	210000	158000	29700	27900	33200	9	9	26700
pmb3052	525.1	314.5	5.78	526.1	[M-H]-	-	Tricin 4'-O-β-guaiacylglycerol	Flavonolignan	10500	10300	12600	22100	24500	6930	9	12100	9	2460	12800	12600
pmb3055	513.1	191.2	1.82	514.1	[M-H]-	-	p-Coumaroyl quinic acid O-glucuronic acid	Quinate and its derivatives	7330	9800	7480	6460	4830	4780	12300	9770	12000	8570	10000	10100
pmb3056	355.1	181.2	1.93	356.1	[M-H]-	-	Homovanilloyl quinic acid	Quinate and its derivatives	8180	8630	8010	9620	13400	16900	3980	4680	8360	9	9	9
pmb3061	499.1	163.2	2.18	500.1	[M-H]-	-	5-O-p-coumaroyl quinic acid O-hexoside	Quinate and its derivatives	12000	14700	12300	33700	24900	34000	3080	4810	5160	6010	9	8120
pmb3062	385.1	152.2	2.19	386.1	[M-H]-	-	Eudesmoyl quinic acid	Quinate and its derivatives	14800	23300	26000	22200	15900	33700	34900	30700	46700	7370	11100	11200
pmb3068	337.1	155.8	2.84	338.1	[M-H]-	-	1-O-p-Coumaroyl quinic acid	Quinate and its derivatives	120000	113000	102000	338000	326000	339000	21200	20000	20900	36300	43300	37700
pmb3073	709.1	401.3	3.43	710.1	[M-H]-	-	O-p-Coumaroyl quinic acid O-rutinoside derivative	Quinate and its derivatives	12800	13000	16100	9320	5470	9	20100	14200	16100	16100	12800	14700
pmb3074	337.1	190.9	3.46	338.1	[M-H]-	-	3-O-p-Coumaroyl quinic acid	Quinate and its derivatives	1140000	1060000	1010000	678000	664000	966000	2000000	1440000	2330000	415000	557000	685000
pmb3075	319	145.3	3.97	320	[M-H]-	-	3-O-p-Coumaroyl shikimic acid	Quinate and its derivatives	12600	16900	17000	19600	18000	22300	9	9	9	20800	33400	33500
pmb3081	289.1	97	1.09	290.1	[M-H]-	-	Glucarate O-Phosphoric acid	Carbohydrates	731000	1020000	846000	503000	556000	463000	1400000	962000	1530000	986000	1450000	1290000
pmb3088	421.1	241.2	0.69	422.1	[M-H]-	C00689	Trehalose 6-phosphate	Carbohydrates	1850000	2230000	2110000	2470000	2390000	2330000	1920000	1880000	1860000	1240000	1380000	1280000
pmb3093	351.1	132.6	2.44	352.1	[M-H]-	-	"6,7-dihydroxycoumarin 7-O-quinic acid"	Coumarins	50400	60200	68500	53500	44400	50100	121000	133000	115000	10000	12900	14600
pmb3099	153	78.9	1.61	154	[M-H]-	C06608	Diethyl phosphate	Organic acids	673000	740000	743000	793000	874000	734000	2220000	795000	743000	713000	609000	801000
pmb3101	175.1	131.3	2.74	176.1	[M-H]-	C02504	2-Isopropylmalate	Organic acids	199000	222000	192000	185000	177000	376000	184000	242000	240000	172000	174000	223000
pmb3107	359.1	197.1	2.34	360.1	[M-H]-	-	Syringic acid O-glucoside	Benzoic acid derivatives	16200	14700	17200	13300	15200	12700	28200	34800	28600	4300	5610	6110
pmb3114	561.1	271.3	3.45	562.1	[M-H]-	-	Epicatechin-epiafzelechin	Catechin derivatives	13200	12000	13900	9	9	9	24300	27400	27300	9	9	9
pmb3117	452	255.3	8.69	453	[M-H]-	-	LysoPE 16:0	Lipids_Glycerophospholipids	7250000	8220000	8000000	27600000	29300000	31100000	17700000	23700000	20500000	32100000	28100000	21000000
pmb3264	611.1	306.2	1.14	612.1	[M-H]-	C00127	Glutathione oxidized	Amino acid derivatives	396000	461000	399000	368000	447000	402000	380000	309000	368000	230000	267000	280000
pmb3894	329.1	314.3	5.86	330.1	[M-H]-	-	Di-O-methylquercetin	Flavonol	4570000	4280000	4320000	2470000	2300000	3540000	3980000	3320000	3870000	6550000	7220000	7390000
pmb4344	362.1	211.1	1.15	363.1	[M-H]-	C00144	Guanosine 5'-monophosphate	Nucleotide and its derivates	76000	77200	88900	96700	98200	75800	91600	56300	74800	66300	65000	71400
pmb4486	579.1	423.5	2.44	580.1	[M-H]-	C08308	Hordatine B	Phenolamides	37800	37400	34300	20300	23100	21200	38800	33000	39200	63700	59400	57700
pmb4777	337.1	143.2	4.36	338.1	[M-H]-	-	4-Hydroxy-7-methoxycoumarin-beta-rhamnoside	Coumarins	476000	432000	414000	467000	377000	490000	164000	567000	118000	51500	139000	143000
pmb5304	277.1	233.7	10.56	278.1	[M-H]-	C06427	α-Linolenic acid	Lipids_Fatty acids	41100	46900	44200	33400	36400	37200	46900	38300	38100	44900	45900	53100
pmc0066	333.1	137	0.67	332.1	[M+H]+	C06196	2'-Deoxyinosine-5'-monophosphate	Nucleotide and its derivates	3880000	7530000	7300000	7400000	7550000	4910000	9590000	9250000	9000000	10300000	9750000	9990000
pmc0274	167.1	121	1.96	166.1	[M+H]+	C16614	6-Methylmercaptopurine	Nucleotide and its derivates	15200000	17500000	18100000	12400000	12000000	18800000	13800000	18500000	15200000	19700000	23000000	21400000
pmc0281	400.2	136.1	2.05	399.2	[M+H]+	-	Adenosine O-ribose	Nucleotide and its derivates	3950000	5820000	5970000	9970000	8690000	9350000	1950000	2160000	1900000	3700000	5460000	5690000
pmc0304	384.1	252.2	2.19	383.1	[M+H]+	-	Succinyladenosine	Nucleotide and its derivates	14200000	22000000	23000000	28900000	27200000	22600000	14400000	14800000	16100000	18500000	22100000	19000000
pmc0682	133.1	105	4.16	132.1	[M+H]+	-	4-Aminoindole	Indole derivatives	102000	95800	108000	68300	9	49100	146000	153000	171000	61400	66900	72500
pmc0960	544.4	544.4	8.89	543.4	[M+H]+	-	LysoPC 20:4	Lipids_Glycerophospholipids	731000	1180000	1310000	847000	517000	693000	462000	810000	648000	325000	263000	272000
pmc1990	299.1	74.8	6.74	300.1	[M-H]-	-	"4'-Hydroxy-5,7-dimethoxyflavanone"	Flavanone	1070000	1100000	1020000	645000	63700	93500	154000	101000	147000	98100	113000	133000
pmd0017	203	112	0.6	202	[M+H]+	C00750	Spermine	Phenolamides	729000	1080000	1030000	898000	762000	693000	1240000	1400000	1220000	1270000	1330000	1330000
pmd0023	266	134.2	1.88	267	[M-H]-	C00212	Adenosine	Nucleotide and its derivates	4330000	5180000	5010000	4320000	4580000	4310000	5100000	4350000	4760000	5500000	5710000	6070000
pmd0130	468.3	450.5	7.5	467.3	[M+H]+	-	LysoPC 14:0 (2n isomer)	Lipids_Glycerophospholipids	2210000	2860000	2830000	3970000	3140000	3520000	2500000	4390000	3290000	1440000	1490000	1430000
pmd0132	496.3	478.3	8.57	495.3	[M+H]+	-	LysoPC 16:0 (2n isomer)	Lipids_Glycerophospholipids	2160000	2770000	2720000	15000000	12700000	16700000	11000000	14300000	11800000	6150000	7290000	7440000
pmd0136	524.4	507.4	9.69	523.4	[M+H]+	-	LysoPC 18:0	Lipids_Glycerophospholipids	5460000	6990000	6870000	87300000	77800000	106000000	36300000	42200000	46600000	36700000	38000000	40600000
pmd0144	550.4	245.1	9.81	549.4	[M+H]+	-	LysoPC 20:1 (2n isomer)	Lipids_Glycerophospholipids	1000000	1220000	1390000	2760000	1470000	2270000	1070000	3160000	1700000	527000	414000	423000
pmd0145	550.4	245.1	9.9	549.4	[M+H]+	-	LysoPC 20:1	Lipids_Glycerophospholipids	989000	1430000	1520000	2980000	1510000	2240000	1160000	3920000	1810000	547000	449000	430000
pmd0158	424.2	285.8	7.37	425.2	[M-H]-	-	LysoPE 14:0 (2n isomer)	Lipids_Glycerophospholipids	68300	71400	68800	131000	80700	95800	76600	91700	75900	56700	52700	52300
pmd0160	452.3	255.3	8.55	453.3	[M-H]-	-	LysoPE 16:0 (2n isomer)	Lipids_Glycerophospholipids	7560000	7290000	7290000	36300000	34100000	37000000	17800000	31800000	21000000	33600000	33900000	20200000
pme0001	609.2	301.3	4.03	610.19	[M-H]-	C09806	Hesperetin 7-O-neohesperidoside (Neohesperidin)	Flavanone	355000	304000	324000	321000	350000	347000	221000	180000	222000	462000	452000	618000
pme0004	190.1	84	0.83	189.111	[M+H]+	C02427	L-Homocitrulline	Amino acids	349000	388000	330000	405000	211000	354000	487000	429000	497000	295000	274000	298000
pme0005	121	121	1.42	120.044	[M+H]+	C15587	Purine	Nucleotide and its derivates	14300	21000	27700	15600	11900	9	15100	20800	22500	48800	50100	40300
pme0006	116.1	70	0.79	115.063	[M+H]+	C00148	L-Proline	Amino acids	12000000	23300000	23200000	37100000	29500000	34600000	11400000	16800000	10800000	18700000	22900000	23600000
pme0008	176.1	98.9	0.76	175.096	[M+H]+	C00327	L-Citrulline	Amino acids	1960000	1980000	2000000	1380000	1440000	1150000	2760000	2350000	3330000	1390000	1520000	1770000
pme0009	104	73.9	0.72	105.043	[M-H]-	C00065	L-Serine	Amino acids	423000	522000	512000	350000	229000	287000	556000	770000	821000	525000	674000	554000
pme0011	132	99.9	0.71	133.037	[M-H]-	C00049	L-Aspartic acid	Amino acids	846000	780000	829000	1280000	1170000	872000	701000	584000	528000	482000	600000	636000
pme0013	146.1	102.1	0.72	147.053	[M-H]-	C00025	L-Glutamic acid	Amino acids	7040000	7900000	7770000	10500000	7550000	6610000	6260000	5180000	5710000	6170000	7920000	7360000
pme0016	241	119.9	0.77	240.024	[M+H]+	C00491	L-(-)-Cystine	Amino acids	44700	69200	57600	110000	71900	106000	50500	49800	46400	26900	53200	41200
pme0018	130.1	130.1	1.24	131.095	[M-H]-	C00123	L-Leucine	Amino acids	176000	166000	179000	176000	156000	271000	139000	205000	179000	174000	196000	204000
pme0020	164.1	147.1	1.97	165.079	[M-H]-	C00079	L-Phenylalanine	Amino acids	10400000	11400000	11300000	8290000	8100000	13300000	9940000	11800000	10500000	12000000	14800000	15200000
pme0022	118	100.9	0.74	119.058	[M-H]-	C00188	L-Threonine	Amino acids	261000	333000	299000	240000	206000	252000	281000	408000	334000	320000	390000	333000
pme0024	124	79.7	0.75	125.015	[M-H]-	C00245	2-Aminoethanesulfonic acid	Organic acids	97700	108000	100000	125000	117000	150000	68300	59800	65000	65500	70000	81300
pme0026	147	83.2	0.68	146.106	[M+H]+	C00047	L-(+)-Lysine	Amino acids	7300000	10900000	10800000	15500000	14600000	12900000	11700000	9760000	11000000	6650000	6170000	6320000
pme0030	182.1	136.1	1.13	181.074	[M+H]+	C00082	L-(-)-Tyrosine	Amino acids	3580000	3670000	3590000	3020000	2960000	4530000	2920000	3690000	3450000	3630000	3920000	3920000
pme0031	127	110	1.56	126.043	[M+H]+	C00178	Thymine	Nucleotide and its derivates	107000	203000	179000	391000	285000	284000	87200	112000	109000	95700	132000	104000
pme0032	135	92	1.29	136.038	[M-H]-	C00262	Hypoxanthine	Nucleotide and its derivates	262000	242000	259000	327000	177000	220000	210000	399000	210000	210000	334000	266000
pme0036	154.1	92.9	0.7	155.07	[M-H]-	C00135	L-Histidine	Amino acids	589000	690000	704000	736000	809000	1130000	487000	544000	558000	536000	543000	558000
pme0038	112	95	0.75	111.043	[M+H]+	C00380	Cytosine	Nucleotide and its derivates	758000	1160000	1240000	1710000	1660000	1510000	951000	664000	851000	982000	848000	945000
pme0039	118.1	71.8	0.84	117.079	[M+H]+	C00183	L-Valine	Amino acids	5180000	9210000	9060000	10800000	10900000	11200000	7520000	9300000	9250000	6280000	7590000	6840000
pme0042	173.1	131.1	0.71	174.112	[M-H]-	C00062	L-(+)-Arginine	Amino acids	9640000	11500000	10500000	14900000	15500000	14100000	9060000	8820000	8750000	8320000	8260000	8810000
pme0050	203	116.1	2.47	204.09	[M-H]-	C00078	L-Tryptophan	Amino acids	23200000	23900000	23600000	31700000	33500000	39300000	21100000	21000000	20000000	18100000	16600000	19300000
pme0056	145.1	101	2.63	146.058	[M-H]-	-	"2,3-dimethylsuccinic acid"	Amino acid derivatives	230000	273000	298000	408000	391000	464000	244000	175000	247000	214000	173000	239000
pme0057	136	89.9	0.81	135.035	[M+H]+	C00155	DL-homocysteine	Amino acids	139000	259000	170000	163000	152000	217000	151000	215000	185000	129000	201000	195000
pme0062	515.3	497.5	5.77	516.309	[M-H]-	C08796	Cucurbitacin D	Terpenoids	14400	13800	9870	18300	17000	17400	6930	5080	8750	6390	9170	14000
pme0066	116.1	73.9	0.69	117.054	[M-H]-	C00581	Guanidineacetic acid	Amino acid derivatives	53700	67800	72800	73000	73100	60800	43000	37400	30200	71900	65100	71300
pme0076	190.1	130.1	1.23	189.064	[M+H]+	C00624	N-Acetyl-L-glutamic acid	Amino acid derivatives	1470000	1480000	1380000	1760000	1570000	1960000	1140000	1410000	1280000	1010000	1220000	1100000
pme0088	285	133.1	5.04	286	[M-H]-	C01514	Luteolin	Flavone	9980000	9600000	9450000	5130000	4150000	3240000	2140000	4590000	1940000	1590000	4400000	39900000
pme0094	447.3	284.1	2.55	448.3	[M-H]-	C08604	Cyanidin 3-O-glucoside (Kuromanin)	Anthocyanins	162000	174000	176000	546000	391000	405000	9	9	9	9	9	9
pme0108	126.1	126.1	1.13	125.059	[M+H]+	C02376	5-Methylcytosine	Nucleotide and its derivates	36100	102000	84900	60400	35300	41500	70800	102000	75000	93200	80600	41400
pme0109	212.2	166.1	1.22	211.084	[M+H]+	C07194	"(-)-3-(3,4-Dihydroxyphenyl)-2-methylalanine"	Amino acid derivatives	222000	219000	227000	138000	1350000	130000	59600	68800	73400	66900	75000	68000
pme0118	110.1	65.9	2.88	111.032	[M-H]-	C05942	Pyrrole-2-carboxylic acid	Amino acid derivatives	41000	37300	32800	87900	82800	116000	15900	21900	15200	23000	27600	25800
pme0120	118.2	101	0.8	117.079	[M+H]+	C00431	5-Aminovaleric acid	Amino acid derivatives	44300	48400	49800	226000	70900	58200	62100	78200	64100	60000	74100	60600
pme0122	189.2	84	1.02	188.116	[M+H]+	C02727	N6-Acetyl-L-lysine	Amino acid derivatives	795000	798000	741000	2130000	862000	1760000	516000	642000	865000	214000	310000	302000
pme0124	173.2	116.1	0.79	172.085	[M+H]+	-	Glycyl-L-proline	Amino acid derivatives	24800	15800	18100	20100	32000	44200	27600	25200	18500	22800	24200	15900
pme0128	159.2	88	0.75	160.085	[M-H]-	C00993	D-Alanyl-D-Alanine	Amino acid derivatives	8320	10900	7810	7220	11700	9800	6970	8020	12100	7490	8150	8360
pme0132	279.3	147.1	2.44	280.106	[M-H]-	-	Asp-phe	Amino acid derivatives	84000	86300	74500	64900	78600	90000	92400	85600	93800	94600	92200	102000
pme0137	187.2	127.1	1.17	188.08	[M-H]-	-	Nα-Acetyl-L-glutamine	Amino acid derivatives	277000	338000	308000	481000	399000	428000	393000	409000	407000	100000	121000	138000
pme0151	115	115.1	1.19	114.043	[M+H]+	C00429	Dihydrouracil	Nucleotide and its derivates	16900	29700	24300	29200	9	16300	22600	21600	27200	22900	22400	30900
pme0152	129.1	86	1.5	128.059	[M+H]+	C00906	"5,6-Dihydro-5-methyluracil"	Nucleotide and its derivates	131000	167000	165000	192000	184000	147000	136000	137000	117000	152000	159000	137000
pme0161	118.1	101	0.74	119.058	[M-H]-	C00263	L-Homoserine	Amino acids	10300	14600	12500	15800	6490	14600	10700	10900	13700	13700	14400	9020
pme0163	335.1	122.8	0.79	334.057	[M+H]+	C00455	β-Nicotinamide mononucleotide	Nucleotide and its derivates	1250000	2450000	2410000	945000	1120000	722000	2840000	2970000	3270000	2450000	2400000	2410000
pme0166	167.1	110	1.98	166.049	[M+H]+	C16358	1-Methylxanthine	Nucleotide and its derivates	64300	80800	82700	31100	23900	9	171000	134000	142000	75100	75700	70800
pme0170	217.1	158.1	1.12	216.122	[M+H]+	-	Nα-Acetyl-L-arginine	Amino acid derivatives	194000	283000	276000	422000	438000	686000	9	9	9	158000	131000	101000
pme0173	130.1	73.8	1.28	131.058	[M-H]-	-	N-Propionylglycine	Amino acid derivatives	128000	159000	131000	178000	151000	142000	97800	125000	69600	100000	162000	184000
pme0176	263.1	145.1	3.16	264.111	[M-H]-	C04148	Phenylacetyl-L-glutamine	Amino acid derivatives	18900	20100	19100	24400	23600	23200	17600	16000	15800	18500	19700	21500
pme0181	170.1	124.1	0.72	169.085	[M+H]+	C01152	1-Methylhistidine	Amino acid derivatives	259000	241000	251000	404000	302000	382000	159000	186000	190000	167000	165000	168000
pme0183	152.1	135.1	0.85	151.049	[M+H]+	-	2-Hydroxy-6-aminopurine	Nucleotide and its derivates	3060000	3560000	3530000	2340000	1730000	1960000	1830000	2350000	2030000	5090000	5600000	6410000
pme0190	187.1	130.1	1.93	188.116	[M-H]-	C02155	N-Glycyl-L-leucine	Amino acid derivatives	35400	37000	37900	29000	25300	39900	35900	49300	36400	37500	42400	58700
pme0197	609.2	609.1	3.62	610.153	[M-H]-	C05625	Quercetin 3-O-rutinoside (Rutin)	Flavonol	436000	409000	343000	68000	54600	74900	968000	893000	881000	26700	78100	34100
pme0205	289.1	125	2.99	290.079	[M-H]-	C06562	Catechin	Catechin derivatives	1780000	1470000	1510000	9	9	9	3400000	3580000	3220000	9	9	9
pme0226	131.1	71.8	0.73	132.054	[M-H]-	C00152	L-Asparagine	Amino acids	11200000	11300000	11400000	16600000	18400000	16400000	6870000	6050000	6120000	8240000	8820000	9280000
pme0231	247.1	130.1	4.03	246.1	[M+H]+	-	N-(3-Indolylacetyl)-L-alanine	Amino acid derivatives	8150	23000	18200	31700	20600	15300	12300	17400	11700	9	10900	10800
pme0233	188	144.1	2.71	189.043	[M-H]-	C01717	Kynurenic acid	Organic acids	338000	346000	384000	629000	456000	578000	344000	320000	330000	112000	160000	268000
pme0237	183.1	137.1	4.63	182.058	[M+H]+	-	"Ethyl 3,4-Dihydroxybenzoate (Ethyl protocatechuate)"	Organic acids	59400	60000	59800	112000	55200	47600	62900	63100	65200	70000	54500	55800
pme0240	121	77	4.53	122.037	[M-H]-	C00180	Benzoic acid	Benzoic acid derivatives	1980000	1930000	1890000	1890000	710000	861000	1880000	1090000	1170000	1060000	976000	1300000
pme0243	131	86.9	1.9	132.042	[M-H]-	C00489	Glutaric acid	Organic acids	661000	770000	759000	1080000	1070000	1160000	779000	654000	671000	438000	528000	615000
pme0245	145.1	80.9	2.63	146.058	[M-H]-	C06104	Adipic acid	Organic acids	308000	295000	322000	448000	438000	519000	271000	244000	280000	218000	238000	264000
pme0246	122	80.1	0.78	121.02	[M+H]+	C00097	L-Cysteine	Amino acids	11800	14300	14200	12100	148000	140000	12700	21500	9400	32100	31900	29800
pme0247	130.1	128	0.74	131.058	[M-H]-	C01157	trans-4-Hydroxy-L-proline	Amino acid derivatives	8530	11900	9600	18300	15700	11900	10300	7970	7370	6590	8080	8860
pme0249	189.1	97	4.43	188.105	[M+H]+	C08261	Azelaic Acid	Organic acids	793000	844000	883000	774000	633000	752000	802000	811000	767000	892000	965000	927000
pme0252	172.1	130	3.41	173.105	[M-H]-	C02710	N-Acetyl-l-leucine	Amino acid derivatives	64500	66200	62700	62600	92600	164000	32400	34500	36500	70200	72600	75600
pme0256	151	108	1.17	152.033	[M-H]-	C00385	Xanthine	Nucleotide and its derivates	502000	581000	608000	772000	512000	652000	331000	374000	390000	751000	745000	657000
pme0257	111	111	1	112.027	[M-H]-	C00106	Uracil	Nucleotide and its derivates	323000	323000	268000	250000	237000	204000	247000	218000	250000	286000	246000	217000
pme0264	243.1	127.1	2.08	242.09	[M+H]+	C00214	Thymidine	Nucleotide and its derivates	838000	1360000	1390000	1010000	788000	629000	1650000	1690000	1610000	1620000	1860000	1990000
pme0266	201.1	139.1	5.02	202.12	[M-H]-	C08277	Sebacate	Organic acids	3520	3550	3560	4000	2740	4670	3310	2160	4080	3550	5460	3910
pme0267	131	86.9	2.08	132.042	[M-H]-	-	2-Methylsuccinic acid	Organic acids	688000	782000	759000	1040000	1130000	1160000	744000	703000	648000	450000	500000	617000
pme0269	229.2	167.2	6.12	230.152	[M-H]-	C02678	Dodecanedioic aicd	Organic acids	3640	3560	4160	3190	3490	3640	3740	4030	3680	3220	4000	4150
pme0270	117	98.9	1.26	116.011	[M+H]+	C01384	Maleic acid	Organic acids	2150000	3810000	4150000	5290000	4530000	6040000	9	3520000	2110000	4680000	5740000	5880000
pme0274	132.1	76.9	1	131.095	[M+H]+	C02378	6-Aminocaproic acid	Organic acids	1070000	1540000	1460000	1480000	1080000	1540000	1120000	1380000	1270000	1440000	1390000	1320000
pme0275	115	97.9	1.97	116.047	[M-H]-	-	4-Oxopentanoate	Organic acids	14500	17900	12700	11300	15000	11800	22300	22000	26300	9930	8370	19000
pme0278	191.1	127.7	0.73	190.095	[M+H]+	C00666	"2,6-Diaminooimelic acid"	Amino acid derivatives	3640000	3910000	3920000	7960000	6260000	8880000	1870000	2490000	2440000	1960000	2370000	2310000
pme0281	165	121.1	3	166.027	[M-H]-	C06337	Terephthalic acid	Organic acids	967000	1010000	1050000	1860000	1210000	1280000	1080000	1220000	1050000	1520000	1370000	1770000
pme0282	165	76.9	2.98	166.027	[M-H]-	C01606	Phthalic acid	Organic acids	20500	26900	28700	34500	29600	26000	37200	30200	30600	40500	32500	49000
pme0285	146.1	85.9	0.77	145.085	[M+H]+	C01035	4-Guanidinobutyric acid	Organic acids	4970000	5380000	5670000	14700000	10900000	10100000	3220000	3130000	3050000	2750000	3080000	3000000
pme0286	131.1	85	3.48	132.079	[M-H]-	-	2-Hydroxyisocaproic acid	Organic acids	31000	29300	26500	25600	22200	69800	18600	13800	20400	28000	21700	27400
pme0289	151.1	78.8	5.92	150.068	[M+H]+	-	4-Ethylbenzoic acid	Organic acids	132000	123000	117000	80900	139000	140000	139000	114000	91800	108000	76200	91600
pme0291	160.1	114.1	3.03	159.126	[M+H]+	-	Dl-2-Aminooctanoic acid	Organic acids	57900	89100	105000	123000	112000	125000	107000	53200	65100	52200	9	9
pme0295	146.1	85.8	1.59	145.074	[M+H]+	-	4-Acetamidobutyric acid	Organic acids	727000	882000	916000	818000	962000	1360000	895000	996000	1490000	313000	373000	402000
pme0299	147.1	61.8	5.22	148.052	[M-H]-	C00423	Cinnamic acid	Hydroxycinnamoyl derivatives	17300	19700	15700	20400	30400	33200	8760	7740	7680	8530	12600	11100
pme0305	193.1	134.1	4.03	194.058	[M-H]-	C01494	Ferulic acid	Hydroxycinnamoyl derivatives	8530000	8790000	8250000	10600000	8990000	9750000	7720000	7210000	7320000	7050000	5690000	7620000
pme0307	227.1	143.1	4.74	228.079	[M-H]-	C03582	Resveratrol	Hydroxycinnamoyl derivatives	49200	45000	45700	55300	56200	33800	51300	81200	61200	3440	8020	8330
pme0309	183	124.1	3.11	184.037	[M-H]-	-	Methyl gallate	Benzoic acid derivatives	25700	23500	27600	39900	28400	32800	21300	11900	12400	9	9	21900
pme0330	579.2	135	3.97	580.179	[M-H]-	C09789	Naringenin 7-O-neohesperidoside (Naringin)	Flavanone	474000	417000	388000	654000	759000	735000	110000	128000	96200	246000	330000	446000
pme0332	577.2	269.1	4.02	578.164	[M-H]-	C12627	Apigenin 7-O-neohesperidoside (Rhoifolin)	Flavone	1180000	1040000	983000	728000	424000	1500000	453000	2150000	1110000	969000	1110000	842000
pme0359	433.1	313.1	3.75	432.106	[M+H]+	-	Apigenin 5-O-glucoside	Flavone	1570000	2050000	2510000	5600000	4190000	2740000	1210000	1220000	1490000	456000	463000	298000
pme0361	435.1	303	3.96	434.085	[M+H]+	-	Quercetin 3-alpha-L-arabinofuranoside (Avicularin)	Flavonol	14400	23600	31600	9	9	9	31600	42900	42800	18800	9	9
pme0363	299.1	284	5.71	300.063	[M-H]-	C04293	Chrysoeriol	Flavone	13800000	13100000	12800000	15600000	16800000	16800000	4690000	4650000	3730000	2700000	9300000	14500000
pme0367	577.2	269.1	3.82	578.164	[M-H]-	-	Apigenin 7-rutinoside (Isorhoifolin)	Flavone	1260000	1080000	1050000	790000	442000	1630000	480000	2330000	1130000	1020000	1090000	881000
pme0369	593.2	285.1	3.79	594.159	[M-H]-	-	Kaempferol 3-O-rutinoside (Nicotiflorin)	Flavonol	729000	572000	595000	775000	577000	1120000	578000	892000	794000	323000	406000	445000
pme0371	433.1	122.9	4.21	434.121	[M-H]-	C09099	Naringenin 7-O-glucoside (Prunin)	Flavanone	652000	727000	672000	647000	561000	649000	757000	899000	930000	190000	186000	184000
pme0374	431.1	431.1	3.7	432.106	[M-H]-	C01714	Isovitexin	Flavone C-glycosides	551000	532000	535000	538000	613000	721000	459000	294000	445000	485000	665000	928000
pme0376	271.1	151	5.54	272.068	[M-H]-	C00509	Naringenin	Flavanone	4560000	4480000	4520000	3900000	3770000	5060000	7130000	7750000	4800000	781000	2320000	1860000
pme0379	271.1	215.1	5.62	270.053	[M+H]+	C01477	Apigenin	Flavone	3390000	4940000	5130000	4730000	4280000	2810000	1680000	3560000	2130000	748000	2170000	9280000
pme0388	183.1	137.1	3.25	182.058	[M+H]+	C05582	Homovanillic acid	Hydroxycinnamoyl derivatives	141000	125000	185000	212000	177000	201000	101000	99400	146000	155000	132000	174000
pme0398	353.1	191.1	2.74	354.095	[M-H]-	C00852	Chlorogenic acid (3-O-Caffeoylquinic acid)	Quinate and its derivatives	29000000	28400000	28300000	11700000	9160000	11100000	61800000	59300000	51400000	4810000	5180000	6770000
pme0408	197.1	122.9	3.38	198.053	[M-H]-	C10833	Syringic acid	Hydroxycinnamoyl derivatives	103000	113000	107000	103000	73100	90100	129000	160000	128000	61600	74100	78600
pme0413	151	136.1	3.97	152.047	[M-H]-	C00755	Vanillin	Benzoic acid derivatives	1260000	1370000	1210000	873000	811000	919000	1250000	1070000	964000	2430000	2410000	3100000
pme0418	165.1	92.9	3.84	166.063	[M-H]-	C01744	3-(4-Hydroxyphenyl)propionic acid	Hydroxycinnamoyl derivatives	64100	72700	67800	60100	53400	82100	44900	48300	44500	111000	117000	123000
pme0422	193.1	134.1	4.03	194.058	[M-H]-	-	3-Hydroxy-4-methoxycinnamic acid	Hydroxycinnamoyl derivatives	8690000	8730000	8620000	10800000	9420000	10100000	7760000	7620000	7260000	7090000	6010000	7730000
pme0428	237.1	103.1	5	238.084	[M-H]-	-	"3,4,5-Trimethoxycinnamic acid"	Hydroxycinnamoyl derivatives	8570	9100	9590	13300	8800	15300	5960	8400	3770	4310	8150	6190
pme0430	575	285.3	3.69	576.127	[M-H]-	-	Procyanidin A1	Proanthocyanidins	74000	78400	96500	346000	212000	110000	9	204000	14300	9	9	9
pme0432	575	285.3	3.64	576.127	[M-H]-	C10237	Procyanidin A2	Proanthocyanidins	124000	119000	125000	72500	45700	28400	219000	284000	276000	9	9	9
pme0434	577	407.3	2.87	578.142	[M-H]-	-	Procyanidin B2	Proanthocyanidins	4850000	4400000	4410000	9	12900	9	11000000	12800000	11400000	11500	4660	1810
pme0436	577.1	407.3	2.87	578.142	[M-H]-	-	Procyanidin B3	Proanthocyanidins	5360000	5290000	5410000	9	9	9	12100000	12900000	14600000	9	9	9
pme0442	303	149.3	2.9	303.24	Protonated	C05908	Delphinidin	Anthocyanins	74500	182000	219000	9	9	9	344000	335000	380000	9	9	9
pme0450	289	78.8	3.18	290.3	[M-H]-	C09727	L-Epicatechin	Catechin derivatives	54300000	50600000	47700000	515000	337000	165000	104000000	107000000	100000000	9	64400	107000
pme0486	117	100	1.32	118.027	[M-H]-	C02170	Methylmalonic acid	Organic acids	19900000	20600000	19900000	22900000	19900000	24900000	24200000	23300000	23200000	15700000	17400000	19300000
pme0496	122	77.9	1.14	123	[M-H]-	C00253	Nicotinic acid	Nicotinic acid derivatives	1060000	1170000	1070000	1770000	1410000	1810000	772000	755000	722000	954000	1050000	1000000
pme0500	503.4	323.2	0.79	504.169	[M-H]-	-	D(+)-Melezitose	Carbohydrates	170000	210000	173000	89600	123000	118000	287000	249000	273000	351000	282000	256000
pme0513	151	70.8	0.77	152.069	[M-H]-	C00379	Xylitol	Alcohols and polyols	215000	251000	263000	640000	348000	385000	169000	183000	235000	49700	80100	58700
pme0516	179.2	87	0.74	180.063	[M-H]-	C00137	Inositol	Others	1120000	1250000	1130000	695000	848000	833000	1170000	1050000	1250000	1600000	1520000	1600000
pme0519	341	58.8	0.78	342.116	[M-H]-	-	D-(+)-Sucrose	Carbohydrates	16400000	19700000	19900000	17900000	20400000	16100000	23800000	14600000	16400000	14400000	18100000	17600000
pme0534	195.2	75.1	0.7	196.058	[M-H]-	C00257	Gluconic acid	Carbohydrates	15900000	17500000	17400000	19200000	17900000	34000000	20400000	18000000	28100000	3050000	3690000	3400000
pme0543	160.1	116	4.32	161.048	[M-H]-	-	Indole-5-carboxylic acid	Indole derivatives	1160000	1190000	1080000	1940000	1970000	2340000	417000	380000	465000	391000	360000	311000
pme1002	138.1	103	1.2	137.084	[M+H]+	C00483	L-Tyramine	Amino acids	24900	44500	30800	68400	36900	27900	30600	31100	40800	23900	31800	36200
pme1021	177.1	70.8	0.78	178.048	[M-H]-	C00198	"D-(+)-Glucono-1,5-lactone"	Carbohydrates	65000	62000	46300	71200	76000	115000	79400	78000	94700	19000	23100	10600
pme1055	207.1	144.1	1.95	208.085	[M-H]-	C00328	L-Kynurenine	Amino acid derivatives	35700	37000	40100	75200	64500	67500	18100	17100	16600	32800	28900	57200
pme1063	243.1	110	1.19	244.07	[M-H]-	C00299	Uridine	Nucleotide and its derivates	2640000	3380000	3350000	2520000	2060000	2270000	3190000	3020000	3400000	3950000	3960000	4230000
pme1086	306	143	1.14	307.084	[M-H]-	C00051	Glutathione reduced form	Amino acid derivatives	559000	599000	584000	133000	298000	217000	3000000	2180000	2180000	2380000	2290000	1980000
pme1097	134.1	134.1	1.13	135.055	[M-H]-	C00147	Adenine	Nucleotide and its derivates	980000	1080000	979000	979000	686000	925000	612000	638000	640000	1850000	2110000	2120000
pme1104	130.1	130.1	1.23	131.095	[M-H]-	C00407	L-Isoleucine	Amino acids	77500	79700	75900	63300	78200	117000	60800	90800	78300	83700	80100	85900
pme1109	152	135.1	1.15	151.049	[M+H]+	C00242	Guanine	Nucleotide and its derivates	27500000	35100000	36600000	18500000	11300000	13200000	14700000	19100000	17000000	66900000	71200000	80800000
pme1119	269.1	137	0.8	268.081	[M+H]+	C00294	Inosine	Nucleotide and its derivates	395000	606000	640000	507000	410000	438000	540000	555000	503000	675000	747000	859000
pme1137	140	122	1.43	139.027	[M+H]+	C01020	6-hydroxynicotinic acid	Vitamins	138000	158000	181000	346000	208000	208000	141000	150000	192000	111000	114000	101000
pme1162	169	122.8	1.75	170.022	[M-H]-	C01424	Gallic acid	Benzoic acid derivatives	94400	110000	102000	66900	54800	106000	99700	103000	133000	9	9	9
pme1175	282.1	150.1	1.47	283.092	[M-H]-	C00387	Guanosine	Nucleotide and its derivates	8490000	10500000	10600000	9170000	8230000	9620000	6930000	7430000	6150000	14100000	14000000	15900000
pme1181	266.1	150.1	1.69	267.097	[M-H]-	C00330	Deoxyguanosine	Nucleotide and its derivates	241000	286000	302000	358000	248000	272000	169000	163000	180000	284000	439000	490000
pme1187	257.1	125.1	1.83	258.085	[M-H]-	-	5-Methyluridine	Nucleotide and its derivates	41900	51700	54100	56200	52400	54500	53700	41000	48600	41000	48400	50100
pme1194	228	112	1.13	227.091	[M+H]+	C00881	Deoxycytidine	Nucleotide and its derivates	61200	115000	104000	122000	58500	130000	117000	117000	119000	97700	126000	112000
pme1201	273.1	167.1	5.52	274.084	[M-H]-	C00774	Phloretin	Flavanone	870000	865000	892000	1500000	1800000	757000	553000	1080000	464000	123000	327000	374000
pme1210	150	72.8	1.18	149.051	[M+H]+	C00073	L-Methionine	Amino acids	2790000	3630000	3850000	4110000	2680000	2260000	4660000	5440000	4420000	3710000	4150000	3370000
pme1218	124	77.8	1.21	123.032	[M+H]+	C10164	2-Picolinic acid	Organic acids	1450000	2380000	2420000	3510000	2760000	2790000	1530000	1700000	1560000	1960000	2160000	1980000
pme1228	221.1	114.8	1.58	220.085	[M+H]+	C00643	5-Hydroxy-L-tryptophan	Amino acid derivatives	285000	333000	325000	334000	253000	354000	285000	342000	339000	396000	338000	371000
pme1239	320.4	128.1	1.24	321.1	[M-H]-	C11347	S-(methyl)glutathione	Amino acid derivatives	24700	28600	26500	23800	20200	26200	29300	29400	30000	19500	20000	16000
pme1261	206.1	188.2	2.29	205.131	[M+H]+	C05944	Pantothenol	Alcohols and polyols	63700	78200	80200	66200	77100	133000	90400	82000	84600	58800	75100	68700
pme1283	383	134	1.29	384.122	[M-H]-	C00021	S-(5'-Adenosy)-L-homocysteine	Amino acid derivatives	563000	736000	749000	1260000	1030000	807000	460000	372000	388000	659000	809000	893000
pme1292	167.1	122.1	2.26	168.042	[M-H]-	C00544	Homogentisic acid	Organic acids	1190000	1360000	1330000	755000	760000	768000	3120000	2760000	2630000	601000	597000	679000
pme1294	283	151.1	1.77	284.076	[M-H]-	C01762	Xanthosine	Nucleotide and its derivates	6070000	7000000	7430000	5660000	7050000	5890000	4640000	3930000	4740000	10800000	10100000	10700000
pme1306	250	134	1.25	249.04	[M+H]+	C00627	Pyridoxine 5'-phosphate	Vitamins	32600	40500	29400	35100	65900	46500	53000	47300	27800	50900	35300	51300
pme1310	235.1	130.1	2.05	236.08	[M-H]-	C02700	N'-Formylkynurenine	Amino acid derivatives	17900	14500	15400	32300	25900	28900	11000	6860	8270	9570	11500	9470
pme1346	300.1	168.1	1.48	299.087	[M+H]+	-	8-Hydroxyguanosine	Nucleotide and its derivates	46800	97100	110000	64200	59200	70200	75700	69900	80500	78500	130000	123000
pme1363	662.1	540.1	1.13	663.109	[M-H]-	C00003	Nicotinic acid adenine dinucleotide	Nucleotide and its derivates	756000	914000	656000	1080000	1110000	1080000	895000	556000	526000	532000	510000	647000
pme1368	128	126	1.15	129.079	[M-H]-	C00408	L-Pipecolic acid	Amino acid derivatives	115000	131000	108000	199000	139000	248000	78800	84000	112000	71000	97100	76900
pme1373	306	78.8	1.2	307.057	[M-H]-	C00239	2'-Deoxycytidine-5'-monophosphate	Nucleotide and its derivates	11800	14400	13200	19000	17600	17500	32200	20900	26500	19600	20700	21900
pme1378	282.1	150.1	2.31	281.112	[M+H]+	C02494	1-Methyladenosine	Nucleotide and its derivates	157000	419000	411000	357000	338000	250000	340000	322000	347000	392000	475000	451000
pme1383	170.1	134.1	1.11	169.074	[M+H]+	C00314	Pyridoxine	Vitamins	2150000	2510000	2380000	1820000	1900000	1880000	2360000	2440000	2790000	2440000	2970000	2420000
pme1398	465.1	303.1	2.38	465.1	Protonated	C12138	Delphinidin 3-O-glucoside (Mirtillin)	Anthocyanins	2590000	4360000	4320000	7630000	6400000	2650000	1230000	1890000	1080000	2540000	3870000	8500000
pme1408	145.1	127.1	0.74	146.069	[M-H]-	C00064	L-Glutamine	Amino acids	350000	410000	412000	356000	154000	261000	294000	386000	394000	415000	605000	507000
pme1417	161.1	144.2	2.72	160.1	[M+H]+	C00398	L-Tryptamine	Tryptamine derivatives	2870000	3250000	3170000	400000	233000	246000	2210000	2420000	2230000	8000000	7810000	6300000
pme1424	177.1	177.1	4.59	178.063	[M-H]-	C02666	Coniferylaldehyde	Hydroxycinnamoyl derivatives	31800	35400	30700	52300	40800	37500	19900	19000	15100	25600	51700	44600
pme1434	371.1	209.2	2.76	372.142	[M-H]-	C01533	Syringin	Hydroxycinnamoyl derivatives	217000	230000	215000	465000	307000	364000	103000	108000	101000	211000	202000	203000
pme1436	163	119	3.83	164.047	[M-H]-	C00811	p-Coumaric acid	Hydroxycinnamoyl derivatives	9840000	10200000	9810000	8610000	9210000	9290000	6970000	6890000	6640000	17200000	20100000	20800000
pme1450	231	144.1	4.61	232.121	[M-H]-	C01598	Melatonin	Tryptamine derivatives	8450	7560	5880	4500	8070	6130	9520	9600	12000	15800	14600	16900
pme1472	169	111	3.32	168.042	[M+H]+	C06672	Vanillic acid	Hydroxycinnamoyl derivatives	979000	1020000	988000	1120000	1150000	982000	913000	864000	778000	968000	993000	1040000
pme1473	296	134	2.85	297.09	[M-H]-	C00170	5'-Deoxy-5'-(methylthio)adenosine	Nucleotide and its derivates	33200	33100	29800	28000	17800	16500	24300	27000	28200	57300	40300	47400
pme1478	317	179	4.43	318.038	[M-H]-	C10107	Myricetin	Flavonol	154000	144000	130000	351000	367000	118000	64900	97200	65600	9	9	9
pme1488	459	139.1	3.28	458.085	[M+H]+	C09731	Epigallate catechin gallate (EGCG)	Catechin derivatives	162000	162000	178000	132000	104000	155000	158000	136000	129000	280000	235000	269000
pme1496	267.1	252.1	6.27	268.074	[M-H]-	C00858	Formononetin (4'-O-methyldaidzein)	Isoflavone	21200	15800	21400	67400	63200	41800	7740	24900	3810	9	9	9
pme1502	315.1	300	7.17	314.079	[M+H]+	-	Kumatakenin	Flavonol	16600000	15900000	15500000	29600000	31600000	18800000	1100000	2290000	1130000	915000	2690000	8100000
pme1510	269.1	251.1	5.8	270.053	[M-H]-	C10023	"Baicalein (5,6,7-Trihydroxyflavone)"	Flavone	22800	11100	16900	23100	12700	8950	9	8700	7760	9	6460	42200
pme1518	403.1	373.1	7.02	402.132	[M+H]+	C10112	Nobiletin	Flavone	51700	48000	56400	36000	45500	39000	43000	53300	51800	39200	36100	41800
pme1521	303.1	125.1	4.09	304.058	[M-H]-	C01617	Dihydroquercetin (Taxifolin)	Flavonol	10800000	9380000	9320000	52600	48700	35300	19400000	22500000	24400000	37100	31000	30100
pme1537	307	248.1	2.34	306.074	[M+H]+	C12127	(+)-Gallocatechin (GC)	Catechin derivatives	24500	52000	49200	9	9	9	158000	191000	188000	9	9	9
pme1539	623.2	314	3.75	624.169	[M-H]-	-	Isorhamnetin 3-O-neohesperidoside	Flavonol	72400	64400	59100	8800	7950	9350	172000	147000	182000	22700	33100	29300
pme1541	283.1	268	6.98	284.069	[M-H]-	C01470	Acacetin	Flavone	1890000	1760000	1740000	2930000	3430000	2810000	212000	274000	135000	43100	117000	182000
pme1550	373.1	373.1	7.5	372.121	[M+H]+	C10190	Tangeretin	Flavone	63000	53300	52600	43700	40200	43000	51700	47300	47600	51700	46800	51300
pme1562	441.3	289.1	3.83	442.3	[M-H]-	-	Epicatechin gallate (ECG)	Catechin derivatives	55900	51000	54100	44000	46600	57100	55700	51800	51200	73200	78600	96400
pme1568	285	257.1	5.05	286.048	[M-H]-	C10510	"Orobol (5,7,3',4'-tetrahydroxyisoflavone)"	Isoflavone	1140000	1150000	1130000	507000	427000	359000	284000	604000	238000	179000	519000	4290000
pme1580	287.1	135.1	5.03	288.063	[M-H]-	C05631	Eriodictyol	Flavanone	5210000	4830000	4770000	2610000	3150000	2020000	8690000	17100000	5590000	626000	1590000	2110000
pme1587	417.1	255.1	3.52	416.111	[M+H]+	C10216	Daidzein 7-O-glucoside (Daidzin)	Isoflavone	348000	804000	677000	9	9	9	9	9	9	98400	158000	130000
pme1588	315.1	300.1	5.81	316.058	[M-H]-	C10084	Isorhamnetin	Flavonol	9600	5690	6150	9	5570	3660	10500	10900	12700	9	9	9
pme1598	463.1	301.1	3.81	464.132	[M-H]-	-	Hesperetin 5-O-glucoside	Flavanone	2240000	2020000	2140000	273000	181000	210000	5990000	5680000	6520000	340000	402000	376000
pme1600	303.1	167.1	6.07	302.079	[M+H]+	-	7-O-Methyleriodictyol	Flavanone	3330000	3930000	4100000	10800000	7110000	3410000	178000	472000	242000	104000	450000	1040000
pme1605	593.2	285.1	3.66	594.159	[M-H]-	-	Kaempferol 3-O-robinobioside (Biorobin)	Flavonol	695000	575000	611000	797000	582000	1110000	579000	827000	830000	348000	423000	474000
pme1611	433.1	433	3.72	434.121	[M-H]-	-	Isohemiphloin	Flavone	276000	274000	280000	112000	103000	134000	624000	432000	682000	93700	86200	93400
pme1622	447.1	287.1	4.03	448.101	[M-H]-	C12249	Kaempferol 3-O-glucoside (Astragalin)	Flavonol	8510000	8100000	7880000	11700000	10700000	11100000	7870000	5760000	6920000	1950000	2610000	9730000
pme1640	371.1	267.1	11.63	370.105	[M+H]+	-	sesamolin	Others	7970000	23900000	22600000	3200000	607000	864000	507000	677000	666000	1470000	985000	714000
pme1662	287.1	287.1	6.92	286.084	[M+H]+	C09833	sakuranetin	Flavone	271000	329000	290000	825000	263000	206000	89900	213000	49300	47300	94300	72100
pme1665	593.2	431.1	3.19	594.159	[M-H]-	C08064	Isovitexin 7-O-glucoside (Saponarin)	Others	8180	5540	4320	10300	11800	13000	4580	3260	9	5140	8550	6530
pme1683	477.2	258.1	2.25	476.168	[M+H]+	C12276	D-Pantothenic dcid	Organic acids	22500	47300	43400	29700	38000	31500	50300	40900	46000	53700	59900	67000
pme1691	147.1	88	0.77	146.118	[M+H]+	C08201	Acetylcholine	Cholines	103000	155000	180000	280000	194000	200000	134000	132000	177000	104000	131000	101000
pme1692	347	78.8	1.18	348.047	[M-H]-	C00130	Inosine 5'-monophosphate	Nucleotide and its derivates	27700	28600	29700	30500	33300	25600	41700	37800	36400	29600	33000	29300
pme1695	223.1	149.1	4.01	224.069	[M-H]-	C00482	Sinapic acid	Hydroxycinnamoyl derivatives	99700	82100	85500	142000	97600	116000	104000	105000	81800	29700	33500	35600
pme1709	138.1	78	3.69	137.048	[M+H]+	-	Nicotinic Acid Methyl Ester (Methyl Nicotinate)	Vitamins	2520000	3080000	3170000	1460000	1400000	1250000	525000	537000	501000	1040000	968000	902000
pme1711	117.1	99.9	2.09	118.063	[M-H]-	-	3-Hydroxy-3-methyl butyric acid	Organic acids	159000	181000	174000	133000	141000	190000	216000	170000	205000	192000	209000	213000
pme1712	275	257.1	0.71	276.132	[M-H]-	C00449	L-Saccharopine	Amino acid derivatives	1060000	1180000	1100000	1270000	1160000	757000	1430000	1290000	1230000	503000	553000	556000
pme1738	138.1	95	0.81	137.071	[M+H]+	C02918	3-Carbamyl-1-methylpyridinium (1-Methylnicotinamide)	Pyridine derivatives	17400	27700	20600	21500	20700	15600	30400	31800	46200	23300	24300	19700
pme1777	611	287.7	2.15	611	Protonated	C08639	"Cyanidin 3,5-O-diglucoside (Cyanin)"	Anthocyanins	83000	243000	184000	9	9	9	121000	408000	538000	98800	98400	114000
pme1806	367	179.1	3.67	368.111	[M-H]-	-	Chlorogenic acid methyl ester	Quinate and its derivatives	91000	83800	82300	45200	33200	35100	163000	120000	123000	64900	73600	85900
pme1814	153	108.1	2.57	154.027	[M-H]-	C00628	"2,5-dihydroxybenzoic acid (Gentisic acid)"	Benzoic acid derivatives	3100000	3330000	3260000	1440000	1470000	2030000	7800000	6830000	7130000	327000	326000	694000
pme1816	353	191.1	2.58	354.095	[M-H]-	C17147	Neochlorogenic acid (5-O-Caffeoylquinic acid)	Quinate and its derivatives	5310000	5910000	5940000	4890000	3380000	4080000	11400000	12100000	11900000	1120000	1270000	1360000
pme1820	151	107.1	3.25	152.047	[M-H]-	C00642	p–Hydroxyphenyl acetic acid	Organic acids	443000	424000	449000	168000	144000	771000	322000	472000	444000	592000	503000	722000
pme1824	153.1	109.1	2.55	154.027	[M-H]-	C00230	Protocatechuic acid	Catechin derivatives	16900000	18000000	17400000	7590000	7890000	10600000	42900000	37900000	40200000	1710000	1800000	3660000
pme1828	118.1	118.1	0.78	117.079	[M+H]+	C00719	Betaine	Alkaloids	513000	1080000	994000	1120000	913000	803000	935000	861000	931000	1330000	1390000	1120000
pme1830	117	99.9	1.31	118.027	[M-H]-	C00042	Succinic acid	Organic acids	18100000	19600000	19800000	20900000	19100000	23100000	22500000	22200000	21500000	15100000	16100000	19300000
pme1841	103	86.1	0.62	102.116	[M+H]+	C01672	"1,5-Diaminopentane"	Phenolamides	1700000	2210000	2250000	4720000	2470000	4720000	1850000	2270000	2460000	468000	706000	693000
pme1846	179	70.9	0.76	180.063	[M-H]-	C00031	D(+)-Glucose	Carbohydrates	416000	508000	481000	354000	354000	477000	479000	592000	538000	368000	467000	448000
pme1852	132.1	90	0.77	131.07	[M+H]+	C00300	Creatine	Organic acids	25300	38800	39000	50600	59900	40000	41400	31700	60400	54900	38300	43600
pme1894	183	59.3	0.77	182.079	[M+H]+	C00794	D-Sorbitol	Alcohols and polyols	1080000	1320000	1220000	1120000	1610000	1950000	841000	918000	1040000	552000	675000	717000
pme1936	114.1	114	0.57	113.059	[M+H]+	C00791	Creatinine	Organic acids	343000	431000	461000	372000	273000	439000	418000	402000	414000	546000	513000	497000
pme1944	183.1	111	0.79	182.079	[M+H]+	C00392	D-Mannitol	Alcohols and polyols	2230000	2380000	2400000	2670000	2110000	3760000	1920000	2160000	2770000	1420000	1850000	1580000
pme1949	375	255.2	3.17	376.138	[M-H]-	C00255	Riboflavin	Vitamins	208000	208000	216000	314000	244000	264000	130000	131000	127000	250000	248000	268000
pme1980	175.1	83.1	3.7	174.089	[M+H]+	C08278	Suberic acid	Organic acids	161000	163000	169000	107000	120000	123000	151000	187000	171000	220000	260000	228000
pme1988	90	71.8	0.78	89.048	[M+H]+	C00041	L-Alanine	Amino acids	5600000	7660000	6720000	8190000	8870000	10800000	6070000	7170000	6340000	4320000	4980000	4760000
pme2019	149	58.9	0.77	150.053	[M-H]-	-	DL-Arabinose	Carbohydrates	53700	68600	51400	38600	49100	64500	68100	92300	71400	64500	67700	67200
pme2024	177	160.2	1.58	176.095	[M+H]+	C00780	serotonin	Tryptamine derivatives	1680000	1960000	2060000	9	9	9	4680000	5790000	2970000	2030000	2650000	2780000
pme2033	133	70.8	0.97	134.022	[M-H]-	C00497	L(-)-Malic acid	Organic acids	72500000	77900000	76500000	142000000	130000000	130000000	45900000	46700000	46900000	53300000	55200000	63600000
pme2036	191	85	1.13	192.063	[M-H]-	C00296	Quinic acid	Quinate and its derivatives	754000	825000	772000	470000	494000	425000	1140000	919000	940000	918000	1080000	1140000
pme2046	170	96	0.67	169.181	[M+H]+	-	3-N-Methyl-L-histidine	Amino acid derivatives	1080000	1300000	1550000	208000	309000	207000	709000	647000	523000	2620000	2570000	2400000
pme2049	103	56.8	1.57	104.047	[M-H]-	C05984	2-Hydroxybutanoic acid	Organic acids	218000	265000	252000	237000	243000	291000	303000	263000	277000	199000	238000	269000
pme2050	191	131	0.84	192.027	[M-H]-	C00158	Citric acid	Organic acids	13700000	15900000	15700000	11000000	9950000	10300000	22600000	19200000	21900000	13500000	17100000	19100000
pme2108	163	103	0.7	162.113	[M+H]+	C00318	L-Carnitine	Others	234000	310000	328000	250000	144000	122000	190000	225000	261000	403000	430000	393000
pme2111	175	87	0.99	176.12	[M-H]-	C00072	L-ascorbate	Vitamins	113000	124000	114000	156000	138000	196000	99300	117000	151000	147000	97800	202000
pme2122	112.1	94.6	0.63	111.08	[M+H]+	C00388	Histamine	Amino acid derivatives	894000	1140000	1190000	1970000	1900000	1400000	852000	698000	801000	775000	905000	784000
pme2129	131.1	68.9	3.51	132.079	[M-H]-	-	(S)-(-)-2-Hydroxyisocaproic acid	Organic acids	199000	233000	219000	154000	198000	595000	165000	143000	166000	216000	250000	242000
pme2134	121	71	0.85	122.058	[M-H]-	-	DL-threitol	Alcohols and polyols	860000	902000	959000	812000	1070000	857000	1010000	1080000	1020000	976000	1010000	1030000
pme2165	155	111	1.08	156.017	[M-H]-	C00295	Orotic acid	Vitamins	1320000	1480000	1500000	1760000	1550000	1160000	949000	2030000	832000	1130000	1510000	1590000
pme2169	115	97.9	1.11	116.011	[M-H]-	C00122	Fumaric acid	Organic acids	567000	493000	613000	609000	700000	596000	549000	566000	646000	157000	195000	249000
pme2181	513.2	453.2	6.74	514.22	[M-H]-	C08773	Nomilin	Terpenoids	5600	3910	3320	3540	3500	2020	2600	3890	3930	4620	5780	5130
pme2213	181	135.1	3.11	180.042	[M+H]+	C01197	Caffeic acid	Hydroxycinnamoyl derivatives	6870000	6990000	7270000	6280000	6150000	4860000	6250000	5850000	5050000	11600000	12000000	11000000
pme2237	181.1	70.8	0.75	182.079	[M-H]-	C01697	Dulcitol	Alcohols and polyols	724000	802000	764000	1010000	597000	1340000	666000	880000	1070000	363000	549000	512000
pme2246	301	58.8	3.75	302.006	[M-H]-	C10788	Ellagic acid	Others	104000	78300	83700	301000	240000	210000	29200	75300	9	9	38800	25300
pme2253	177.1	74.8	0.81	178.048	[M-H]-	C01040	L-Gulonic-γ-lactone	Carbohydrates	62100	72400	60400	62800	66400	100000	55700	81700	91000	22600	19800	24600
pme2256	151.1	70.8	0.73	152.069	[M-H]-	C01904	D-Arabitol	Alcohols and polyols	396000	391000	427000	1180000	574000	722000	321000	331000	437000	114000	149000	107000
pme2266	245.1	227.1	3.32	244.088	[M+H]+	C00120	Biotin	Vitamins	74100	157000	183000	173000	110000	106000	162000	166000	155000	143000	155000	93200
pme2268	138	137.9	0.79	137.048	[M+H]+	C01004	Trigonelline	Alkaloids	10400000	13900000	14400000	15700000	16300000	14400000	11500000	10400000	11800000	15200000	17000000	14800000
pme2278	362	78.9	1.15	363.058	[M-H]-	-	Guanosine monophosphate	Nucleotide and its derivates	37600	41300	42100	40700	40500	40400	51300	45500	43500	41900	41400	37400
pme2289	287.2	143.4	10.93	286.23	[M+H]+	C00473	Vitamin A	Vitamins	6480	12000	9000	7850	6780	5200	6080	4920	7250	7450	7260	5590
pme2292	89	71.9	0.64	88.1	[M+H]+	C00134	Putrescine	Phenolamides	296000	160000	135000	338000	307000	448000	193000	9	112000	181000	213000	188000
pme2319	301.1	242.1	5.63	302.079	[M-H]-	C01709	Hesperetin	Flavanone	70800	69300	72500	98400	119000	137000	64100	42500	69400	10400	25500	27800
pme2362	151	105	2.91	152.047	[M-H]-	C01984	Mandelic acid	Organic acids	131000	150000	141000	302000	308000	286000	64100	74700	76500	140000	135000	165000
pme2366	122.1	105	2.39	121.089	[M+H]+	C05332	Phenethylamine	Others	762000	1180000	1230000	1480000	265000	459000	379000	572000	371000	2360000	2440000	2560000
pme2380	145	80.8	1.13	146.022	[M-H]-	-	A-Ketoglutaric acid	Organic acids	55700	82500	65900	101000	118000	107000	54600	74200	53700	68200	52200	82000
pme2427	222.1	163	2.61	223.085	[M-H]-	-	N-Acetyl-L-tyrosine	Amino acid derivatives	95000	94300	97700	91200	97400	146000	112000	107000	85100	65400	83100	87400
pme2433	106	88.1	0.68	105.079	[M+H]+	C06772	Diethanolamine	Others	235000	325000	337000	299000	225000	250000	377000	469000	514000	316000	345000	285000
pme2435	163	70.8	0.82	164.069	[M-H]-	C01019	L-Fucose	Carbohydrates	31800	18600	13300	21100	19100	14900	12500	34500	31000	8570	12300	11400
pme2457	447.3	285.1	3.79	448.101	[M-H]-	-	Luteolin 7-O-glucoside (Cynaroside)	Flavone	6690000	6160000	6480000	7720000	8290000	8180000	6650000	5020000	5750000	1680000	2240000	8660000
pme2478	137.1	137	3.05	138.032	[M-H]-	C16700	Protocatechuic aldehyde	Catechin derivatives	744000	768000	734000	289000	313000	391000	1520000	1210000	1240000	664000	664000	750000
pme2491	577.5	431	3.77	578.164	[M-H]-	C16981	"Kaempferol 3,7-dirhamnoside (Kaempferitrin)"	Flavonol	18600	16600	22000	13000	15600	13100	28900	25000	36300	9	9	9
pme2527	133	70	0.65	132.16	[M+H]+	C00077	L(+)-Ornithine	Amino acids	245000	459000	440000	738000	819000	535000	378000	375000	566000	195000	265000	203000
pme2529	163.2	162.9	0.83	164.069	[M-H]-	C07326	"1,5-Anhydro-D-glucitol"	Alcohols and polyols	60200	61500	69000	188000	128000	219000	45900	27100	42300	24800	35600	15800
pme2541	103	56.8	1.55	104.047	[M-H]-	-	α-Hydroxyisobutyric acid	Organic acids	48200	62000	61300	51700	50200	68400	65200	64700	67400	44100	60700	55100
pme2555	346	78.8	1.13	347.063	[M-H]-	C00020	Adenosine 5'-monophosphate	Nucleotide and its derivates	310000	422000	325000	344000	328000	319000	493000	397000	404000	333000	376000	333000
pme2559	174	88	1.19	175.048	[M-H]-	C01042	N-Acetylaspartate	Amino acid derivatives	103000	125000	115000	299000	286000	202000	57600	36800	55400	39000	51500	48600
pme2563	249.3	128	1.21	250.062	[M-H]-	C00669	γ-Glu-Cys	Amino acid derivatives	23200	29400	26600	13700	24300	27000	79800	58600	73000	30700	34400	36300
pme2566	217	88	1.14	218.09	[M-H]-	C03740	(5-L-Glutamyl)-L-amino acid	Amino acid derivatives	128000	120000	114000	243000	211000	243000	69700	69900	83700	83800	81500	95300
pme2589	159.1	58.8	1.17	160.037	[M-H]-	C00322	Oxoadipic acid	Organic acids	36000	63800	42200	78500	52200	43400	45700	51400	46400	49900	41900	44800
pme2596	184.1	148.1	1.67	183.053	[M+H]+	C00847	4-Pyridoxic acid	Pyridine derivatives	5260000	5550000	5430000	12000000	9980000	11300000	2390000	2560000	2410000	2390000	2490000	2520000
pme2598	167.1	139	2.43	168.042	[M-H]-	-	"3,4-Dihydroxybenzeneacetic acid"	Organic acids	1230000	1420000	1400000	784000	801000	882000	3210000	2970000	2870000	659000	642000	726000
pme2603	152	108.1	2.67	153.043	[M-H]-	C00632	3-Hydroxyanthranilic acid	Organic acids	40700	54600	46200	21100	14600	28800	106000	93900	95700	9	9	18200
pme2607	192.1	114.9	3.04	191.058	[M+H]+	C05635	5-Hydroxyindole-3-acetic acid	Indole derivatives	631000	586000	727000	953000	1510000	1450000	179000	221000	185000	446000	448000	453000
pme2617	166	149.1	0.65	165.046	[M+H]+	-	Methionine sulfoxide	Amino acid derivatives	201000	264000	337000	240000	209000	226000	261000	257000	303000	238000	263000	273000
pme2634	118	88	0.84	117.079	[M+H]+	C01826	Dl-Norvaline	Amino acids	4000000	7540000	7650000	10100000	9790000	9890000	6040000	7430000	7350000	4890000	5840000	5710000
pme2639	303.2	159.1	4.71	302.152	[M+H]+	C18166	Enterodiol	Alcohols and polyols	211000	288000	306000	303000	223000	251000	94100	340000	65300	9	62900	85600
pme2651	742.1	620.2	1.22	743.075	[M-H]-	C00006	NADP	Others	31600	41600	43900	55900	62800	60500	55300	44700	34100	10800	9740	11500
pme2661	383	281.1	5.61	384.339	[M-H]-	C05443	Vitamin D3	Vitamins	54300	47000	42500	35100	38300	40800	44800	44800	44700	57300	56000	54400
pme2670	121	91.9	3.69	122.037	[M-H]-	C00633	4-Hydroxybenzaldehyde	Benzoic acid derivatives	9090000	8700000	8500000	743000	557000	1550000	4530000	3700000	4360000	30500000	35600000	47500000
pme2693	131	71.9	0.72	130.111	[M+H]+	C02714	N-Acetylputrescine	Phenolamides	68400	132000	129000	207000	159000	138000	178000	129000	146000	114000	135000	166000
pme2698	313.4	120	3.52	312.147	[M+H]+	-	Phe-Phe	Amino acid derivatives	28600	21500	33200	9	15700	13700	33300	31200	45500	25000	23700	23500
pme2706	153.2	109	2.64	154.027	[M-H]-	C00196	"2,3-Dihydroxybenzoic acid"	Organic acids	18000000	19300000	18000000	8350000	8190000	11400000	44500000	38800000	41200000	1810000	2070000	3900000
pme2723	146.1	118.1	4.49	145.053	[M+H]+	C08493	Indole-3-carboxaldehyde	Indole derivatives	1200000	1250000	1320000	1850000	1880000	2060000	961000	971000	1060000	541000	587000	530000
pme2735	399.2	250.1	0.76	398.137	[M+H]+	C00019	S-(5'-Adenosyl)-L-methionine	Amino acid derivatives	19100	27200	24200	19200	21100	9360	14500	10700	14100	26400	18700	14000
pme2755	222	138.1	0.6	221.09	[M+H]+	C00140	N-Acetyl-D-glucosamine	Carbohydrates	7710000	5570000	4810000	4550000	4440000	5870000	5700000	7450000	5580000	6310000	6520000	6820000
pme2758	162	144.1	0.78	163.129	[M-H]-	C03079	4-Hydroxy-L-glutamic acid	Amino acid derivatives	35300	37400	43600	55900	61000	40800	31100	24700	26000	26500	34000	31500
pme2773	223	88	0.77	222.067	[M+H]+	C02291	L-Cystathionine	Amino acid derivatives	87200	63100	80400	158000	105000	195000	42100	63500	51900	20800	27800	17300
pme2786	219	160.1	3.23	218.106	[M+H]+	C00978	N-Acetyl-5-hydroxytryptamine	Tryptamine derivatives	108000	176000	207000	47900	9	9	441000	519000	636000	9	44700	9
pme2819	287.2	173.2	11.2	286.23	[M+H]+	-	"All-trans-13,14-dihydroretinol"	Vitamins	38400	43100	57400	43000	42100	42000	45000	38600	43400	47600	43500	47500
pme2827	239	223	6.74	240.245	[M-H]-	C00517	Palmitaldehyde	Lipids_Fatty acids	36900000	39500000	38900000	27300000	2740000	3760000	5790000	4020000	5140000	3580000	3940000	4650000
pme2828	140	98.9	0.59	139.027	[M+H]+	C00870	4-Nitrophenol	Others	12000000	17300000	17000000	29100000	12300000	12200000	10000000	11700000	11900000	12000000	10200000	9300000
pme2830	140	78.5	0.71	141.019	[M-H]-	-	O-Phosphorylethanolamine	Others	35300	38100	32900	21100	24700	18100	43600	29200	35200	42000	32000	45400
pme2853	172.1	73.9	3.92	173.105	[M-H]-	-	Hexanoyl glycine	Amino acid derivatives	3320	4110	2210	3220	2160	2390	4740	3880	3810	4320	4960	4000
pme2884	166	124.1	0.77	167.037	[M-H]-	-	Guanidinoethyl sulfonate	Organic acids	82400	101000	87800	135000	129000	149000	94100	92700	106000	49400	77000	57200
pme2890	269	134	0.81	268.055	[M+H]+	C01817	L-Homocystine	Amino acids	33000	67900	58900	47800	31100	41900	74100	116000	71300	39100	54300	73200
pme2895	319.1	193	3.47	320.053	[M-H]-	C02906	Dihydromyricetin	Flavonol	100000	78200	86200	9	9	9	177000	243000	213000	9	9	9
pme2901	353.1	191.1	2.38	354.095	[M-H]-	-	1-O-Caffeoyl quinic acid	Quinate and its derivatives	5810000	6460000	6380000	5280000	3740000	4550000	13900000	14600000	12700000	1200000	1350000	1600000
pme2903	137	92.5	3.05	138.032	[M-H]-	C00156	4-Hydroxybenzoic acid	Organic acids	2880000	2650000	2730000	1550000	1660000	5750000	1720000	1550000	1950000	3750000	3880000	5400000
pme2914	161	56.8	1.4	162.053	[M-H]-	C03761	"3-Hydroxy-3-methylpentane-1,5-dioic acid"	Amino acid derivatives	1530000	1990000	1940000	1960000	1840000	1890000	1720000	1860000	1940000	1400000	1710000	2070000
pme2949	609.2	301.1	3.96	610.19	[M-H]-	C09755	Hesperetin 7-rutinoside (Hesperidin)	Flavanone	398000	314000	381000	364000	392000	375000	224000	161000	244000	422000	431000	590000
pme2954	303	303	5.08	302.043	[M+H]+	C00389	Quercetin	Flavonol	51100	55400	75500	9	9	9	40900	101000	73600	14600	27400	103000
pme2957	271.1	151.1	5.45	272.069	[M-H]-	C06561	Naringenin chalcone	Flavanone	875000	883000	841000	893000	648000	807000	741000	2560000	470000	238000	542000	681000
pme2963	287.1	125.1	4.58	288.063	[M-H]-	C00974	Aromadedrin (Dihydrokaempferol)	Flavonol	295000	260000	261000	60900	72000	56000	683000	597000	720000	51200	70500	69900
pme2977	347.3	285.4	6.47	346.251	[M+H]+	-	Troxerutin (Trihydroxyethyl rutin)	Flavonol	8000	6950	9370	92700	7530	9	9	2560	9	9	9	9
pme2982	257.1	153	7.01	256.074	[M+H]+	C09827	Pinocembrin (Dihydrochrysin)	Flavanone	19300	28600	25800	21800	27700	32300	16700	48700	11700	5650	9340	9960
pme2984	593	285.2	4.9	594.195	[M-H]-	C09830	Isosakuranetin-7-neohesperidoside (Poncirin)	Flavanone	161000	144000	141000	180000	179000	79300	36300	58800	40200	62100	37900	362000
pme2988	149.2	107	5.6	148.052	[M+H]+	C02274	"3,4-Dihydrocoumarin"	Coumarins	328000	311000	321000	143000	141000	241000	253000	259000	268000	392000	491000	335000
pme2993	193.1	178.1	4	192.042	[M+H]+	C01752	Scopoletin (7-Hydroxy-5-methoxycoumarin)	Coumarins	138000	138000	170000	112000	134000	94500	262000	273000	221000	124000	178000	91800
pme2996	161	117	4.48	162.032	[M-H]-	C20414	4-Hydroxycoumarin	Coumarins	32100	25500	29500	25500	23100	28400	13100	32600	11000	9	9	18400
pme3005	74.1	74	1.39	73.053	[M+H]+	C03134	"N,N-Dimethylformamide"	Organic acids	2000000	2890000	2380000	1940000	1450000	1150000	5740000	3810000	3240000	1560000	1890000	1520000
pme3009	175	98.9	0.59	174.016	[M+H]+	-	trans-Citridic acid	Organic acids	55800	34000	32000	89600	35700	32500	23700	31500	23000	33600	35000	33200
pme3011	104.1	87	0.77	103.063	[M+H]+	C00334	γ-aminobutyric acid	Organic acids	2650000	3530000	3620000	7280000	3720000	5060000	2230000	2360000	2980000	1330000	3250000	2390000
pme3017	104	85.9	0.74	103.063	[M+H]+	C03665	2-Aminoisobutyric acid	Amino acid derivatives	3050000	4220000	4530000	4560000	4850000	4900000	4970000	4290000	4550000	4600000	4530000	4330000
pme3033	104	58	0.75	103.063	[M+H]+	C01026	"N,N-Dimethylglycine"	Amino acid derivatives	2900000	4030000	4250000	6310000	4400000	5220000	3890000	3680000	3990000	2660000	3700000	3320000
pme3034	131	86.9	1.89	132.042	[M-H]-	-	ethylmalonate	Organic acids	43500	38300	33700	56200	51700	39300	43400	36300	36300	24000	44400	48300
pme3038	130	83.9	1.04	129.043	[M+H]+	C01879	5-oxoproline	Amino acid derivatives	50500000	86000000	82900000	101000000	71200000	79800000	52900000	65000000	65700000	56000000	66700000	60200000
pme3069	556.3	371.2	10.22	555.284	[M+H]+	C05122	Taurocholic acid	Organic acids	285000	417000	395000	393000	367000	370000	352000	358000	401000	343000	350000	387000
pme3081	169.1	134.1	0.66	168.09	[M+H]+	C00534	4-(Aminomethyl)-5-(hydroxymethyl)-2-methylpyridin-3-ol	Others	114000	112000	106000	67700	132000	61400	109000	99100	121000	134000	163000	120000
pme3083	164	92	3.84	165.043	[M-H]-	-	2-(Formylamino)benzoic acid	Organic acids	1210000	1300000	1170000	1110000	1080000	1320000	843000	1140000	743000	1900000	2200000	2330000
pme3096	118	73.9	1.32	119.022	[M-H]-	C00872	Aminomalonic acid	Organic acids	707000	748000	753000	772000	662000	878000	843000	847000	822000	542000	631000	717000
pme3104	150	133.1	1.03	149.07	[M+H]+	C02216	1-Methyladenine	Nucleotide and its derivates	384000	543000	575000	214000	151000	87100	714000	787000	661000	744000	801000	761000
pme3129	463	301	3.8	464.096	[M-H]-	-	Quercetin 4'-O-glucoside (Spiraeoside)	Flavonol	1700000	1880000	1550000	358000	240000	282000	4620000	4260000	5210000	241000	322000	539000
pme3151	213	78.9	1.23	214.016	[M-H]-	-	Deoxyribose 5-phosphate	Nucleotide and its derivates	109000	124000	130000	195000	200000	221000	72800	115000	143000	38000	44800	47100
pme3154	147.1	58.8	1.3	148.074	[M-H]-	-	(Rs)-Mevalonic acid	Organic acids	72600	104000	104000	54800	97600	106000	99600	97800	110000	93400	100000	125000
pme3160	259	96.9	0.69	260.03	[M-H]-	C00092	D-Glucose 6-phosphate	Carbohydrates	208000	218000	160000	270000	399000	423000	191000	179000	280000	70000	79700	99100
pme3163	289	78.9	1.08	290.04	[M-H]-	-	D-Sedoheptuiose 7-phosphate	Carbohydrates	517000	716000	547000	391000	434000	421000	850000	752000	1140000	680000	820000	860000
pme3174	324	112	0.78	323.052	[M+H]+	C00055	Cytidine 5'-monophosphate (Cytidylic acid)	Nucleotide and its derivates	137000	318000	314000	311000	314000	153000	375000	354000	380000	242000	235000	215000
pme3179	179	75.9	0.78	178.041	[M+H]+	C01419	CYS-GLY	Amino acid derivatives	8520	19500	19000	22800	31100	18400	13700	18700	9	70500	46000	23800
pme3188	323	78.8	1.23	324.036	[M-H]-	C00105	Uridine 5'-monophosphate	Nucleotide and its derivates	83100	103000	81600	106000	84900	117000	122000	68100	117000	64800	63100	67000
pme3200	74	56.9	0.71	73.0971	[M+H]+	-	1-methylguanidine	Nucleotide and its derivates	147000	191000	162000	204000	173000	260000	208000	181000	206000	146000	172000	174000
pme3207	141	58.7	0.69	142.027	[M-H]-	-	"trans,trans-Muconic acid"	Organic acids	6560000	7590000	7680000	1450000	2100000	1960000	4290000	1950000	5400000	1270000	1190000	2970000
pme3208	445	282.1	3.51	446.121	[M-H]-	C16195	Glycitin	Isoflavone	18600	17800	25300	100000	63200	114000	27900	31100	21100	35600	35200	40300
pme3210	433	270.9	3.93	432.106	[M+H]+	C09126	Genistein 7-O-Glucoside (Genistin)	Isoflavone	1550000	2030000	2850000	4770000	4150000	2600000	1240000	1210000	1330000	9	123000	9
pme3211	463	301.1	3.81	464.096	[M-H]-	C05623	Quercetin 3-O-glucoside (Isotrifoliin)	Flavonol	2340000	2330000	2010000	315000	265000	237000	5390000	4890000	5310000	285000	362000	474000
pme3217	257	137.1	6.05	256.074	[M+H]+	C08650	Isoliquiritigenin	Flavanone	34500	35100	37100	30300	37200	27400	29800	24600	39500	40900	33900	27300
pme3235	255	119	4.87	256.074	[M-H]-	C09762	Liquiritigenin	Flavanone	6720	6650	7110	4890	6550	10100	9220	10000	9830	13200	9100	7400
pme3246	341	179.1	2.72	342.132	[M-H]-	C00761	Coniferin	Hydroxycinnamoyl derivatives	445000	587000	278000	383000	396000	523000	747000	757000	548000	281000	1960000	164000
pme3250	285	270.2	7	284.069	[M+H]+	C00814	Biochanin A	Isoflavone	175000	232000	264000	410000	446000	362000	9	148000	99100	9	9	9
pme3255	179	138	7.3	178.099	[M+H]+	C10454	Methyleugenol	Hydroxycinnamoyl derivatives	24600	25100	22700	15600	20800	17200	13900	27300	13400	16800	18500	16800
pme3267	447	284	3.99	448.101	[M-H]-	C12626	Kaempferol 3-O-galactoside (Trifolin)	Flavonol	7120000	6880000	6500000	9140000	8570000	8270000	6110000	4750000	5550000	1570000	2230000	8330000
pme3276	285	217.1	4.79	286.048	[M-H]-	C12134	2'-Hydroxygenistein	Isoflavone	3050000	2870000	2560000	1750000	1350000	1060000	592000	1460000	575000	485000	1480000	11200000
pme3282	273	97	3.29	274.084	[M-H]-	C09320	"Afzelechin (3,5,7,4'-Tetrahydroxyflavan)"	Flavanone	45900	48000	56300	193000	64200	78800	32300	88000	42500	28500	22300	30400
pme3292	283	268.1	6.95	284.069	[M-H]-	C10521	Prunetin	Isoflavone	1920000	1790000	1740000	3160000	3600000	2950000	209000	309000	151000	49000	114000	168000
pme3297	433	287	4.45	432.106	[M+H]+	C16911	Kaempferol 3-O-rhamnoside (Kaempferin)	Flavonol	58900	57700	63900	121000	135000	98200	18900	25900	9	12800	30200	47300
pme3300	301	149.1	4.38	302.043	[M-H]-	C10192	Tricetin	Flavone	162000	139000	160000	114000	209000	268000	75100	94500	9	3610	12900	23200
pme3309	145.1	101.1	2.63	146.058	[M-H]-	-	2-Methylglutaric acid	Organic acids	265000	293000	279000	409000	360000	508000	268000	215000	259000	189000	170000	243000
pme3313	259	78.8	0.97	260.03	[M-H]-	C00085	D-Fructose 6-phosphate	Carbohydrates	144000	205000	201000	303000	308000	353000	156000	143000	230000	55200	103000	62500
pme3333	153.1	136.1	1.48	152.059	[M+H]+	-	"1,4-dihydro-1-Methyl-4-oxo-3-pyridinecarboxamide"	Pyridine derivatives	521000	596000	546000	556000	540000	584000	469000	561000	494000	914000	1020000	1080000
pme3336	382	134.1	2.17	383.108	[M-H]-	-	N6-Succinyl Adenosine	Nucleotide and its derivates	1360000	1640000	1710000	2210000	1880000	2290000	1220000	1010000	1180000	1330000	1550000	1530000
pme3346	131.1	70.8	2.63	132.079	[M-H]-	-	5-hydroxyhexanoic acid	Organic acids	110000	129000	101000	95400	94700	84300	82100	84700	107000	84600	137000	123000
pme3349	282	192.1	1.91	283.092	[M-H]-	-	8-Hydroxy-2-deoxyguanosine	Nucleotide and its derivates	22600	23400	22400	9190	13000	15300	35000	31100	36000	16200	16000	20400
pme3351	144.1	126.1	0.82	145.074	[M-H]-	C04076	Allysine(6-Oxo DL-Norleucine)	Amino acid derivatives	39700	44800	42400	101000	71300	96600	35100	16500	30700	31800	28200	33900
pme3369	315	165.1	6.19	316.058	[M-H]-	C10176	Rhamnetin (7-O-methxyl quercetin)	Flavonol	21600	21000	21600	45500	42600	31400	3500	8200	3490	2050	4990	14100
pme3382	160	73.9	1.21	161.069	[M-H]-	-	N-Acetylthreonine	Amino acid derivatives	316000	364000	355000	797000	700000	790000	203000	182000	181000	148000	166000	143000
pme3388	189	144.2	0.68	188.127	[M+H]+	C01924	H-HomoArg-OH	Amino acid derivatives	1400000	1330000	1460000	2010000	1880000	2200000	1200000	1250000	1060000	975000	1010000	986000
pme3392	433.1	271	2.75	433.1	Protonated	-	Pelargonidin 3-O-beta-D-glucoside（Callistephin chloride)	Anthocyanins	2940000	4540000	5260000	22000000	14100000	14900000	10300000	10800000	9810000	1430000	3310000	1830000
pme3393	287	135.1	3.57	288.063	[M-H]-	C01378	Fustin	Flavonol	83800	63400	63900	83600	85000	106000	27600	57300	16700	9	16000	11800
pme3400	447.1	285.1	5.18	446.121	[M+H]+	C05376	Sissotrin	Isoflavone	159000	193000	144000	409000	438000	435000	9	74700	9	51100	88600	9
pme3410	333	305.2	4.96	332.053	[M+H]+	C12633	Laricitrin	Flavonol	20800	19600	13600	27900	31900	20900	9	8650	5810	9	4390	15000
pme3413	147.1	91	5.1	146.037	[M+H]+	C05851	Coumarin	Coumarins	15300	24700	19100	12800	11600	15900	20500	23000	18300	23800	16400	9
pme3419	179	122.9	3.12	178.027	[M+H]+	C09263	"Esculetin (6,7-dihydroxycoumarin)"	Coumarins	549000	549000	471000	90600	82300	77200	237000	186000	269000	1430000	2060000	1810000
pme3422	207.1	192	3.45	208.037	[M-H]-	C09265	"6-Methoxy-7,8-DihydroxyCoumarin"	Coumarins	45800	50000	40900	93400	94500	64500	8010	8780	9	12700	15600	49700
pme3428	339.1	177.1	2.71	340.079	[M-H]-	C09264	"Esculin (6,7-Dihydroxycoumarin-6-glucoside)"	Coumarins	792000	700000	709000	1000000	1070000	1190000	367000	238000	321000	933000	891000	944000
pme3434	211.1	137.1	4.57	212.069	[M-H]-	-	"Eudesmic acid (3,4,5-trimethoxybenzoic acid)"	Benzoic acid derivatives	16000	17300	13600	19600	12300	16300	14300	14400	16500	9	22500	19300
pme3439	271.1	135.1	5.3	272.069	[M-H]-	C08578	Butein	Flavanone	174000	165000	141000	151000	156000	168000	157000	158000	174000	178000	179000	189000
pme3442	477.1	301.1	3.67	478.36	[M-H]-	-	Quercetin 7-O-β-D-Glucuronide	Flavonol	65300	42100	32600	27800	25100	36800	48500	19700	26500	67500	50600	46600
pme3443	207.1	177.1	4.43	208	[M-H]-	-	Sinapinaldehyde	Hydroxycinnamoyl derivatives	246000	260000	248000	626000	626000	425000	47200	39900	42500	19700	44700	98100
pme3456	149.1	131	4.12	148	[M+H]+	-	p-Coumaraldehyde	Hydroxycinnamoyl derivatives	200000	207000	231000	446000	581000	9	9	141000	9	9	9	47300
pme3461	301.1	151	5.71	302.279	[M-H]-	C09756	Homoeriodictyol	Flavanone	32600	32300	34100	44100	43800	57800	41300	31200	36800	10000	17400	17600
pme3464	285.1	164	6.81	286.084	[M-H]-	C05334	Isosakuranetin (4'-Methylnaringenin)	Flavanone	8040	6800	7620	12700	7610	7080	5680	12100	2320	9	2520	2980
pme3473	271.1	151	5.59	272.069	[M-H]-	C09614	Butin	Flavone	5890000	5830000	5810000	5320000	5010000	6200000	8910000	9910000	5990000	944000	2890000	2370000
pme3478	277.1	146.2	2.75	278.13	[M-H]-	C00831	Pantetheine	Vitamins	172000	166000	150000	58800	112000	65600	274000	225000	225000	852000	773000	950000
pme3514	301	151.1	5.08	302.043	[M-H]-	C10105	Morin	Flavonol	194000	145000	124000	39900	38200	32600	250000	411000	315000	56400	57100	90700
pme3553	187	131	5.87	186.032	[M+H]+	C09305	Psoralen	Coumarins	19400	12700	10300	9	9	9	9	18600	12900	19400	26900	24300
pme3564	179	179	3.31	178.027	[M+H]+	C03093	Daphnetin	Coumarins	489000	573000	601000	138000	71600	142000	172000	193000	218000	1420000	1790000	1480000
pme3576	138.1	91.9	4.01	137.048	[M+H]+	C00108	Anthranilic acid	Benzoic acid derivatives	121000	114000	130000	153000	132000	156000	73900	112000	92700	69200	68800	63500
pme3705	193.1	72.9	0.72	194.043	[M-H]-	C00191	D-glucoronic acid	Carbohydrates	1020000	1120000	1110000	364000	359000	377000	2170000	3120000	2140000	301000	382000	453000
pme3719	165.1	74.9	0.95	166.048	[M-H]-	-	D-Xylonic acid	Organic acids	4830000	5520000	5250000	8600000	8140000	9060000	3480000	3560000	3490000	2960000	3390000	3770000
pme3732	244.1	111.4	0.82	243.086	[M+H]+	C00475	Cytidine	Nucleotide and its derivates	3220000	3970000	3450000	3440000	2820000	7990000	3920000	3870000	3860000	3400000	3350000	3520000
pme3827	198.2	114.9	1.15	197.069	[M+H]+	C00355	"3,4-Dihydroxy-DL-phenylalanine"	Amino acid derivatives	235000	261000	283000	289000	249000	353000	299000	304000	299000	330000	300000	303000
pme3835	344.2	344	1.37	345.047	[M-H]-	C00942	"Guanosine 3',5'-cyclic monophosphate"	Nucleotide and its derivates	28500	35200	39800	28800	24900	62800	31200	37200	51000	18500	21200	30100
pme3882	227.1	94	1.38	228.075	[M-H]-	C00526	2'-Deoxyuridine	Nucleotide and its derivates	10700	9200	8410	15600	11900	9740	9	9	9	5980	16900	14300
pme3960	250	131	1.96	251.102	[M-H]-	C00559	Deoxyadenosine	Nucleotide and its derivates	13000	18600	19600	31900	9	22000	11900	11300	13000	19300	31500	30400
pme3965	310	178.1	2.32	311.123	[M-H]-	-	2-(dimethylamino)guanosine	Nucleotide and its derivates	275000	310000	301000	276000	227000	381000	206000	187000	203000	373000	425000	499000
pme3970	243	153.1	1.2	244.07	[M-H]-	C02067	β-Pseudouridine	Nucleotide and its derivates	326000	405000	391000	271000	215000	283000	352000	336000	368000	495000	501000	544000
pme3982	267.1	135.1	1.43	268.081	[M-H]-	-	Hypoxanthine-9-β-D-arabinofuranoside	Nucleotide and its derivates	1630000	2100000	2010000	1680000	1420000	1680000	1520000	1550000	1740000	2560000	2520000	3030000
